1 **Balanced JAK/STAT signaling is critical to maintain the functional**  
2 **and structural integrity of the *Drosophila* respiratory epithelium**

3

4 **Xiao Niu<sup>1</sup>, Christine Fink<sup>1</sup>, Kimberley Kallsen<sup>2,4</sup>, Viktoria Mincheva<sup>1</sup>, Sören Franzenburg<sup>3</sup>,**  
5 **Ruben Prange<sup>1</sup>, Judith Bossen<sup>1</sup>, Holger Heine<sup>2, 5</sup>, Thomas Roeder<sup>1, 5</sup>**

6

7 <sup>1</sup>Kiel University, Zoology, Dept. of Molecular Physiology, Kiel, Germany

8 <sup>2</sup>Research Center Borstel, Dept. of Innate Immunity, Borstel, Germany

9 <sup>3</sup>Kiel University, IKMB, Kiel, Germany

10 <sup>4</sup>Current address: Boehringer Ingelheim, Ingelheim, Germany

11 <sup>5</sup>German Center for Lung Research, Airway Research Center North, Kiel, Germany

12

13

14

15

16

17

18 **Summary**

19 Signals mediated by the Janus kinase (JAK)/signal transducer and activator of transcription  
20 (STAT) pathway play a central role in maintaining homeostasis in a multitude of tissues. A  
21 large number of studies have shown that this role is particularly prominent in the lungs.  
22 Deregulation of the JAK/STAT signaling pathway is causally linked with various, mostly  
23 chronic, lung diseases, including lung cancer, asthma, and chronic obstructive pulmonary  
24 disease. To elucidate the molecular framework that explains how deregulated JAK/STAT  
25 signaling gives rise to pathogenic states, we used the fruit fly *Drosophila* as a model. While  
26 the JAK/STAT pathway is characterized by high structural diversity and complexity in  
27 vertebrates, it is relatively simple in *Drosophila*. The JAK/STAT pathway was active in  
28 almost all respiratory epithelial cells of larvae and adult flies. Stressful stimuli, such as  
29 cigarette smoke, evoked strong and regionalized activation of the JAK/STAT pathway,  
30 which was most likely driven by the concurrently induced ligand Unpaired 2. Inhibition of  
31 JAK/STAT signaling induced apoptotic processes in epithelial cells. The aforementioned  
32 chronic lung diseases are associated with increased activity of the JAK/STAT pathway and  
33 are treated with specific JAK inhibitors. Therefore, we investigated the effects of increased  
34 JAK/STAT signaling in the respiratory epithelium of *Drosophila*. Ectopic activation of the  
35 JAK/STAT pathway led to premature death at the larval or pupal stage. Furthermore, it  
36 induced major structural changes in epithelial cells, which almost completely lost their  
37 typical characteristics. These structural changes led to considerable thickening of the

38 epithelium, substantial narrowing of the air-conducting space, and disruption of the  
39 tracheal epicuticular structure. Pharmacological interference of JAK/STAT signaling  
40 reverted this phenotype. Activation of the JAK/STAT pathway also affected vesicle-  
41 mediated transport, which led to erroneous trafficking of typical junction proteins. In  
42 summary, these results demonstrate that balanced JAK/STAT signaling is essential for the  
43 normal functionality of the respiratory epithelium and thus the entire organ. A basal level  
44 of JAK/STAT signaling is required for cellular processes such as growth and division.  
45 However, chronic overactivation of this signaling leads to massive structural changes that  
46 are closely related to pathologies typically seen in chronic inflammatory lung diseases.

47 **Introduction**

48 The Janus kinase (JAK)/signal transducer and activator of transcription (STAT) signaling  
49 system is of central importance for several critical physiological processes including  
50 development, tissue homeostasis, and immune responses [1]. Various cytokines, growth  
51 factors, and related signaling compounds signal via this evolutionarily conserved system  
52 [2]. The JAK/STAT signaling pathway effectively transduces external signals into desired  
53 cellular responses despite having relatively few essential components. Signaling via this  
54 pathway is therefore straightforward and allows environmental factors to directly  
55 influence transcriptional activity in cells, thereby linking important biological processes  
56 with environmental cues [3]. Moreover, JAK/STAT signaling is tightly associated with a  
57 great variety of immune responses. JAK/STAT signaling acts downstream of a plethora of  
58 cytokines that transmit immune-related information and is, therefore, a central hub in  
59 various immunocompetent cells [4-7]. Deregulation of this signaling pathway is directly  
60 linked with numerous human diseases, including cancer and inflammatory diseases [5, 8,  
61 9].

62 Lung diseases are often associated with deregulated JAK/STAT signaling. Such  
63 deregulation can arise due to mutations and polymorphisms in genes associated with  
64 JAK/STAT signaling. In addition, this signaling is activated by stressors, infections, and  
65 injuries. This might cause sustained chronic inflammation of the airways and/or alveoli,  
66 which is closely associated with the onset and chronification of various lung diseases.

67 Chronic obstructive pulmonary disease (COPD), asthma, idiopathic pulmonary fibrosis,  
68 and lung cancer are causally associated with deregulated JAK/STAT signaling [10]. This  
69 signaling is not only of great importance during organ development, but also plays a  
70 central role in maintaining tissue and immune homeostasis, especially in response to  
71 stressors, infection, and damage [11, 12]. Functional JAK/STAT signaling is required to  
72 cope with stressful stimuli such as hyperoxia in the airway epithelium [10]. Deregulation  
73 of this signaling in the airways is associated with pathological states. Specifically,  
74 chronically reduced JAK/STAT signaling is associated with impaired repair capacities [11],  
75 while increased JAK/STAT signaling leads to cell proliferation that can cause cancer [13].  
76 Despite its simple general organization, the JAK/STAT signaling pathway is characterized  
77 by multiple redundancies in vertebrates. A multitude of elements function at each level  
78 of the JAK/STAT signaling pathway; for example, more than 50 cytokines can activate this  
79 pathway [6]. Moreover, deregulation of JAK/STAT signaling in different motile and  
80 resident cell types found in the lungs is associated with chronic lung diseases. Therefore,  
81 models with a much simpler JAK/STAT pathway and a less complicated cellular  
82 composition in the airways should help to elucidate the effects of dysfunctional JAK/STAT  
83 signaling, especially in airway epithelial cells.

84 Simple models such as the fruit fly *Drosophila melanogaster* are thus a reasonable  
85 alternative to analyze the relevance of JAK/STAT signaling in the airways. While this  
86 signaling pathway exhibits broad diversification at all levels in mammals, it involves a

87 single receptor (Domeless), one JAK (Hopscotch), and one STAT transcription factor  
88 (Stat92E) in *Drosophila* [2, 14]. This low level of redundancy offers a unique advantage to  
89 investigate the JAK/STAT pathway in tissues of interest. JAK/STAT signaling is highly  
90 important for many processes, including development, in flies. The tracheal system does  
91 not form when JAK/STAT signaling is abolished in tracheal primordia [15, 16]. Unpaired  
92 (Upd), a major ligand of this pathway, is expressed in tracheal pits and initiates JAK/STAT  
93 signaling in this organ primordium [17]. A lack of JAK/STAT signaling during very early  
94 phases of tracheal development leads to a lack of expression of developmentally relevant  
95 genes such as trachealess (*trh*), which is essential to instruct important phases of tracheal  
96 development including cell movement and elongation, as well as invagination processes  
97 that lead to tube formation [15, 18]. This is consistent with the important role of JAK/STAT  
98 signaling during lung development in vertebrates [19, 20].

99 The current study aimed to determine the physiological significance of JAK/STAT signaling  
100 in a simple, but fully functional, airway system. Therefore, we studied the larval airway  
101 system of the fruit fly *D. melanogaster* and evaluated if the JAK/STAT signaling pathway is  
102 active in functional airway epithelial cells and if stress signals modify the activity of this  
103 pathway. Furthermore, we investigated if deregulation of this pathway leads to disease-  
104 associated phenotypes in this simple airway system.

105

106 **Results**

107 The JAK/STAT pathway is strongly activated in the trachea during embryogenesis and is  
108 important for organ development [21]. However, the exact pattern of its activation is  
109 unclear. In this study, we used the *Stat92E-GFP* reporter [21] to monitor activation of the  
110 JAK/STAT pathway concurrently with *btl>LacZ.nls* [22], which specifically labels the trachea.  
111 Figure 1A schematically depicts the JAK/STAT pathway in *Drosophila*. Activation of the  
112 *Stat92E* was enhanced in a central region in the trachea, mainly in the transverse  
113 connective area (Fig. 1B–D). To confirm the importance of the JAK/STAT pathway in the  
114 development of the *Drosophila* respiratory system, we manipulated its activity in the  
115 trachea by driving expression of a dominant-negative isoform of Domeless (*Dome.DN*)  
116 using *btl-Gal4*. Although some animals grew to the larval stage, all died before reaching  
117 the pupal stage (Fig. 1E). Microscopic analysis of surviving larvae showed that the dorsal  
118 trunk (DT) was absent (Fig. 1E’). Time-lapse imaging of trachea-specific *Dome.DN*  
119 expression in embryos revealed that all tracheal segments were fused at stage 15;  
120 however, the DT subsequently separated (Fig. 1F and H). Next, we tested the effects of  
121 ectopic activation of the JAK/STAT pathway induced by expression of the ligand (Upd3) or  
122 the constitutively active JAK-allele (Hop.CA) on tracheal development. These animals died  
123 prematurely at the embryo or larval stage (Fig. 1E). Microscopic analysis of larvae and  
124 embryos showed that the tracheal segment separated at the larval stage (Fig. 1E’’–E’’’’);  
125 however, the disconnection of segments was due to failure of their fusion at the beginning  
126 of tracheal development (Fig. 1G and H). In contrast with animals that expressed *upd3*,

127 most *Hop.CA*-expressing animals exhibited a full tracheal tree. However, they all died at  
128 the first larval stage, which indicates that JAK/STAT signaling influences tracheal  
129 development after the first tracheal structures have formed.

130 To determine if the JAK/STAT pathway also operates in functional airway epithelium,  
131 namely, the larval tracheal system, we used the STAT reporter line mentioned above. STAT  
132 signaling was active in all regions of the tracheal system in third instar larvae (Fig. 2A).  
133 JAK/STAT activity was reduced in the posterior zone of the trachea, tenth tracheal  
134 metamere (Tr10), where cells progressively undergo apoptosis in response to trachea  
135 metamorphosis (Fig. 2B). However, JAK/STAT activity was much stronger in regions such  
136 as Tr2, spiracular branch (SB) and dorsal branch (DB), where cells re-enter the cell cycle at  
137 this developmental stage than in nearby areas containing quiescent cells (Fig. 2C and D).

138 We next evaluated if JAK/STAT activity is observed in airway epithelial cells of adults. The  
139 same approach detected substantial reporter activity in airway epithelial cells of fully  
140 developed adults (Fig. 2E and E'). Inhibition of JAK/STAT signaling changed the fate and  
141 morphology of larval airway epithelial cells (Fig. 2F). This inhibition was achieved by  
142 ectopically expressing *Dome.DN*. These cells gradually lost their typical shape, and  
143 apoptotic processes were initiated 2 days after induction of ectopic expression. This  
144 induction of apoptosis was confirmed by detection of Dcp1 in cells with typical apoptotic  
145 features (Fig. 2G and H). Apoptosis was induced to an even greater extent (and faster) in  
146 stem cells of the larval tracheal system, where Dcp1-positive cells were observed on 1 day



147 after induction of ectopic *Dome.DN* expression (Fig. 2I–K). The JAK/STAT pathway was  
148 activated throughout the entire tracheal system. Therefore, we evaluated expression of  
149 the three Upd ligands in this system. Experiments using the corresponding enhancer-*Gal4*  
150 lines demonstrated that *upd2* was highly expressed in the tracheal system (Fig. S1).  
151 To elucidate the effects of JAK/STAT deregulation in the tracheal system initiated at  
152 different time points during larval development, we employed the temperature-inducible  
153 Gal4/Gal80[ts] system (Fig. 3A). We first tested the effects of inhibition of the tracheal  
154 JAK/STAT pathway induced by ectopic expression of *Dome.DN* on survival and larval  
155 structure (Fig. 3B). Ectopic expression was initiated at three time points during larval  
156 development (Fig. 3B). Larval mortality was higher, the earlier expression was initiated.  
157 No larvae survived to the pupal stage (Fig. 3C). On the other hand, activation of JAK/STAT  
158 signaling induced by ectopic expression of *upd3* or *Hop.CA* led to lower levels of larval  
159 death. In both cases, no pupae developed into adults. Furthermore, we analyzed the  
160 effects of this intervention on tracheal structure. Whereas *Dome.DN* overexpression  
161 elicited only minor effects on tracheal structure, *upd3* or *Hop.CA* overexpression caused  
162 substantial epithelial thickening (Fig. 3D–H). Quantitative evaluation revealed that ectopic  
163 overexpression of *Hop.CA* greatly increased epithelial thickness (Fig. 3H). Experiments  
164 involving mosaic expression of *Hop.CA* driven by *vvl-FLP*, *CoinFLP-Gal4*, *UAS-EGFP (vvl-coin)*  
165 demonstrated that this effect was cell-autonomous. Cells that expressed *Hop.CA* were  
166 much thicker than neighboring cells that did not (Fig. 3I). Treatment with various JAK

167 inhibitors [23] reversed epithelial thickening induced by ectopic overexpression of *Hop.CA*  
168 in the trachea (Fig. 3J–L). Treatment with Baricitinib, Oclacitinib, or Filgotinib reduced  
169 epithelial thickening by more than 60% (Fig. 3L).

170 To elucidate the mechanisms underlying this structural response, we analyzed the  
171 phenotype in more detail. The length of a defined area of the tracheal system (between  
172 Tr8 and Tr9), the length-thickness product, and the cell number were quantified (Fig. 4A  
173 and B). Length was unaffected by manipulation of JAK/STAT signaling in the trachea, with  
174 the exception that it was reduced after 4 days of ectopic *Dome.DN* expression (Fig. 4B).  
175 Consequently, the length-thickness product mirrored the findings made when assessing  
176 thickness. However, the number of cells in the Tr8-Tr9 region of the trachea with  
177 manipulated JAK/STAT signaling was similar to that in matching controls (Fig. 4B’). Hence,  
178 the thickening was due to an increase in cell volume, not an increase in cell number. To  
179 determine if this thickening is an artifact caused by the isolation method, we directly fixed  
180 the trachea in situ or isolated it in cell culture medium with the same osmolarity as  
181 hemolymph. The same thickening was observed in both cases (Supplemental Fig. 2). To  
182 quantify the time course of this thickening, we subjected the trachea to different  
183 treatment regimens prior to analysis. At least 2 days of ectopic expression were necessary  
184 to induce this phenotype (Fig. 4C–E).

185 After demonstrating that JAK/STAT signaling operates in a fully functional tracheal system  
186 and that deregulation of its activation substantially impacts the structure of the airway

187 system, we aimed to identify conditions under which JAK/STAT signaling activity is  
188 increased. To this end, we subjected flies to two stressful conditions that are related to  
189 the airway system, namely, cigarette smoke exposure and hypoxia. Whereas hypoxia did  
190 not affect the activities of the JAK/STAT pathway reporter or the corresponding ligands  
191 (Upd2 (Fig. 5D–F) and Upd3 (Fig. 5J–L)), smoke exposure induced expression of both *upd2*  
192 and *upd3* as well as activation of the JAK/STAT pathway reporter (Fig. 5A–C, F–I, and L).  
193 Induced expression was mostly confined to a highly sensitive region close to the spiracles  
194 (Tr9 and Tr10) (Fig. 5B, F, H, and L).

195 To investigate the molecular mechanisms underlying the effects of chronic JAK/STAT  
196 activation on the airways, we performed RNA-sequencing analysis of tracheal cells  
197 expressing *Hop.CA* in third instar larvae. The validity of this experimental procedure was  
198 supported by the induced expression of *hopscotch* (including *Hop.CA*) and *Socs36E* (one  
199 of the best-characterized Stat92E target genes) [21], which were upregulated 35-fold and  
200 2.7-fold, respectively ( $p < 10^{-12}$ ). Principal component analysis of biological replicates  
201 separated control and overexpression samples into different groups (Fig. 6A, middle).  
202 Finally, the expression of 2004 genes was statistically significantly regulated, with 1128  
203 downregulated genes and 876 upregulated genes ( $p < 0.05$ ). A circular heatmap of 707  
204 differentially expressed genes ( $p < 0.01$  and fold change  $> 2$ ) is presented (Fig. 6A).  
205 Moreover, we analyzed changes in expression upon ectopic silencing of the JAK/STAT  
206 pathway using *Dome.DN*. A Venn diagram revealed that there was a statistically significant

207 overlap in the cohorts of genes regulated by both interventions (Fisher's exact test,  $p <$   
208 0.0001; Fig. 6B).

209 To further elucidate the molecular mechanisms functioning in the thickened epithelium,  
210 we performed promotor scan studies and Gene Ontology (GO) analyses. Genes with the  
211 highest rates of induction supported by the lowest p-values were subjected to promoter  
212 scanning (Pscan) analysis. Putative genes directly regulated by the JAK/STAT pathway were  
213 identified (Tables 1 and 2). Among these highly regulated genes, the largest group  
214 contained genes that encoded products involved in innate immunity, including seven  
215 antimicrobial peptide genes (*IM1*, *IM2*, *IM4*, *IM14*, *CG5791*, *CG5778*, and *Drs*). All these  
216 antimicrobial peptides, except for *Drs*, contain one or two CXXC regions. These CXXC-  
217 containing peptides belong to the family of Bomanins, whose expression is highly induced  
218 following bacterial or fungal infection, and high levels of the corresponding mature  
219 peptides are found in the hemolymph of infected flies [24].

220 Next, we analyzed all significantly regulated genes based on KEGG and GO annotations.  
221 Six terms in KEGG pathway analysis and nine categories in GO analysis were enriched  
222 among these genes according to their predicted functions (Table S1 and Fig. 7).

223 One striking feature of the epithelium with chronically activated JAK/STAT signaling was  
224 induced expression of genes involved in vesicle-mediated transport (Fig. 7). GO analysis  
225 demonstrated that this term was enriched among 32 regulated genes that had been  
226 assigned to vesicle-mediated transport. All these genes were upregulated, except for one

227 (CG5946). However, according to a Pscan analysis, these genes did not seem to be direct  
228 JAK/STAT targets since a Stat92E promoter binding was not enriched (table S2 and S3). The  
229 transcript levels of genes related to epicuticle development were reduced. Fifty-five genes  
230 relevant to cuticle development were regulated, of which 40 were downregulated. In  
231 addition, other biological processes such as muscle cell differentiation, cellular protein-  
232 containing complex assembly, RNA processing, translation, and detection of chemical  
233 stimuli were significantly enriched. In the latter three categories, the number of  
234 upregulated genes was similar to the number of downregulated genes. A schematic  
235 representation of the different biological processes superimposed on a scheme of an  
236 epithelial cell is shown (Fig. 7B). One interesting result was that endocytosis and vesicle-  
237 mediated transport were impaired. To analyze this further, we focused on two peripheral  
238 membrane-binding proteins, namely, Coracle (Cora), a component of septate junctions  
239 and Armadillo (Arm), a component of adherens junctions. Both proteins depend on vesicle  
240 transport to reach their destinations [25, 26] (Fig. 8A). Immunofluorescence analysis of  
241 *Hop.CA*-overexpressing animals revealed that Arm and Cora accumulated in the cytoplasm,  
242 which is indicative of dysfunctional endosomal transport (Fig. 8B–E). We also observed a  
243 stenosis phenotype with tube narrowing. This arose when epithelial cells expressed  
244 *Hop.CA* at very high levels, as indicated by strong green fluorescence (Fig. 8F and G and  
245 Fig. S2). The lumen narrowing observed here is reminiscent of the phenotype caused by

246 mutations of the coatamer protein complex (COP)I or COPII complexes, which are  
247 required for the efficient secretion of proteins that drive tube expansion [27, 28] (Fig. 8H).  
248 Cuticle development was identified as another regulated biological process based on  
249 transcriptome data. This process is dependent on secretion in the larval trachea, and  
250 chitin-rich structures, called taenidia, are believed to make tubes flexible as well as  
251 sufficiently strong in order to avoid collapse [29]. The chitin structure in the trachea was  
252 unsorted in *Hop.CA*-expressing animals compared with control tubes (Fig. 9A and B).  
253 Chitin staining revealed that the highly organized structure of the chitinous intima was  
254 almost completely lost in *Hop.CA*-expressing animals (Fig. 9C). Mosaic analysis  
255 demonstrated that the trachea was structurally disorganized where *Hop.CA* was expressed  
256 (Fig. 9D–F).  
257 The effects of activating the JAK/STAT pathway on the epithelium were time-dependent.  
258 To determine if a weaker expression of *Hop.CA* induces similar phenotypes, we used  
259 another trachea-specific Gal4-driver, namely, PPK4 (also called *nach-Gal4*). In the *nach-*  
260 *Gal4* line, *Gal4* is expressed from the late embryo stage, is strongly expressed in the early  
261 L1 and late L2 stages, at which point expression is stronger than that driven by *btl-Gal4*,  
262 but is weakly expressed at other larval stages [30, 31]. Microscopy analysis of the trachea  
263 showed that weak expression of *Hop.CA* in the trachea promoted epithelial thickening (Fig.  
264 10A and B). However, epithelial thickening after 4 days of *Hop.CA* induction was slightly  
265 lower in *nach>Hop.CA* than in *btl>Hop.CA* (Fig. 10D). On the other hand, weakly driven

266 *upd3* expression in the trachea resulted in identical changes as those observed using *btl-*  
267 *Gal4* (Fig. 10C and E). Finally, we used the same driver to inhibit JAK/STAT signaling in the  
268 trachea by expressing *Dome.DN*. Animals died prematurely at the larval stage and their  
269 tracheas were filled with liquid, demonstrating that functionality was impaired (Fig. 10F).

270

## 271 **Discussion**

272 The present study aimed to elucidate the significance of the JAK/STAT signaling pathway  
273 in the respiratory epithelium. We used the fruit fly *D. melanogaster* owing to the  
274 experimental advantages of this system and the unique simplicity of the JAK/STAT  
275 signaling pathway. JAK/STAT signaling exhibited tonic activity in almost all respiratory  
276 epithelial cells and its activity was substantially enhanced by exposure to cigarette smoke.  
277 Stress-induced induction of the JAK/STAT signaling pathway and the corresponding  
278 cytokines is also observed in primary human respiratory epithelial cells, suggesting that  
279 the activation and mechanism-of-action of JAK/STAT signaling are similar in human and  
280 *Drosophila* respiratory epithelial cells [32]. Our finding that the JAK/STAT signaling  
281 pathway operated in airway epithelial cells of embryos, larvae, and adults implies that it  
282 plays a central role in these cells at all developmental stages. The JAK/STAT pathway was  
283 previously reported to be important for embryonic development of the tracheal system  
284 [33]. We clarified the sequence of developmental steps in which this signaling pathway  
285 plays a central role. The JAK/STAT signaling pathway is particularly important for

286 development and maintenance of the DT. Tracheal JAK/STAT signaling is required during  
287 development of the adult tracheal system at the pupal stage [34]. This is consistent with  
288 our finding that the various interventions induced lethality in the pupal stage at the latest.  
289 It is a matter of debate whether JAK/STAT signaling is essential for mammalian lung  
290 development. However, the prevailing view that JAK/STAT signaling is not essential for  
291 embryonic lung development [11] has been challenged by recent studies [20]. Although  
292 JAK/STAT signaling is essential for different aspects of tracheal development, the major  
293 focus of the current study was on the role of this signaling in maintaining homeostasis in  
294 the fully functional airway epithelium. Therefore, we chose *Drosophila* larvae as a model  
295 because they possess fully functional airways that must perform gas exchange for survival  
296 and growth of the animal. Respiratory epithelial cells in larvae are terminally  
297 differentiated and cannot divide, but increase in size as larvae grow. We demonstrated  
298 that the JAK/STAT signaling pathway was essential in the larval airway epithelium and that  
299 its blockade induced apoptosis. This implies that the JAK/STAT pathway plays a central role  
300 in homeostatic processes in this organ, which also appears to be the case in mammalian  
301 airway epithelia. Perturbation of JAK/STAT signaling induces apoptosis in cell lines derived  
302 from airway epithelia [35], and this seems to be particularly relevant for growing tissues  
303 and cells that can still divide or grow [36]. This ability to grow might be one reason for the  
304 high susceptibility of *Drosophila* airway epithelial cells to blockade of JAK/STAT signaling.  
305 Thus, cytokines that activate the JAK/STAT signaling pathway act as survival factors at least



306 in part, especially where repair mechanisms are operative. Functional JAK/STAT signaling  
307 is also required for regenerative processes after epithelial damage [11, 12], the response  
308 to infections [37], and the reaction to hyperoxia [38]. This indicates that JAK/STAT signaling  
309 in mammalian airway epithelial cells and the *Drosophila* trachea is particularly relevant  
310 for a protective reaction to stressful stimuli. Consistently, we demonstrated that JAK/STAT  
311 signaling was normally active in airway epithelial cells of *Drosophila* larvae. A basal level  
312 of JAK/STAT signaling was observed in these cells and this signaling was further activated  
313 in response to very strong stressors such as chronic exposure to smoke particles. There  
314 appears to be an organ-autonomous JAK/STAT signaling system, with expression and  
315 release of the cytokines Upd2 and Upd3, and activation of a JAK/STAT-dependent response  
316 induced in the same regions of the tracheal system. A comparable, stress-induced system  
317 has been identified in the intestinal epithelium of flies, where highly stressful insults  
318 targeting absorptive enterocytes induce production and release of the cytokine Upd3 [39,  
319 40]. In contrast with the intestines, where cytokines produced by stressed enterocytes  
320 induce proliferation of stem cells to replenish the enterocyte pool, the typical structure of  
321 epithelial cells in the tracheal system is altered without activation of stem cells.  
322 Although a threshold level of JAK/STAT signaling is required for the functionality and  
323 survival of airway epithelial cells, excessive activation of this signaling is associated with  
324 several lung diseases including lung cancer, acute lung injury, asthma, pulmonary fibrosis,  
325 and COPD [13, 41-45]. This implies that different facets of this highly complex signaling

326 pathway are critically involved in the development of the majority of chronic lung diseases.  
327 Thus, maintaining homeostasis in the airway epithelium, especially with respect to its  
328 potential damage and repair, is essential for a healthy life. In this context, the JAK/STAT  
329 pathway seems to play a decisive role [11]. To study the imbalance of JAK/STAT signaling  
330 that is causally associated with the majority of chronic lung diseases and is responsible for  
331 the structural changes typically seen in these diseases, we ectopically activated JAK/STAT  
332 signaling specifically in the airway epithelium of *Drosophila* larvae. This activation induced  
333 major structural changes in the airway epithelium, mainly to the architecture of tracheal  
334 cells. Mosaic analysis demonstrated that this effect was cell-autonomous. These major  
335 structural changes of the trachea are reminiscent of those observed in asthma, COPD,  
336 acute lung injury, and lung cancer. Structural changes that permit to fulfill the original  
337 function of epithelial cells are often observed during the epithelial-to-mesenchymal  
338 transition. JAK/STAT signaling is essential for the epithelial-to-mesenchymal transition  
339 intrinsic to lung cancer [46].  
340 Ectopic JAK/STAT pathway activation induced complex alterations to the transcriptome in  
341 airway epithelial cells. These changes affected immune-relevant genes such as those  
342 encoding antimicrobial peptides, mainly from the Bomanin family. JAK/STAT signaling  
343 typically regulates antimicrobial responses in the human airway epithelium [41]. However,  
344 chronically activated JAK/STAT signaling perturbed secretory processes and the formation  
345 of extracellular structures. The extracellular matrix defects caused by *Hop.CA*

346 overexpression are reminiscent of the pathophysiology of the aforementioned chronic  
347 lung diseases that involve responses to acute or chronic injury [47]. Therefore, attempts  
348 to enhance the repair capacities of epithelial cells by inducing structural changes via  
349 excessive JAK/STAT signaling would also perturb normal cellular functions, such as the  
350 transport of junction proteins to the membrane. This would lead to reduced barrier  
351 function of the epithelium, which is a hallmark of chronic lung diseases such as asthma  
352 and COPD [48-50]. We also observed epicuticular changes, which considerably influenced  
353 the structure of the whole organ. However, it is difficult to identify an equivalent change  
354 in vertebrates.

355 The JAK/STAT pathway is an excellent target for therapeutic intervention in many lung  
356 diseases, including asthma, COPD, acute lung injury, idiopathic pulmonary fibrosis, and  
357 lung cancer [43, 51-55]. We demonstrated that pharmacological interference of the  
358 JAK/STAT signaling pathway reverted the structural phenotype observed upon ectopic  
359 activation of this signaling and consequently flies survived. This shows that the *Drosophila*  
360 model is not only suitable to study the structural effects of excessive JAK/STAT signaling  
361 and the underlying molecular mechanisms, but also to screen compounds and thereby  
362 identify novel therapeutic strategies.

363 It must be remembered that the vertebrate lung and insect trachea are not homologous.  
364 Nevertheless, they share a high degree of similarity in terms of their development,  
365 physiology, innate immunity, and operative signaling systems [56, 57]. Therefore, the fruit

366 fly is a very valuable tool to study genes associated with a great variety of chronic lung  
367 diseases including asthma, COPD, and lung cancer [58-63]. This simple model can be used  
368 as part of an experimental toolbox to elucidate the role of JAK/STAT signaling in the  
369 airways and the effects of chronic deregulation of this signaling. In addition, it provides a  
370 readily accessible experimental system that is amenable to pharmacologic interventions,  
371 and allows hypotheses and intervention strategies to be easily tested.

372

## 373 **Material and Methods**

### 374 ***Drosophila* strains and husbandry**

375 *Stat92E-GFP* was used to monitor the activation of the pathway [21]; the Gal4-UAS system  
376 [64] was used to target ectopic expression to the tracheal system. Gal4 drivers used were:  
377 *btl-Gal4*, *UAS-GFP* on the 3rd chromosome, and *btl-Gal4*, *UAS-GFP* on the 2nd  
378 chromosome (obtained from the Leptin group, Heidelberg, Germany); *upd2-Gal4*; *upd3-*  
379 *Gal4* [60]; *nach-Gal4* [30]. The UAS responders included: *UAS-LacZ.nls* (BDSC 3956), *UAS-*  
380 *domeΔcyt2.1* (*UAS-Dome.DN*) and *UAS-Hop.CA* (*UAS-hopTumL*) were obtained from N.  
381 Perrimon [15, 65]. The *UAS-upd3* was constructed in our lab. *TubP-Gal80[ts]* (BDSC 7018)  
382 were obtained from the Bloomington stock center. Unless otherwise stated, the flies were  
383 raised on standard medium at 25 °C with 50–60% relative humidity under a 12:12 h  
384 light/dark cycle as described earlier [66].

385

386 **Coin-FLP expression system**

387 *Vvl-FLP/CyO; btl-moe.mRFP* (BDSC 64233), *tubP-Gal80[ts]* and *CoinFLP-Gal4, UAS-2xEGFP*  
388 (BDSC 58751) were used to construct animals for the tracheal mosaic analysis. Ventral  
389 veins lacking (*vvl*) was expressed in larval tracheal clones that covered approximately 30  
390 to 80% of the trachea [67, 68]. The genotype of the flies was *vvl-FLP, CoinFLP-Gal4, UAS-*  
391 *2xEGFP/CyO (vvl-coin)* and *vvl-FLP, CoinFLP-Gal4, UAS-2xEGFP/CyO; tub-Gal80[ts] (vvl-*  
392 *coin.ts)*.

393 **Developmental Viability**

394 For developmental viability of eggs, the eggs were collected overnight and were not  
395 physically handled in any way. The number of the hatched eggs and the pupae were  
396 counted starting from two days after the collection. Each group has 4 replicates that  
397 included more than 20 eggs. For developmental viability of larvae, *tub-Gal80[ts]* was used  
398 to limit UAS responder expression at the larvae stage. Animals were raised at 18 °C to keep  
399 the UAS responder gene silent. Larvae at different instar stages were transferred to new  
400 medium at 29 °C. In this study, usually 4 replicates were performed with 30 larvae. The  
401 stage of larvae was determined via the appearance of anterior spiracles.

402 **Determination of epithelial thickness**

403 The trachea of L2 and L3 Larvae were carefully dissected out from the posterior side of  
404 the body in PBS. The isolated trachea was immersed in 50% glycerol and digital images  
405 captured within 15 min. L2 Larvae were distinguished from L3 larvae by the appearance

406 of anterior spiracles. The relative ages of L3 larvae were inferred from the size of the  
407 animal. 30 larvae were used in each group and specimens were analysed by Image J.

#### 408 **Drug application and determination of epithelial thickness**

409 JAK inhibitors (Baricitinib #16707 , Oclacitinib #18722, Filgotinib #17669 - Cayman  
410 Chemicals, Michigan, USA) were diluted in DMSO [100 mM]. For later application the  
411 inhibitors were diluted 1:10 in 100% EtOH. We used 20 µl of each diluted inhibitor for 2  
412 ml of concentrated medium (5% yeast extract, 5% corn flour, 5% sucrose, 1% low-melt  
413 agarose, 1 ml of 10% propionic acid and 3 ml of 10% Nipagin). The eggs of each crossing  
414 have been applicated on the modified medium and kept at 20 °C until the larvae reach  
415 the L2 stage. Afterwards they were incubated at 30 °C for 2 days to induce the *btl-Gal4*,  
416 *UAS-GFP; tub-Gal80[ts] (btl.ts)* –driver. The trachea of L3 Larvae were carefully dissected  
417 out from the posterior side of the body in the PBS. Isolated trachea was immersed in 50%  
418 glycerol and digital images captured in 15 min. 10 larvae were used for each group.

#### 419 **Time-lapse microscopy**

420 All images were acquired using a ZEISS Axio Image Z1 fluorescent microscope. Embryos  
421 were dechlorinated in 3% sodium hypochlorite and immersed in Halocarbon oil 700  
422 (Sigma Aldrich, 9002-83-9). Then the embryos were imaged after stage 15 when the  
423 tracheal tree formed at 3 hours intervals.

#### 424 **Cigarette smoke and hypoxic exposure**

425 All cigarette smoke exposure experiments were carried out in a smoking chamber,  
426 attached to a diaphragm pump. Common research 3R4F cigarettes (CTRP, Kentucky  
427 University, Lexington, USA) were used for all experiments. The vials containing animals  
428 were capped with a monitoring grid to allow the cigarette smoke to diffuse into the vial.  
429 For long-time smoke experiments, L2 larvae were exposed to smoke three times a day for  
430 30 min each, on two consecutive days. For heavy smoke experiments, L3 larvae were  
431 exposed to 2 cigarettes smoke one time for 45 min, which led to about 35-50% mortality.  
432 To study the effects of hypoxia on the activity of JAK/STAT signalling pathway, larvae were  
433 exposed to long-term hypoxia and short-term hypoxia separately. For long-term hypoxia  
434 experiments, L2 larvae were exposed to 5% oxygen three times a day for 30 min each, on  
435 two consecutive days. For short-term hypoxia experiments, L3 larvae were exposed to 1%  
436 oxygen once for 5 hours.

#### 437 **Antibody and tracheal stains**

438 Larvae were dissected by ventral filleting and fixed in 4% paraformaldehyde for 30 min.  
439 Embryos were staged according to Campos-Ortega and Hartenstein [69] and fixed in 4%  
440 formaldehyde for 30 min. Immunostaining followed standard protocols as described  
441 earlier [70, 71]. GFP signals were amplified by immunostaining with polyclonal rabbit anti-  
442 GFP (used at 1:500, Sigma-Aldrich, Merck KGaA, Darmstadt, Germany, SAB4301138). 40-  
443 1a (used at 1:50, DSHB, Iowa City, USA) was used to detect Beta-galactosidase. Coracle  
444 protein was detected with a monoclonal mouse anti-coracle antibody (used at 1:200,

445 DSHB, Iowa City, USA, C566.9). Armadillo protein was detected with a monoclonal mouse  
446 anti-armadillo antibody (DSHB, US, N2 7A1, used at 1:500). A monoclonal rabbit Cleaved  
447 *Drosophila* Dcp1 (used at 1:200, Cell Signaling, Frankfurt/M, Germany, #9578) was used  
448 to detect apoptotic cells. Secondary antibodies used were: Cy3-conjugated goat-anti-  
449 mouse, Cy3-conjugated goat-anti-rabbit, Alexa488-conjugated goat-anti-mouse (Jackson  
450 Immunoresearch, Dianova, Hamburg, Germany), Alexa488-conjugated goat-anti-rabbit  
451 (used at 1:500, Cell signaling, Frankfurt/M, Germany, #9578). Tracheal chitin was stained  
452 with 505 star conjugated chitin-binding probe (NEB, Germany, used at 1:300). Nuclei were  
453 stained with 4',6-Diamidino-2-Phenylindole, Dihydrochloride (DAPI) (Roth, Karlsruhe,  
454 Germany, 6843). Specimens were analyzed and digital images captured either with a  
455 confocal (CLSM Leica TCS SP1, Leica, Wetzlar, Germany) or a conventional fluorescence  
456 microscope (ZEISS Axio Imager Z1, Zeiss, Oberkochen, Germany), respectively.

#### 457 **RNA isolation and RNA sequencing**

458 For the gene expression analysis of 3rd instar larvae trachea, animals were dissected in  
459 cold PBS and isolated trachea transferred to RNA Magic (BioBudget, Krefeld, Germany)  
460 and processed essentially as described earlier [60] with slight modifications. The tissue  
461 was homogenized in a Bead Ruptor 24 (BioLab products, Beverly, MA, USA) and the  
462 RNA was extracted by using the PureLink RNA Mini Kit (Thermo Fisher, Waltham, MA, USA)  
463 for phase separation with the RNA Magic reagent. An additional DNase treatment was



464 performed following the on-column PureLink DNase treatment protocol (Thermo Fisher,  
465 Waltham, MA, USA).

466 Sequencing libraries were constructed using the TruSeq stranded mRNA kit (Illumina, San  
467 Diego, USA) and 50 bp single-read sequencing was performed on an Illumina HiSeq 4000  
468 with 16 samples per lane. Resulting sequencing reads were trimmed for low-quality bases  
469 and adapters using the fastq Illumina filter  
470 ([http://cancan.cshl.edu/labmembers/gordon/fastq\\_illumina\\_filter/](http://cancan.cshl.edu/labmembers/gordon/fastq_illumina_filter/)) and cutadapt  
471 (version 1.8.1) [72]. Transcriptomics analysis including gene expression values and  
472 differential expression analysis was done using CLC Genomics Workbench. The detailed  
473 protocols can be obtained from the CLC Web site ([http://www.clcbio.com/products/clc-](http://www.clcbio.com/products/clc-genomics-workbench)  
474 [genomics-workbench](http://www.clcbio.com/products/clc-genomics-workbench)). *Drosophila melanogaster* reference genome (Release 6) [73] was  
475 used for mapping in this research.

476 The transcription factor binding site enrichment and the Gene Ontology enrichment  
477 analyses of the differentially expressed genes were carried out using Pscan and Panther,  
478 respectively. Data was visualized through the circos software.

479

## 480 References

481

- 482 1. Rawlings JS, Rosler KM, Harrison DA: **The JAK/STAT signaling pathway**. *J Cell Sci* 2004, **117**(Pt  
483 8):1281-1283.
- 484 2. Zeidler MP, Bausek N: **The *Drosophila* JAK-STAT pathway**. *JAKSTAT* 2013, **2**(3):e25353.
- 485 3. Yan R, Small S, Desplan C, Dearolf CR, Darnell JE, Jr.: **Identification of a Stat gene that functions in**  
486 ***Drosophila* development**. *Cell* 1996, **84**(3):421-430.

- 487 4. Shuai K, Liu B: **Regulation of JAK-STAT signalling in the immune system.** *Nat Rev Immunol* 2003,  
488 **3(11):900-911.**
- 489 5. Villarino AV, Kanno Y, Ferdinand JR, O'Shea JJ: **Mechanisms of Jak/STAT signaling in immunity**  
490 **and disease.** *J Immunol* 2015, **194(1):21-27.**
- 491 6. Villarino AV, Kanno Y, O'Shea JJ: **Mechanisms and consequences of Jak-STAT signaling in the**  
492 **immune system.** *Nat Immunol* 2017, **18(4):374-384.**
- 493 7. Agaisse H, Perrimon N: **The roles of JAK/STAT signaling in Drosophila immune responses.**  
494 *Immunol Rev* 2004, **198:72-82.**
- 495 8. O'Shea JJ, Schwartz DM, Villarino AV, Gadina M, McInnes IB, Laurence A: **The JAK-STAT pathway:**  
496 **impact on human disease and therapeutic intervention.** *Annu Rev Med* 2015, **66:311-328.**
- 497 9. Constantinescu SN, Girardot M, Pecquet C: **Mining for JAK-STAT mutations in cancer.** *Trends*  
498 *Biochem Sci* 2008, **33(3):122-131.**
- 499 10. Pernis AB, Rothman PB: **JAK-STAT signaling in asthma.** *J Clin Invest* 2002, **109(10):1279-1283.**
- 500 11. Tadokoro T, Wang Y, Barak LS, Bai Y, Randell SH, Hogan BL: **IL-6/STAT3 promotes regeneration of**  
501 **airway ciliated cells from basal stem cells.** *Proc Natl Acad Sci U S A* 2014, **111(35):E3641-3649.**
- 502 12. Kida H, Mucenski ML, Thitoff AR, Le Cras TD, Park KS, Ikegami M, Muller W, Whitsett JA: **GP130-**  
503 **STAT3 regulates epithelial cell migration and is required for repair of the bronchiolar**  
504 **epithelium.** *Am J Pathol* 2008, **172(6):1542-1554.**
- 505 13. Dutta P, Sabri N, Li J, Li WX: **Role of STAT3 in lung cancer.** *JAKSTAT* 2014, **3(4):e999503.**
- 506 14. Arbouzova NI, Zeidler MP: **JAK/STAT signalling in Drosophila: insights into conserved regulatory**  
507 **and cellular functions.** *Development* 2006, **133(14):2605-2616.**
- 508 15. Brown S, Hu N, Hombria JC: **Identification of the first invertebrate interleukin JAK/STAT receptor,**  
509 **the Drosophila gene domeless.** *Curr Biol* 2001, **11(21):1700-1705.**
- 510 16. Perrimon N, Mahowald AP: **I(1)hopscotch, A larval-pupal zygotic lethal with a specific maternal**  
511 **effect on segmentation in Drosophila.** *Dev Biol* 1986, **118(1):28-41.**
- 512 17. Harrison DA, McCoon PE, Binari R, Gilman M, Perrimon N: **Drosophila unpaired encodes a**  
513 **secreted protein that activates the JAK signaling pathway.** *Genes Dev* 1998, **12(20):3252-3263.**
- 514 18. Isaac DD, Andrew DJ: **Tubulogenesis in Drosophila: a requirement for the trachealess gene**  
515 **product.** *Genes Dev* 1996, **10(1):103-117.**
- 516 19. Nogueira-Silva C, Santos M, Baptista MJ, Moura RS, Correia-Pinto J: **IL-6 is constitutively**  
517 **expressed during lung morphogenesis and enhances fetal lung explant branching.** *Pediatr Res*  
518 2006, **60(5):530-536.**
- 519 20. Piai P, Moura RS, Baptista MJ, Correia-Pinto J, Nogueira-Silva C: **STATs in Lung Development:**  
520 **Distinct Early and Late Expression, Growth Modulation and Signaling Dysregulation in**  
521 **Congenital Diaphragmatic Hernia.** *Cell Physiol Biochem* 2018, **45(1):1-14.**
- 522 21. Bach EA, Ekas LA, Ayala-Camargo A, Flaherty MS, Lee H, Perrimon N, Baeg GH: **GFP reporters**  
523 **detect the activation of the Drosophila JAK/STAT pathway in vivo.** *Gene Expr Patterns* 2007,  
524 **7(3):323-331.**
- 525 22. Shiga Y, M. TM, Hayashi S: **A nuclear GFP/β - galactosidase fusion protein as a marker for**  
526 **morphogenesis in living Drosophila.** *Development, Growth & Differentiation* 1996, **38:99-106.**

- 527 23. Roskoski R, Jr.: **Janus kinase (JAK) inhibitors in the treatment of inflammatory and neoplastic**  
528 **diseases.** *Pharmacol Res* 2016, **111**:784-803.
- 529 24. Lindsay SA, Lin SJH, Wasserman SA: **Short-Form Bomanins Mediate Humoral Immunity in**  
530 **Drosophila.** *J Innate Immun* 2018, **10**(4):306-314.
- 531 25. Lock JG, Stow JL: **Rab11 in recycling endosomes regulates the sorting and basolateral transport**  
532 **of E-cadherin.** *Mol Biol Cell* 2005, **16**(4):1744-1755.
- 533 26. Oshima K, Fehon RG: **Analysis of protein dynamics within the septate junction reveals a highly**  
534 **stable core protein complex that does not include the basolateral polarity protein Discs large.** *J*  
535 *Cell Sci* 2011, **124**(Pt 16):2861-2871.
- 536 27. Jayaram SA, Senti KA, Tiklova K, Tsarouhas V, Hemphala J, Samakovlis C: **COPI vesicle transport is**  
537 **a common requirement for tube expansion in Drosophila.** *PLoS One* 2008, **3**(4):e1964.
- 538 28. Tsarouhas V, Senti KA, Jayaram SA, Tiklova K, Hemphala J, Adler J, Samakovlis C: **Sequential pulses**  
539 **of apical epithelial secretion and endocytosis drive airway maturation in Drosophila.** *Dev Cell*  
540 2007, **13**(2):214-225.
- 541 29. Glasheen BM, Robbins RM, Piette C, Beitel GJ, Page-McCaw A: **A matrix metalloproteinase**  
542 **mediates airway remodeling in Drosophila.** *Dev Biol* 2010, **344**(2):772-783.
- 543 30. Liu L, Johnson WA, Welsh MJ: **Drosophila DEG/ENaC pickpocket genes are expressed in the**  
544 **tracheal system, where they may be involved in liquid clearance.** *Proc Natl Acad Sci U S A* 2003,  
545 **100**(4):2128-2133.
- 546 31. Wagner C, Isermann K, Roeder T: **Infection induces a survival program and local remodeling in**  
547 **the airway epithelium of the fly.** *Faseb J* 2009, **23**(7):2045-2054.
- 548 32. Kode A, Yang SR, Rahman I: **Differential effects of cigarette smoke on oxidative stress and**  
549 **proinflammatory cytokine release in primary human airway epithelial cells and in a variety of**  
550 **transformed alveolar epithelial cells.** *Respir Res* 2006, **7**:132.
- 551 33. Hombria JC, Sotillos S: **JAK-STAT pathway in Drosophila morphogenesis: From organ selector to**  
552 **cell behavior regulator.** *JAKSTAT* 2013, **2**(3):e26089.
- 553 34. Powers N, Srivastava A: **JAK/STAT signaling is involved in air sac primordium development of**  
554 **Drosophila melanogaster.** *FEBS Lett* 2019, **593**(7):658-669.
- 555 35. Zheng XJ, Yang ZX, Dong YJ, Zhang GY, Sun MF, An XK, Pan LH, Zhang SL: **Downregulation of leptin**  
556 **inhibits growth and induces apoptosis of lung cancer cells via the Notch and JAK/STAT3**  
557 **signaling pathways.** *Biol Open* 2016, **5**(6):794-800.
- 558 36. Quinton LJ, Mizgerd JP: **NF-kappaB and STAT3 signaling hubs for lung innate immunity.** *Cell*  
559 *Tissue Res* 2011, **343**(1):153-165.
- 560 37. Matsuzaki Y, Xu Y, Ikegami M, Besnard V, Park KS, Hull WM, Wert SE, Whitsett JA: **Stat3 is required**  
561 **for cytoprotection of the respiratory epithelium during adenoviral infection.** *J Immunol* 2006,  
562 **177**(1):527-537.
- 563 38. Hokuto I, Ikegami M, Yoshida M, Takeda K, Akira S, Perl AK, Hull WM, Wert SE, Whitsett JA: **Stat-3**  
564 **is required for pulmonary homeostasis during hyperoxia.** *J Clin Invest* 2004, **113**(1):28-37.
- 565 39. Jiang H, Patel PH, Kohlmaier A, Grenley MO, McEwen DG, Edgar BA: **Cytokine/Jak/Stat signaling**  
566 **mediates regeneration and homeostasis in the Drosophila midgut.** *Cell* 2009, **137**(7):1343-1355.

- 567 40. Miguel-Aliaga I, Jasper H, Lemaitre B: **Anatomy and Physiology of the Digestive Tract of**  
568 ***Drosophila melanogaster***. *Genetics* 2018, **210**(2):357-396.
- 569 41. Simeone-Penney MC, Severgnini M, Tu P, Homer RJ, Mariani TJ, Cohn L, Simon AR: **Airway**  
570 **epithelial STAT3 is required for allergic inflammation in a murine model of asthma**. *J Immunol*  
571 2007, **178**(10):6191-6199.
- 572 42. Zhang X, Yue P, Page BD, Li T, Zhao W, Namanja AT, Paladino D, Zhao J, Chen Y, Gunning PT *et al*:  
573 **Orally bioavailable small-molecule inhibitor of transcription factor Stat3 regresses human**  
574 **breast and lung cancer xenografts**. *Proc Natl Acad Sci U S A* 2012, **109**(24):9623-9628.
- 575 43. Yew-Booth L, Birrell MA, Lau MS, Baker K, Jones V, Kilty I, Belvisi MG: **JAK-STAT pathway**  
576 **activation in COPD**. *Eur Respir J* 2015, **46**(3):843-845.
- 577 44. Prele CM, Yao E, O'Donoghue RJ, Mutsaers SE, Knight DA: **STAT3: a central mediator of**  
578 **pulmonary fibrosis?** *Proc Am Thorac Soc* 2012, **9**(3):177-182.
- 579 45. Gao H, Guo RF, Speyer CL, Reuben J, Neff TA, Hoesel LM, Riedemann NC, McClintock SD, Sarma JV,  
580 Van Rooijen N *et al*: **Stat3 activation in acute lung injury**. *J Immunol* 2004, **172**(12):7703-7712.
- 581 46. Liu RY, Zeng Y, Lei Z, Wang L, Yang H, Liu Z, Zhao J, Zhang HT: **JAK/STAT3 signaling is required for**  
582 **TGF-beta-induced epithelial-mesenchymal transition in lung cancer cells**. *Int J Oncol* 2014,  
583 **44**(5):1643-1651.
- 584 47. Fahy JV, Dickey BF: **Airway mucus function and dysfunction**. *N Engl J Med* 2010, **363**(23):2233-  
585 2247.
- 586 48. Georas SN, Rezaee F: **Epithelial barrier function: at the front line of asthma immunology and**  
587 **allergic airway inflammation**. *J Allergy Clin Immunol* 2014, **134**(3):509-520.
- 588 49. Gon Y, Hashimoto S: **Role of airway epithelial barrier dysfunction in pathogenesis of asthma**.  
589 *Allergol Int* 2018, **67**(1):12-17.
- 590 50. Heijink IH, Brandenburg SM, Postma DS, van Oosterhout AJ: **Cigarette smoke impairs airway**  
591 **epithelial barrier function and cell-cell contact recovery**. *Eur Respir J* 2012, **39**(2):419-428.
- 592 51. Milara J, Ballester B, Morell A, Ortiz JL, Escriva J, Fernandez E, Perez-Vizcaino F, Cogolludo A,  
593 Pastor E, Artigues E *et al*: **JAK2 mediates lung fibrosis, pulmonary vascular remodelling and**  
594 **hypertension in idiopathic pulmonary fibrosis: an experimental study**. *Thorax* 2018, **73**(6):519-  
595 529.
- 596 52. Athari SS: **Targeting cell signaling in allergic asthma**. *Signal Transduct Target Ther* 2019, **4**:45.
- 597 53. Loh CY, Arya A, Naema AF, Wong WF, Sethi G, Looi CY: **Signal Transducer and Activator of**  
598 **Transcription (STATs) Proteins in Cancer and Inflammation: Functions and Therapeutic**  
599 **Implication**. *Front Oncol* 2019, **9**:48.
- 600 54. Severgnini M, Takahashi S, Rozo LM, Homer RJ, Kuhn C, Jhung JW, Perides G, Steer M, Hassoun  
601 PM, Fanburg BL *et al*: **Activation of the STAT pathway in acute lung injury**. *Am J Physiol Lung Cell*  
602 *Mol Physiol* 2004, **286**(6):L1282-1292.
- 603 55. Song L, Rawal B, Nemeth JA, Haura EB: **JAK1 activates STAT3 activity in non-small-cell lung**  
604 **cancer cells and IL-6 neutralizing antibodies can suppress JAK1-STAT3 signaling**. *Mol Cancer Ther*  
605 2011, **10**(3):481-494.
- 606 56. Andrew DJ, Ewald AJ: **Morphogenesis of epithelial tubes: Insights into tube formation,**  
607 **elongation, and elaboration**. *Dev Biol* 2010, **341**(1):34-55.

- 608 57. Bergman P, Seyedoleslami Esfahani S, Engstrom Y: **Drosophila as a Model for Human Diseases-**  
609 **Focus on Innate Immunity in Barrier Epithelia.** *Curr Top Dev Biol* 2017, **121**:29-81.
- 610 58. Bossen J, Uliczka K, Steen L, Pfefferkorn R, Mai MM, Burkhardt L, Spohn M, Bruchhaus I, Fink C,  
611 Heine H *et al*: **An EGFR-Induced Drosophila Lung Tumor Model Identifies Alternative**  
612 **Combination Treatments.** *Mol Cancer Ther* 2019, **18**(9):1659-1668.
- 613 59. Levine BD, Cagan RL: **Drosophila Lung Cancer Models Identify Trametinib plus Statin as**  
614 **Candidate Therapeutic.** *Cell Rep* 2016, **14**(6):1477-1487.
- 615 60. Prange R, Thiedmann M, Bhandari A, Mishra N, Sinha A, Hasler R, Rosenstiel P, Uliczka K, Wagner  
616 C, Yildirim AO *et al*: **A Drosophila model of cigarette smoke induced COPD identifies Nrf2**  
617 **signaling as an expedient target for intervention.** *Aging (Albany NY)* 2018, **10**(8):2122-2135.
- 618 61. Kallsen K, Zehethofer N, Abdelsadik A, Lindner B, Kabesch M, Heine H, Roeder T: **ORMDL**  
619 **deregulation increases stress responses and modulates repair pathways in Drosophila airways.**  
620 *J Allergy Clin Immunol* 2015, **136**(4):1105-1108.
- 621 62. Roeder T, Isermann K, Kabesch M: **Drosophila in asthma research.** *Am J Respir Crit Care Med*  
622 2009, **179**(11):979-983.
- 623 63. Roeder T, Isermann K, Kallsen K, Uliczka K, Wagner C: **A Drosophila asthma model - what the fly**  
624 **tells us about inflammatory diseases of the lung.** *Adv Exp Med Biol* 2012, **710**:37-47.
- 625 64. Brand AH, Perrimon N: **Targeted gene expression as a means of altering cell fates and generating**  
626 **dominant phenotypes.** *Development* 1993, **118**(2):401-415.
- 627 65. Harrison DA, Binari R, Nahreini TS, Gilman M, Perrimon N: **Activation of a Drosophila Janus**  
628 **kinase (JAK) causes hematopoietic neoplasia and developmental defects.** *EMBO J* 1995,  
629 **14**(12):2857-2865.
- 630 66. Fink C, Hoffmann J, Knop M, Li Y, Isermann K, Roeder T: **Intestinal FoxO signaling is required to**  
631 **survive oral infection in Drosophila.** *Mucosal Immunol* 2016, **9**(4):927-936.
- 632 67. Bosch JA, Tran NH, Hariharan IK: **CoinFLP: a system for efficient mosaic screening and for**  
633 **visualizing clonal boundaries in Drosophila.** *Development* 2015, **142**(3):597-606.
- 634 68. Chen F, Krasnow MA: **Progenitor outgrowth from the niche in Drosophila trachea is guided by**  
635 **FGF from decaying branches.** *Science* 2014, **343**(6167):186-189.
- 636 69. Campos-Ortega JA, Hartenstein V: **The Embryonic Development of Drosophila melanogaster:**  
637 Springer-Verlag Berlin Heidelberg; 1997.
- 638 70. Jeon M, Nguyen H, Bahri S, Zinn K: **Redundancy and compensation in axon guidance: genetic**  
639 **analysis of the Drosophila Ptp10D/Ptp4E receptor tyrosine phosphatase subfamily.** *Neural Dev*  
640 2008, **3**:3.
- 641 71. Levi BP, Ghabrial AS, Krasnow MA: **Drosophila talin and integrin genes are required for**  
642 **maintenance of tracheal terminal branches and luminal organization.** *Development* 2006,  
643 **133**(12):2383-2393.
- 644 72. Martin M: **Cutadapt Removes Adapter Sequences From High-Throughput Sequencing Reads.**  
645 *EMBnetjournal* 2011, **17**:10-12.
- 646 73. Hoskins RA, Carlson JW, Wan KH, Park S, Mendez I, Galle SE, Booth BW, Pfeiffer BD, George RA,  
647 Svirskas R *et al*: **The Release 6 reference sequence of the Drosophila melanogaster genome.**  
648 *Genome Res* 2015, **25**(3):445-458.

649

650 Table 1 Genes that were most strongly upregulated in response to Hop.CA  
651 overexpression.

| Name            | Maximum group mean | Fold change | FDR p-value |
|-----------------|--------------------|-------------|-------------|
| CG16772         | 11.85472435        | 135.4356918 | 0           |
| hop             | 286.0640796        | 35.42957686 | 0           |
| CG14570         | 42.20996514        | 35.3698493  | 0           |
| CG14147         | 55.30940549        | 32.87679686 | 0           |
| Hsp70Bb         | 161.511126         | 29.98530152 | 0           |
| Ubx             | 200.4588187        | 23.51089416 | 0           |
| pre-mod(mdg4)-l | 1.124681971        | 18.66759173 | 2.22648E-06 |
| IM14            | 11.45782606        | 15.13546529 | 3.80132E-07 |
| IM4             | 26.42664387        | 14.97315552 | 1.74645E-12 |
| CG14569         | 1576.880077        | 14.72575164 | 0           |
| IM2             | 7.261319979        | 14.4714161  | 2.01792E-06 |
| CG5791          | 1.786460103        | 13.80267454 | 2.90502E-05 |
| CG9121          | 3.412245019        | 11.53962271 | 0           |
| IM1             | 7.159415315        | 10.97306621 | 7.52122E-05 |
| CG11413         | 35.69960698        | 10.63636792 | 3.44242E-07 |
| CG16710         | 2.132413445        | 10.32026533 | 1.72352E-07 |
| CG31960         | 267.2645814        | 10.04792875 | 0           |
| CG16789         | 1.452007625        | 9.460811492 | 5.58576E-09 |
| CG6034          | 6.915088882        | 8.468387575 | 4.7943E-11  |
| Ace             | 2.056513226        | 8.187696842 | 0           |
| CG13059         | 9.898481009        | 7.578675956 | 1.33893E-06 |
| CG31809         | 8.642528741        | 7.388263435 | 0           |
| CG7203          | 9.406607055        | 7.213889526 | 8.66989E-09 |
| Vha14-2         | 2.510881225        | 7.050881817 | 2.31024E-07 |
| wb              | 7.35456153         | 6.689915209 | 0           |
| Drs             | 8166.473129        | 6.635790672 | 0           |
| CG5778          | 3.202417196        | 6.607038471 | 0.000294835 |
| CG3457          | 2.693960701        | 6.337465056 | 2.38755E-06 |
| Lcp65Ad         | 9.932204556        | 5.792567795 | 2.58249E-08 |
| lectin-22C      | 29.06148461        | 5.674130819 | 6.88538E-06 |
| fuss            | 3.973734058        | 5.673577323 | 0           |

Niu et al.

JAK/STAT signaling in the larval trachea of *Drosophila*

|         |             |             |             |
|---------|-------------|-------------|-------------|
| CG43333 | 2.390923691 | 5.632143859 | 1.48392E-09 |
| CG18336 | 2.963052606 | 5.485479621 | 5.52167E-05 |
| CG32563 | 3.062298877 | 5.352654098 | 0.000696584 |
| FASN2   | 1.651227873 | 5.340581227 | 2.95545E-10 |
| Cyp4d21 | 45.69613978 | 5.308508635 | 0           |
| Obp57d  | 1.797549513 | 5.276761495 | 0.000102926 |
| CG17560 | 2.313559171 | 5.218521032 | 0.000766701 |
| CG5888  | 68.16302548 | 5.201444372 | 0           |

652  $p < 1 \times 10^{-4}$ , fold change > 5, maximum group mean > 1. The list is restricted to 39 genes.

653

654 Table 2 Transcription factor-binding site motifs enriched in 41 highly upregulated genes.

| Matrix ID | Matrix name | P-value     |
|-----------|-------------|-------------|
| MA0023.1  | dI (var.2)  | 0.000443261 |
| MA0022.1  | dI          | 0.00407113  |
| MA0532.1  | Stat92E     | 0.00794732  |
| MA0450.1  | hkb         | 0.00811969  |
| MA0197.2  | nub         | 0.0154201   |
| MA0242.1  | Bgb::run    | 0.0371696   |
| MA0204.1  | Six4        | 0.0443521   |
| MA0444.1  | CG34031     | 0.0488169   |

655 A total of 133 transcription factor profiles were used.

656



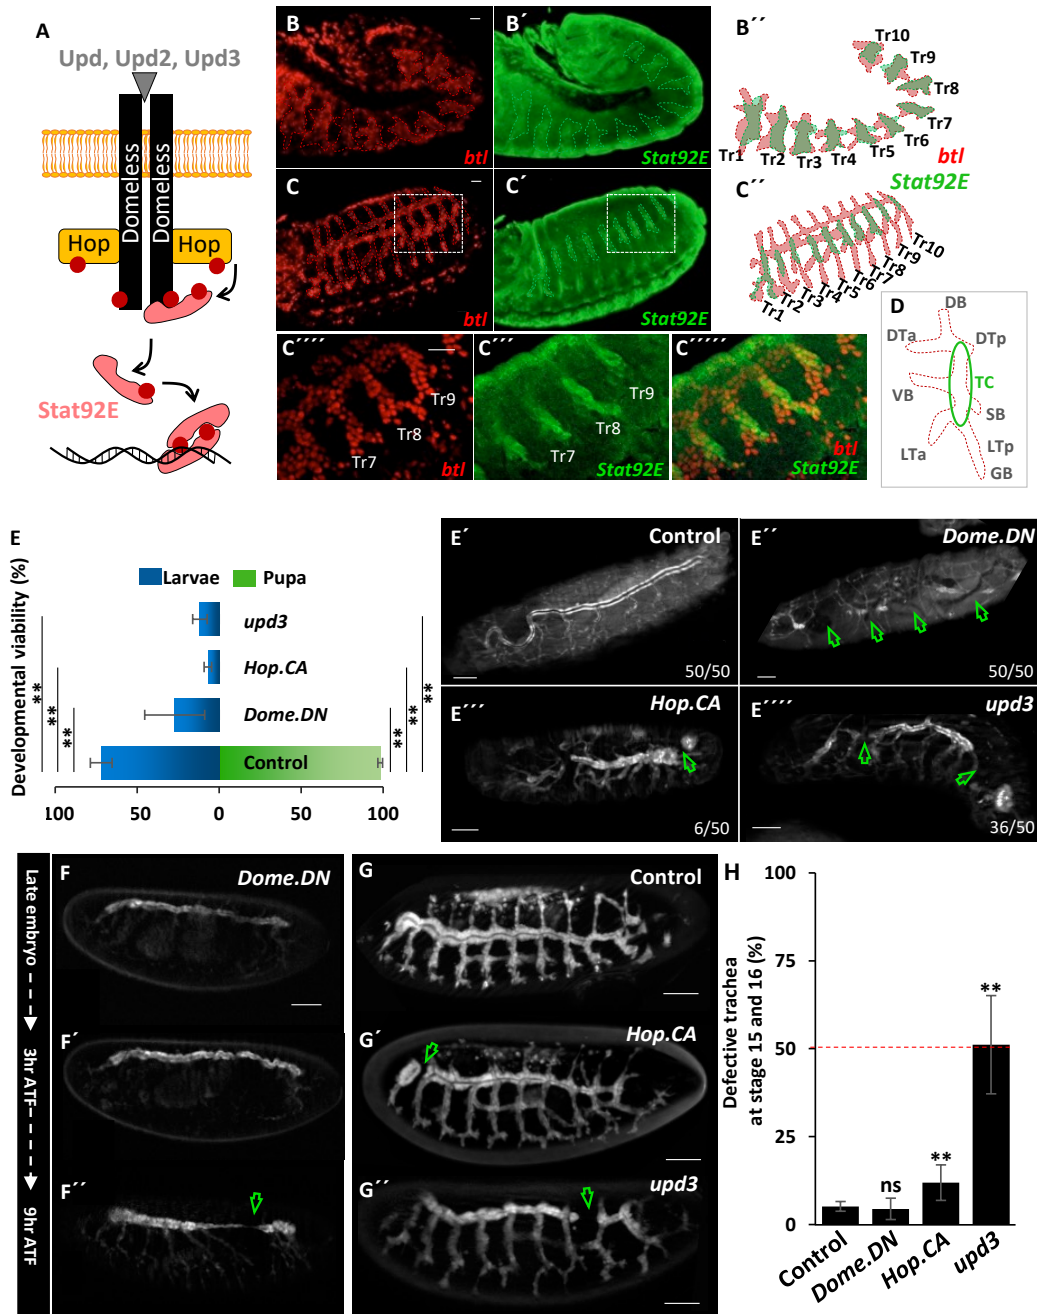

657

658 Figure 1: Effects of JAK/STAT signaling in the airway development in *Drosophila* embryos. (A) shows a  
 659 model of JAK/STAT signaling pathway in *Drosophila* comprising all major components. Three ligands  
 660 (Upd, Upd2 and Upd3) bind to a single receptor, Domeless (Dome), which transmits this information  
 661 via a single JAK (Hopscotch (Hop)) to a single STAT transcription factor (Stat92E). (B-D) Fluorescence  
 662 micrographs of *btl-Gal4; Stat92E-GFP; UAS-LacZ.nls* embryos stained for GFP (green, JAK/STAT pathway  
 663 activated zones), Beta-galactosidase (red, tracheal metamere), respectively. The JAK/STAT signaling  
 664 pathway is activated in the whole trachea metamere (Tr). The activation of JAK/STAT pathway in the



665 terminal regions is weaker than that in the central regions before (B) and after the fuse of tracheal  
666 invaginations of all segments (C). (D) shows the pattern of activation of JAK/STAT signaling in the  
667 trachea metamere of embryos. DB, dorsal branch; DTa, dorsal trunk anterior; DTp, dorsal trunk  
668 posterior; VB, visceral branch; LTa, lateral trunk anterior; LTp, lateral trunk posterior; and GB, ganglionic  
669 branch; SB, spiracular branch; transverse connective, TC. The stronger signal in the central regions  
670 mainly belongs to TC. Scale bar: 20  $\mu\text{m}$ . (E) Ectopic blocking or activation of JAK/STAT signaling in the  
671 trachea was done by expressing of *Dome.DN* or *Hop.CA* (or *upd3*), respectively under the control of  
672 *btl-Gal4*. The percentage of embryos that hatched and the percentage of larva that developed into  
673 pupa is shown at the left side. Right (E'-E'''''): Micrographs surviving larvae. *Btl* driving the expression  
674 of *upd3* and *Dome.DN* inhibited the formation of an intact tracheal tree. *Btl* driving the expression of  
675 *Hop.CA* in the trachea showed more intact trachea trees compared to expressing *upd3* and *Dome.DN*  
676 in the trachea. X/XX: broken trachea/intact trachea; 50 animals were observed in each group. (F) Time-  
677 lapse imaging the trachea of *btl>Dome.DN* embryo continuously for 9 hours after the trachea formed  
678 (9hr ATF). 40 specimens were investigated. (G-H) Activation of the JAK/STAT pathway in the trachea led  
679 to incompleting tracheal development during tracheal morphogenesis. Fluorescence micrographs of  
680 *btl>Hop.CA* (or *>upd3*) embryos (G), and numbers of the trachea which had no fused Tr. (H)  
681 Quantification of the numbers of defect tracheal branches in response to the different treatments.  
682 Each group contains 3 replicates and each replicate contains 30 embryos in G and H. Arrows mark the  
683 broken sites in the trachea. ns means not significant, \*  $p < 0.05$ , \*\*  $p < 0.01$  by Student's t-test. Scale  
684 bar: 20  $\mu\text{m}$  in B-D; 50  $\mu\text{m}$  in E-G.

685  
686

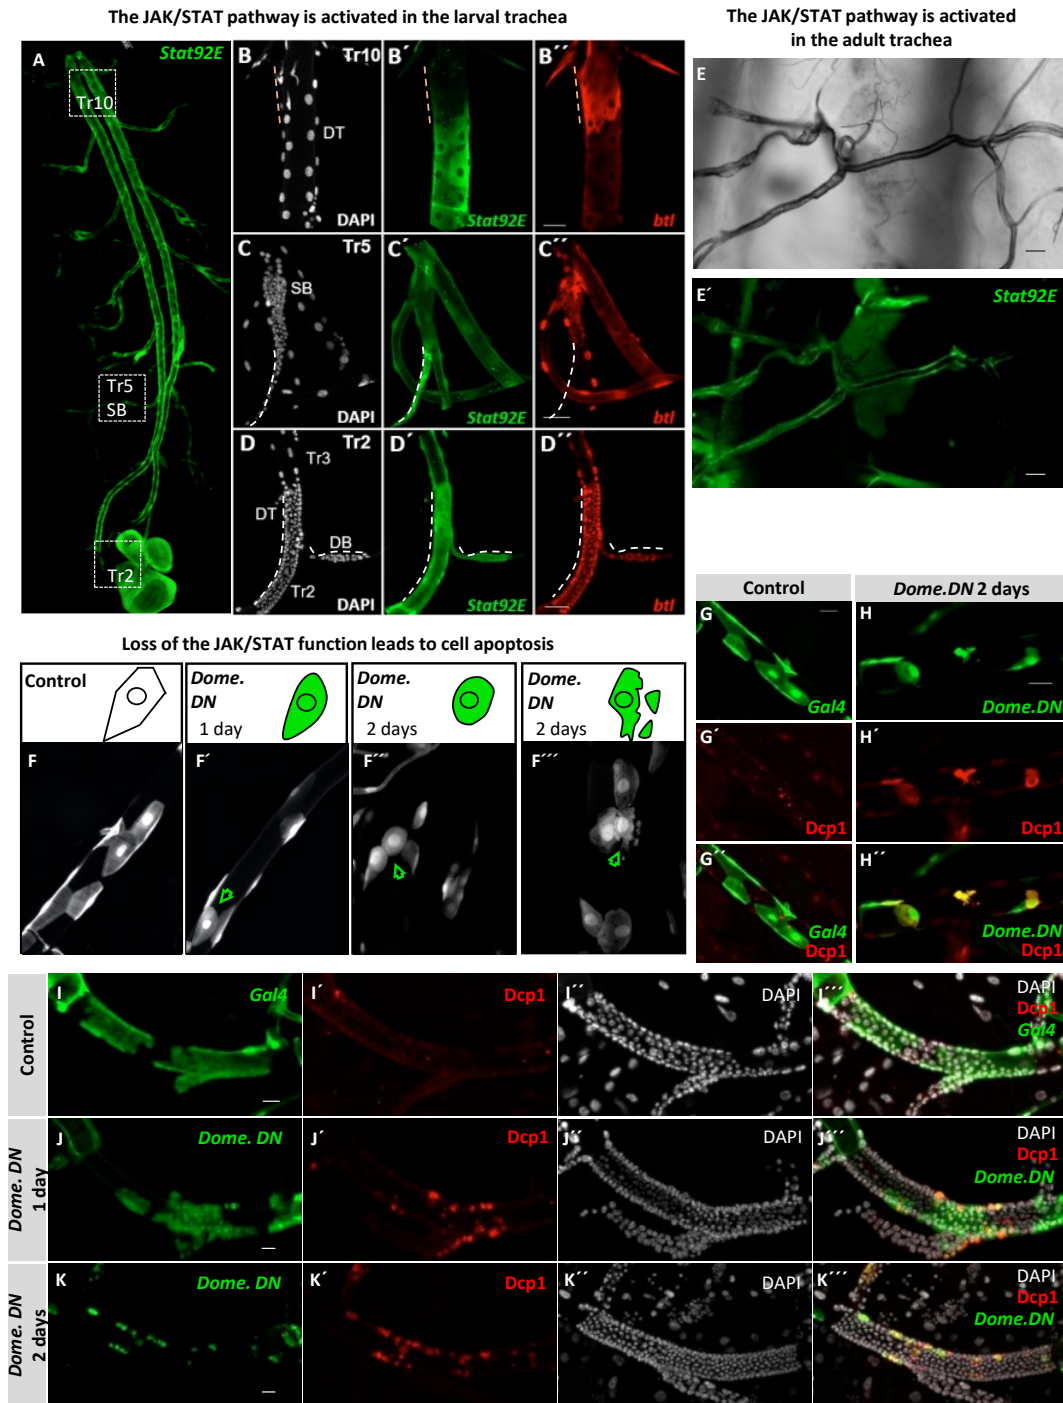

687

688 Figure 2: Inhibition of JAK/STAT signaling pathway induced cell apoptosis. (A-D) Fluorescence  
 689 micrographs of *btl-Gal4; Stat92E-GFP; UAS-LacZ.nls* larvae. The activation of JAK/STAT signaling was  
 690 detected by using the *Stat92E-GFP* reporter. In general, JAK/STAT signaling was induced in the whole  
 691 trachea of the larvae. The region in the posterior region of the trachea (orange dash line in B) that is  
 692 going to degenerate will lose JAK/STAT signaling. Conversely, some regions like Tr2, DB (C), and SB

693 where the cell re-enter into cell cycle (white dash line) exhibited stronger JAK/STAT signaling compared  
694 to the cell quiescent areas close to them. (E) Fluorescence micrographs of *btl-Gal4; Stat92E-GFP; UAS-*  
695 *LacZ.nls* adult. JAK/STAT signaling was induced in the trachea of the adult. (F) Fluorescence micrographs  
696 of the mutant clones in the trachea of *vvl-FLP, CoinFLP-Gal4, UAS-EGFP; tub-Gal80[ts] (vvl-*  
697 *coin.ts)>UAS-Dome.DN* larvae. Negative regulation of JAK/STAT pathway by expressing *Dome.DN* in the  
698 trachea led to the loss of cell shape and disintegration afterward (green arrows). (G-K) Fluorescence  
699 micrographs of the trachea of *vvl-coin.ts* larvae (G), and the trachea of *vvl-coin.ts>UAS-Dome.DN* larvae  
700 (H) stained for cleaved Dcp1 (red). Modified stem cells (J and K) could be stained by cleaved Dcp1  
701 earlier than the mutant somatic cells. Inhibition of JAK/STAT signaling induced blockade of cell division  
702 (I and K). 50 specimens were used in each assay.

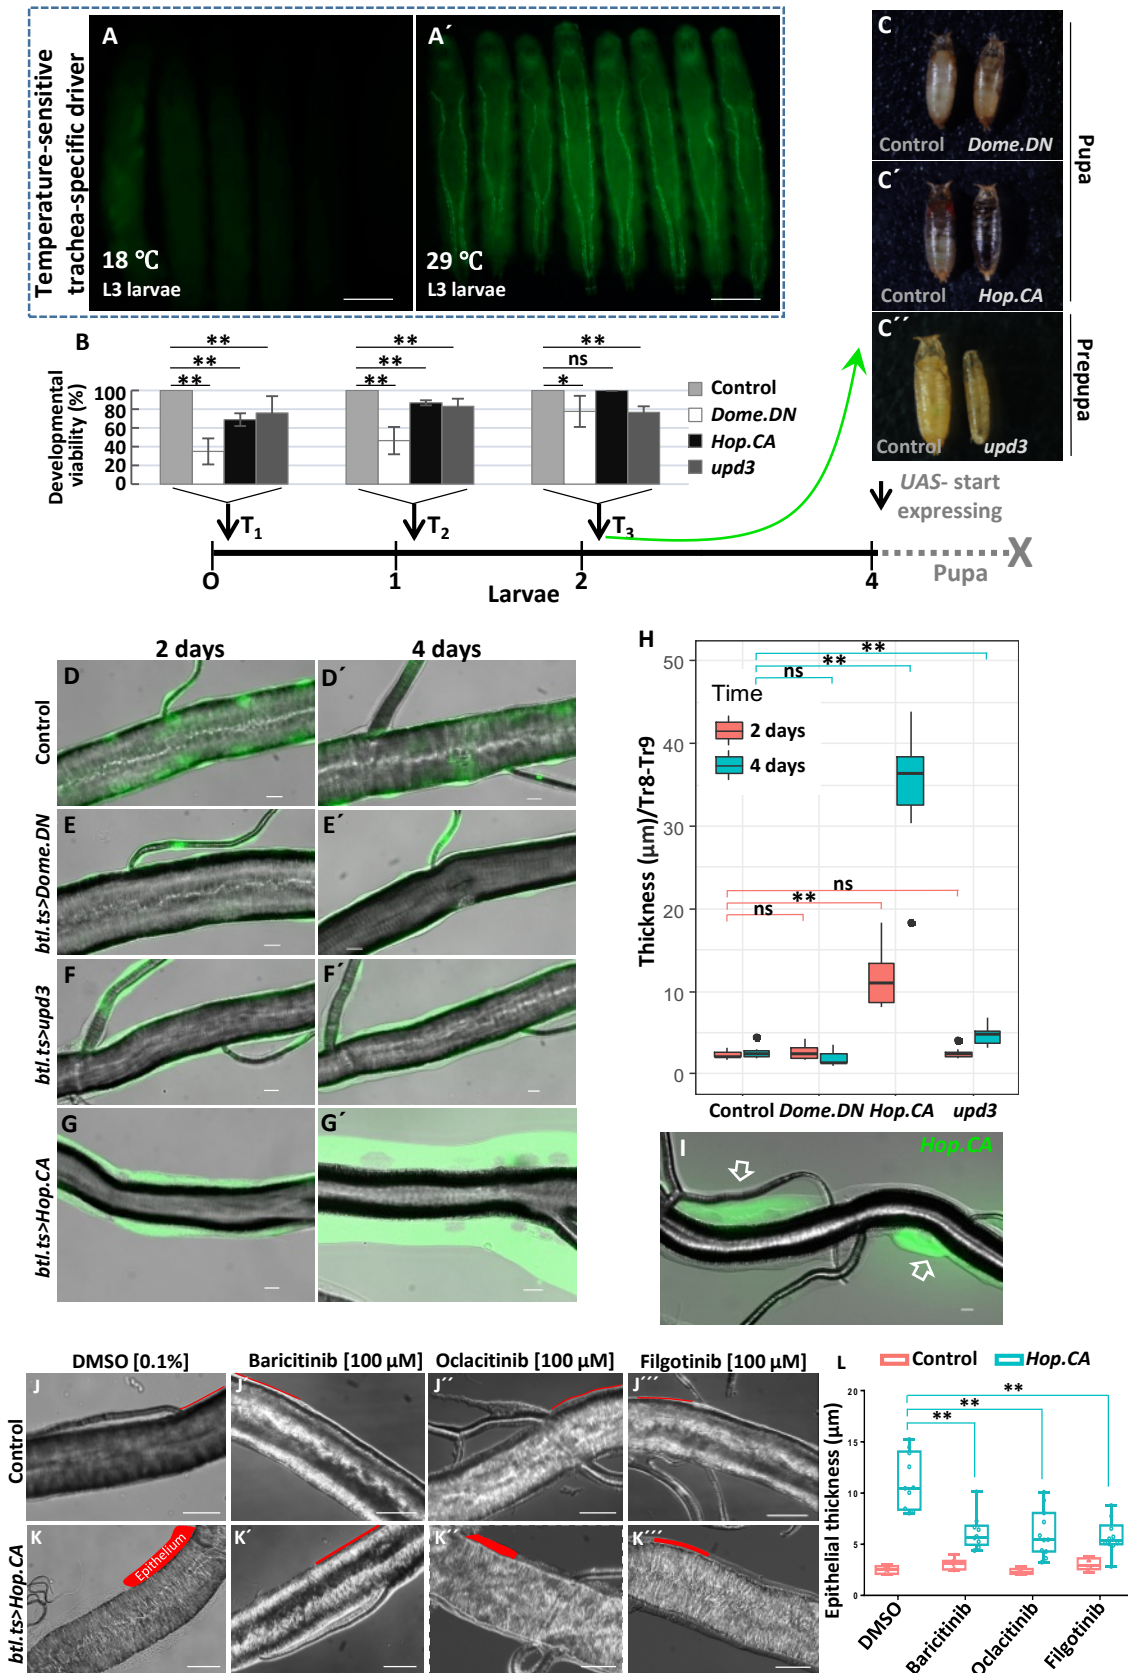

704 Figure 3: Ectopic activation of epithelial JAK/STAT signaling induces cell thickening. (A) *btl-Gal4, UAS-*  
705 *GFP; tub-Gal80[ts] (btl.ts)* larvae were reared at 18 °C (nonpermissive, A) and 29 °C (permissive, A'),  
706 respectively. Using the Gal4/UAS system, comprising the temperature-sensitive repressor Gal80[ts],  
707 were used to time ectopic gene expression. (B) Developmental viability of larvae with different  
708 genotypes (including *Dome.DN*, *Hop.CA*, and *upd3* expression in the trachea driven by *btl.ts*) and  
709 different start points of expression (indicated by black arrows). Statistical analysis of survival times is  
710 included. In this experiment, 4 replicates were performed with 30 larvae in B. (C) In general, none of  
711 these manipulations allowed survival up to adults. (D-G) Micrographs of Tr8-Tr9 of *btl.ts* L3 larvae (D,  
712 Control); *btl.ts>Dome.DN* L3 larvae (E); *btl.ts>Hop.CA* L3 larvae (F) and *btl.ts>upd3* L3 larvae (G) that  
713 were raised at 29 °C for 2 and 4 days, respectively. (H) Statistical analysis of the epithelial thicknesses  
714 in Tr8-Tr9 of the corresponding larvae. The thickness of 30 trachea per group were measured in H. (I)  
715 Micrographs of Tr8 of *vvl-FLP, CoinFLP-Gal4, UAS-EGFP (vvl-coin)>UAS-Hop.CA* larvae. The thickening  
716 of the tracheal epithelium is observed in those cells that express *Hop.CA*. Changes in epithelial  
717 thickness could be rescued by application of specific JAK inhibitors (J-L). (J-K) Microscopy of the tracheal  
718 epithelium (L3 larvae). Control crossings *btl.ts>w<sup>1118</sup>* (J) compared to JAK/STAT activated crossings  
719 *btl.ts>UAS-Hop.CA* (K). (L) Illustration and quantification of epithelial thickness (highlighted in red) of  
720 the JAK inhibitors (Baricitinib, Oclacitinib, Filgotinib) compared to DMSO control. The thickness of 10  
721 trachea per group were measured in J,K. ns means no significant, \*  $p < 0.05$ , \*\*  $p < 0.01$  by Student's  
722 t-test. Scale bar: 500  $\mu\text{m}$  in A; 20  $\mu\text{m}$  in D-G; 50  $\mu\text{m}$  J-K.

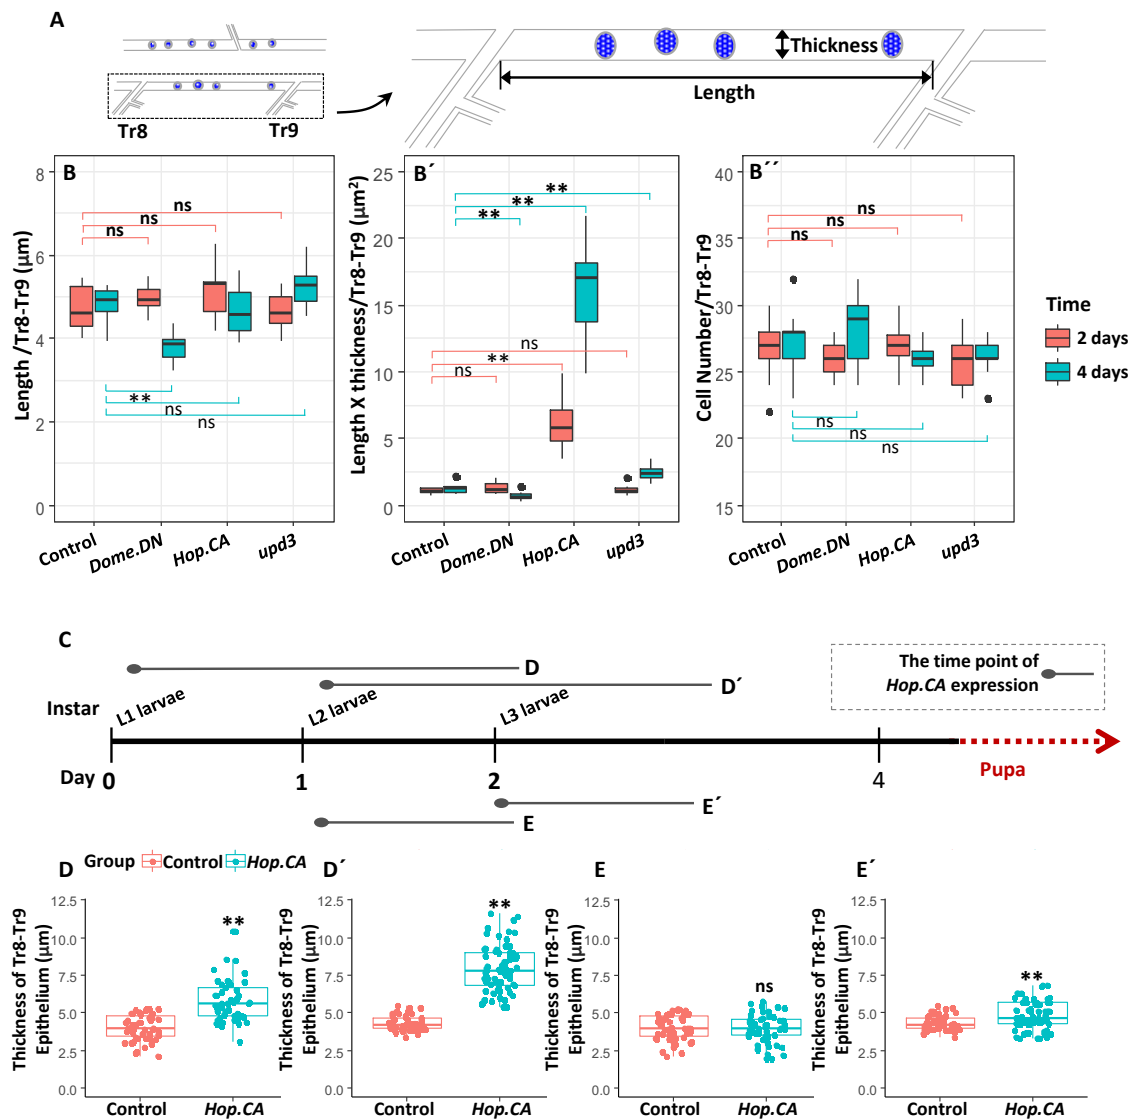

723

724 Figure 4: Changes in epithelial thickness could be attributed to the increase in cell volume and is time-  
 725 dependent. (A-B) Illustration and quantification of the length, length X thickness, and the cell number  
 726 of the Tr8-Tr9 region of larvae with different types of ectopic manipulation (including *Dome.DN*,  
 727 *Hop.CA* and *upd3* expression in the trachea driven by *btl.ts*) for 2 or 4 days, respectively. 30 trachea  
 728 were analysed in each group. (C-E) Illustration of the time point and period of activation of *Hop.CA*  
 729 expression by using the *btl.ts* (C) and quantification of the thickness of the Tr8-Tr9 region of control  
 730 larvae (*btl.ts* line) and those experiencing ectopic manipulation (*btl.ts>Hop.CA* line). Quantitative  
 731 analyses of the thicknesses (D). 1-day expression of *Hop.CA* starting at L2 larvae (E), but that started at  
 732 the early L3 stage promotes epithelial thickening (E'). Each group contains 50 replicates in D-E. ns  
 733 means not significant, \*  $p < 0.05$ , \*\*  $p < 0.01$  by Student's t-test.



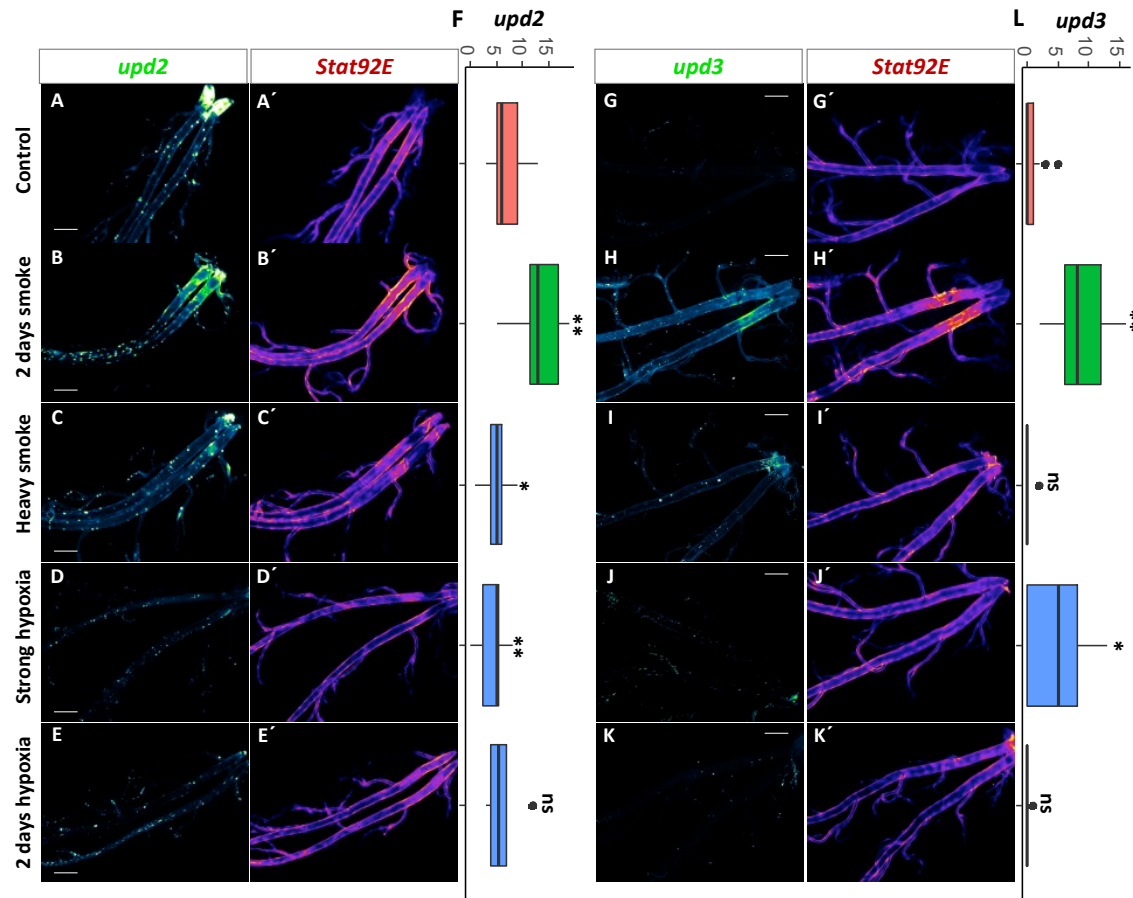

734

735 Figure 5: JAK/STAT signaling in airway epithelial cells is activated by long term cigarette smoke exposure.  
736 Fluorescence micrographs of the trachea of *upd2* (A-E) or *upd3* (G-K)-*Gal4*; *Stat92E*-*GFP*; *UAS-LacZ.nls*  
737 larvae that were exposed for 2 days smoke (B and H), heavy smoke (C and I), strong hypoxia (D and J),  
738 and 2 days of hypoxia (E and K). Trachea were stained for GFP (red, JAK/STAT pathway activated zones),  
739 Beta-galactosidase (green, cells that expressed *upd2* and *upd3*), respectively. (F and L) The numbers  
740 of cells that expressed *upd2* and *upd3* were counted under these different conditions. 40 trachea in  
741 each group were assayed. ns means not significant, \*  $p < 0.05$ , \*\*  $p < 0.01$  by Student's t-test. Scale bar:  
742 200  $\mu\text{m}$ .

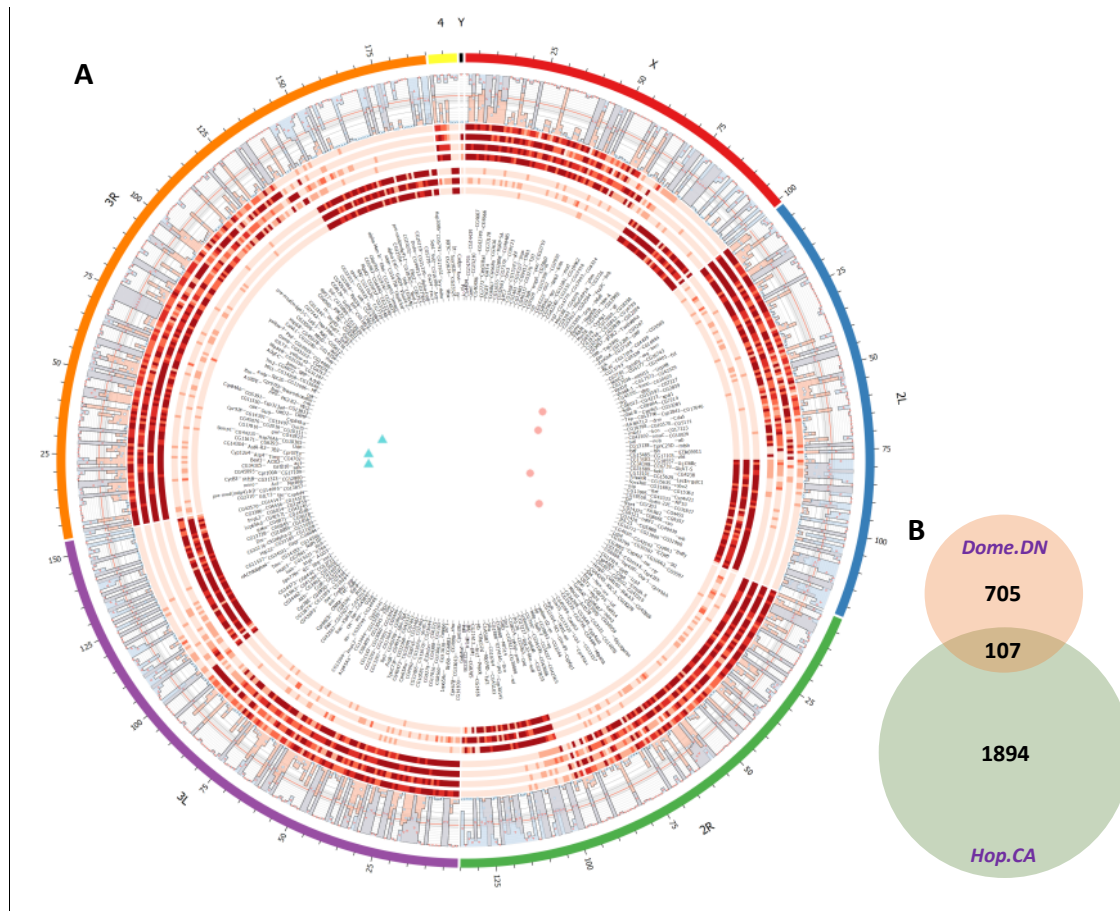

743

744

745 Figure 6: Changes at the transcript level in the airway epithelium of JAK/STAT mutants. Altered gene  
746 expression levels in the trachea caused by 16 hours persistent expression of *Hop.CA* driven by *btl.ts*. In  
747 total, 2004 genes were regulated significantly ( $p < 0.05$ ), in which 707 genes of (fold change  $> 2$ ,  $p <$   
748  $0.01$ ) showing even higher levels of significance. (A) These 707 genes were used to visualize the  
749 differences of the transcript levels between *Hop.CA* expressed trachea and control trachea. From the  
750 outside to the inside, a histogram for expression mean values (red, control; blue, *Hop.CA* group), a  
751 heatmap for controls, a heatmap for *Hop.CA* overexpression, gene names, and PCA analysis, are shown.  
752 According to transcriptome analysis of the tracheal epithelium 1128 genes ( $p < 0.05$ ) were down-  
753 regulated, 876 genes ( $p < 0.05$ ) were up-regulated. The changes in the gene expression total value were  
754 not significant in the ectopic expression trachea compared to the controls. (B) The inhibition of the  
755 JAK/STAT signaling by ectopic expressing *Dome.DN* for 18 hours affects the transcription of 814 genes,  
756 however, which only 102 genes were regulated in both types of airways; with ectopically activated and  
757 inhibited JAK/STAT signaling.



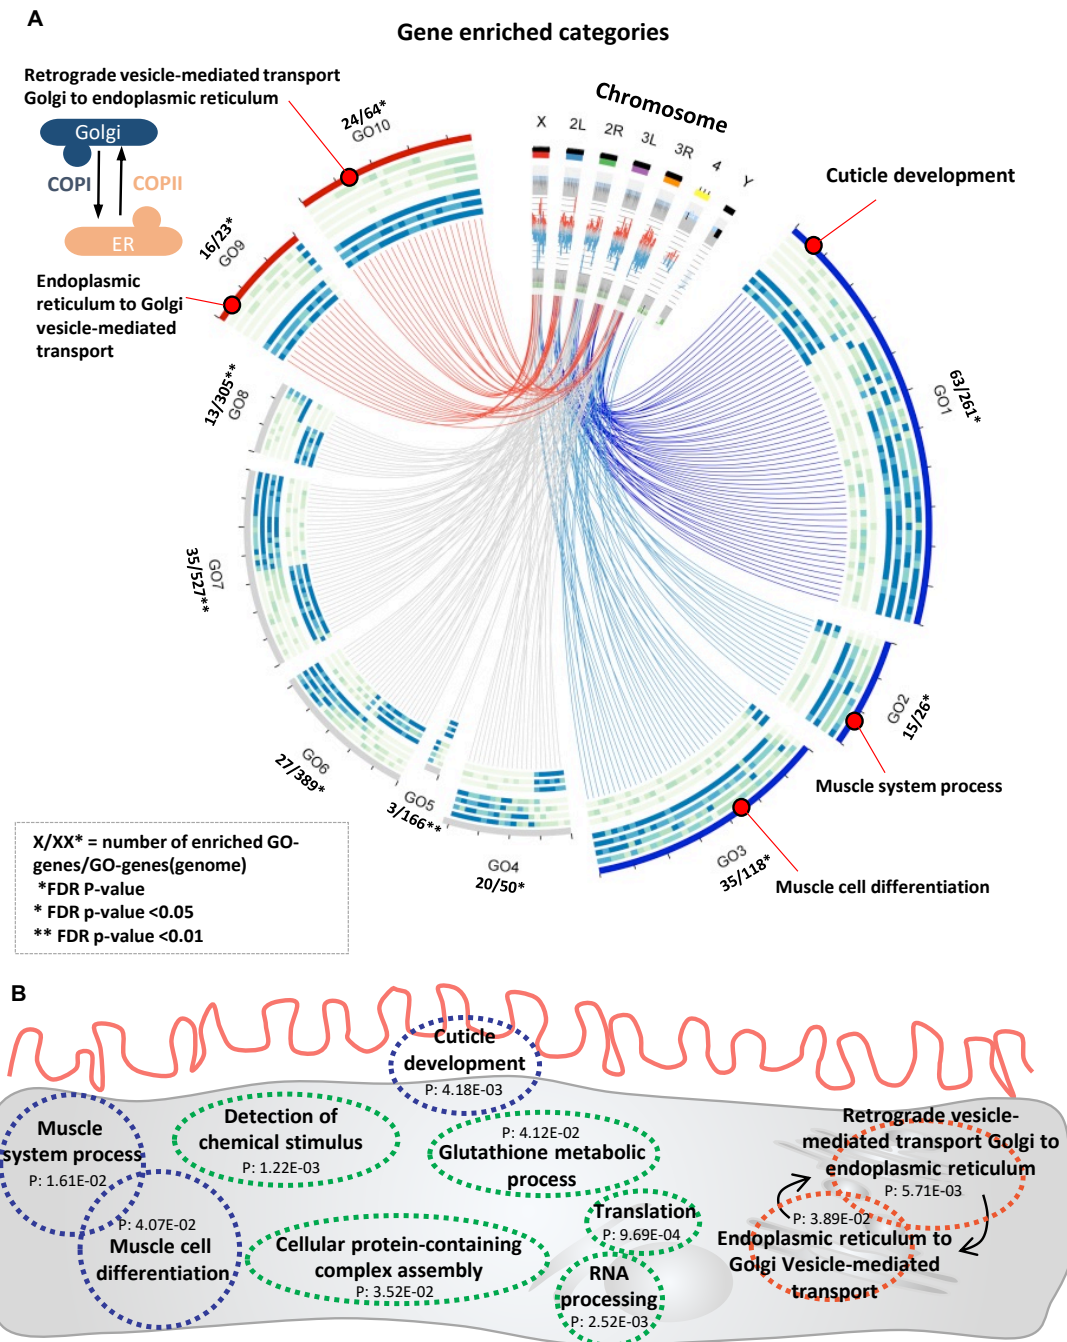

758

759 Figure 7: Gene Ontology (GO) enrichment analysis of the 2004 annotated differentially expressed genes  
760 in *Hop.CA* overexpressing airways vs controls. (A) Gene ontology analysis showed 10 biological  
761 processes that were enriched in *Hop.CA* overexpressing airways compared with matching controls.  
762 Most regulated genes in the GO1, GO2, and GO3 groups were down-regulated. Most regulated genes  
763 that involved in the COPI-and COPII-mediated vasicular transport between endoplasmic reticulum and  
764 Golgi (GO9 and GO10) were up-regulated. GO1, cuticle development; GO2, muscle system process;  
765 GO3, muscle cell differentiation; GO4, glutathione metabolic process; GO5, detection of chemical

766 stimulus; GO6, cellular protein-containing complex assembly; GO7, RNA processing; GO8, translation;  
767 GO9, endoplasmic reticulum to Golgi vesicle-mediated transport; GO10, retrograde vesicle-mediated  
768 transport Golgi to the endoplasmic reticulum. (B) Enriched biological processes were superimposed on  
769 a sketch depicting a tracheal epithelial cell, with the corresponding  $p$ -value added. Blue indicates  
770 processes where genes were mainly down-regulated; red indicates processes where genes were mainly  
771 up-regulated; green indicates processes where genes were both down-regulated and up-regulated at  
772 similar extents. See also table S10 for annotation of genes involved in each process. All processes  
773 shown displayed  $p < 0.05$  (Fisher's exact test).

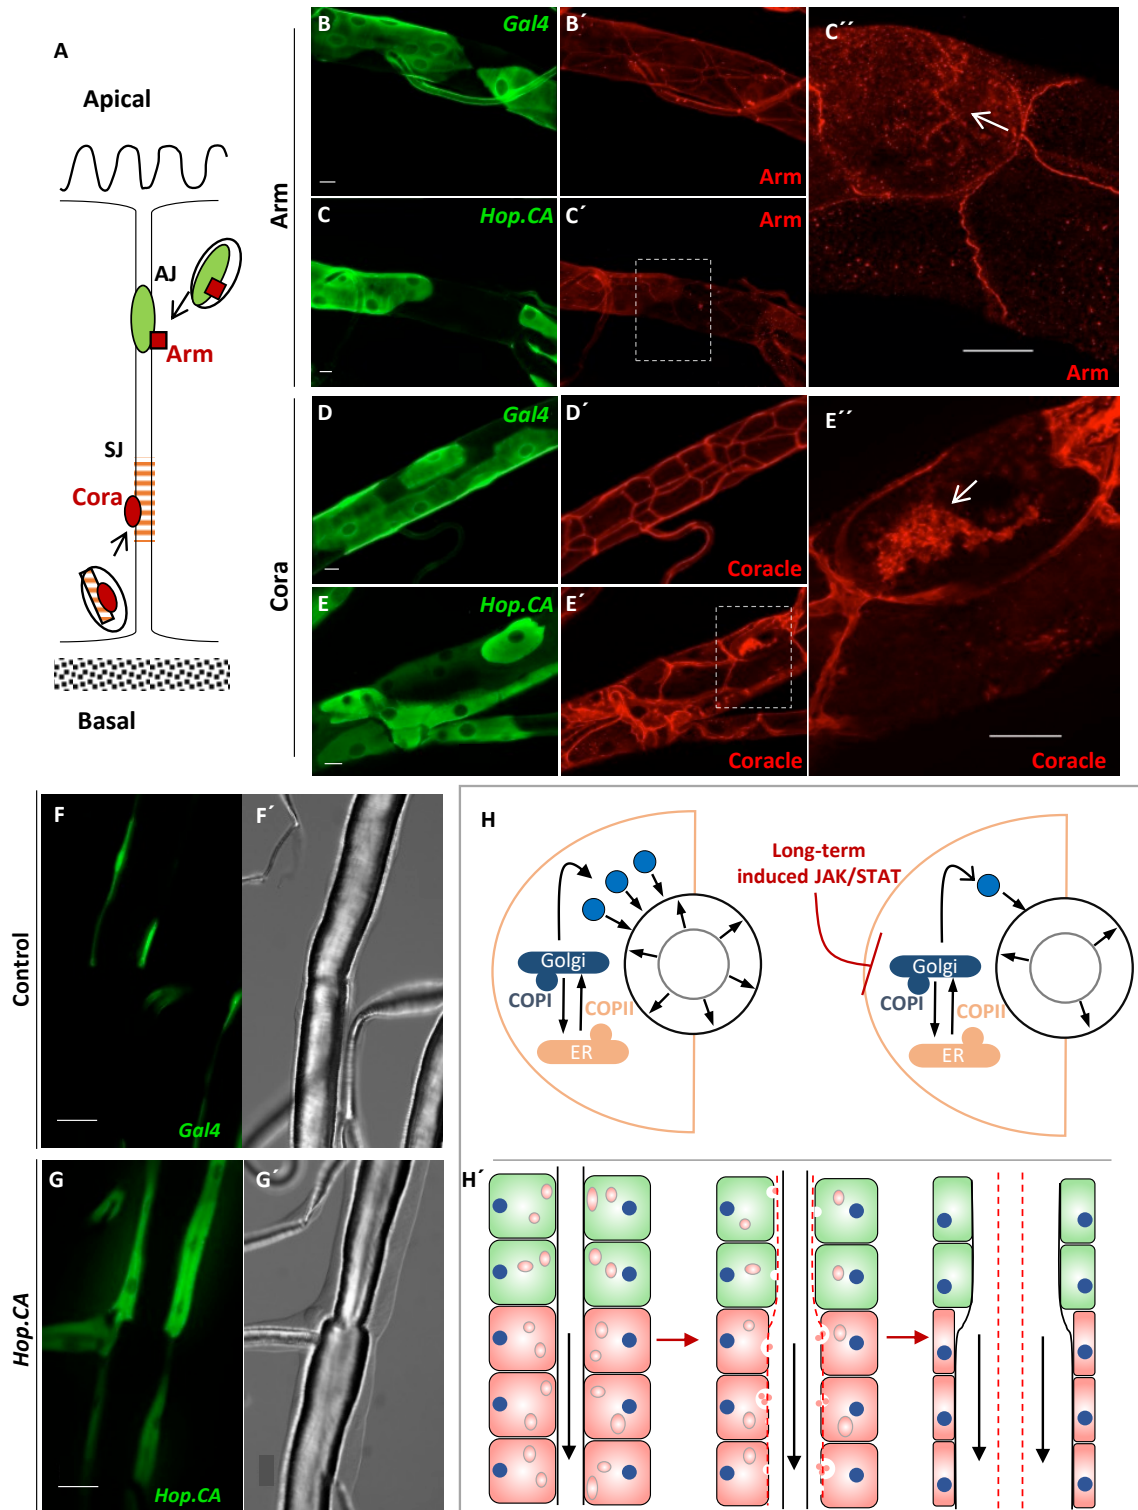

774

775 Figure 8: Activation of airway epithelial JAK/STAT signaling affects vesicle-mediated transport of  
 776 proteins. (A-E) Coracle (Cora) and Armadillo (Arm) localization in airway epithelial cells. (A) shows the  
 777 schematic orientation of Arm and Cora only at the contact zone between two airway epithelial cells.

778 Adherens junction (AJ), Septate junction (SJ). Trachea of *vvl-coin* larvae (control; B and D) and *vvl-*  
779 *coin>Hop.CA* larvae (treatment; C and E) stained for GFP (green, Gal4 positive cells), Arm or Cora (red),  
780 respectively. 30 specimens were investigated in each group. (F-G) Micrographs of the trachea of *vvl-*  
781 *coin* larvae (control; F) and *vvl-coin>Hop.CA* larvae (treatment; G). White are places where tracheal  
782 stenosis took place in the regions with cells expressing *Hop.CA* to a high degree. Scale bar: 20  $\mu$ m in A-  
783 E; 50  $\mu$ m in F-G. (H) Schematic illustration of the thickening of the epithelium and narrowing of the  
784 tube. In the control epithelium, a secretory burst of luminal proteins drives the diametric expansion of  
785 the tubes and this process depends on vesicle-mediated transport. COPI-and COPII-mediated vesicular  
786 transport plays a central role in this process, mutation members in the process underly the tube size  
787 defect in previous reports [27, 28]. However, long-term induced JAK/STAT activation impedes vesicle-  
788 mediated transport that can be reflected by the deregulation of massive genes involved in COPI-and  
789 COPII-mediated vesicular transport. This dysfunction of transport led to the appearance of tube size  
790 defect such as the increase in the cell volume and narrowing the tube size.

791



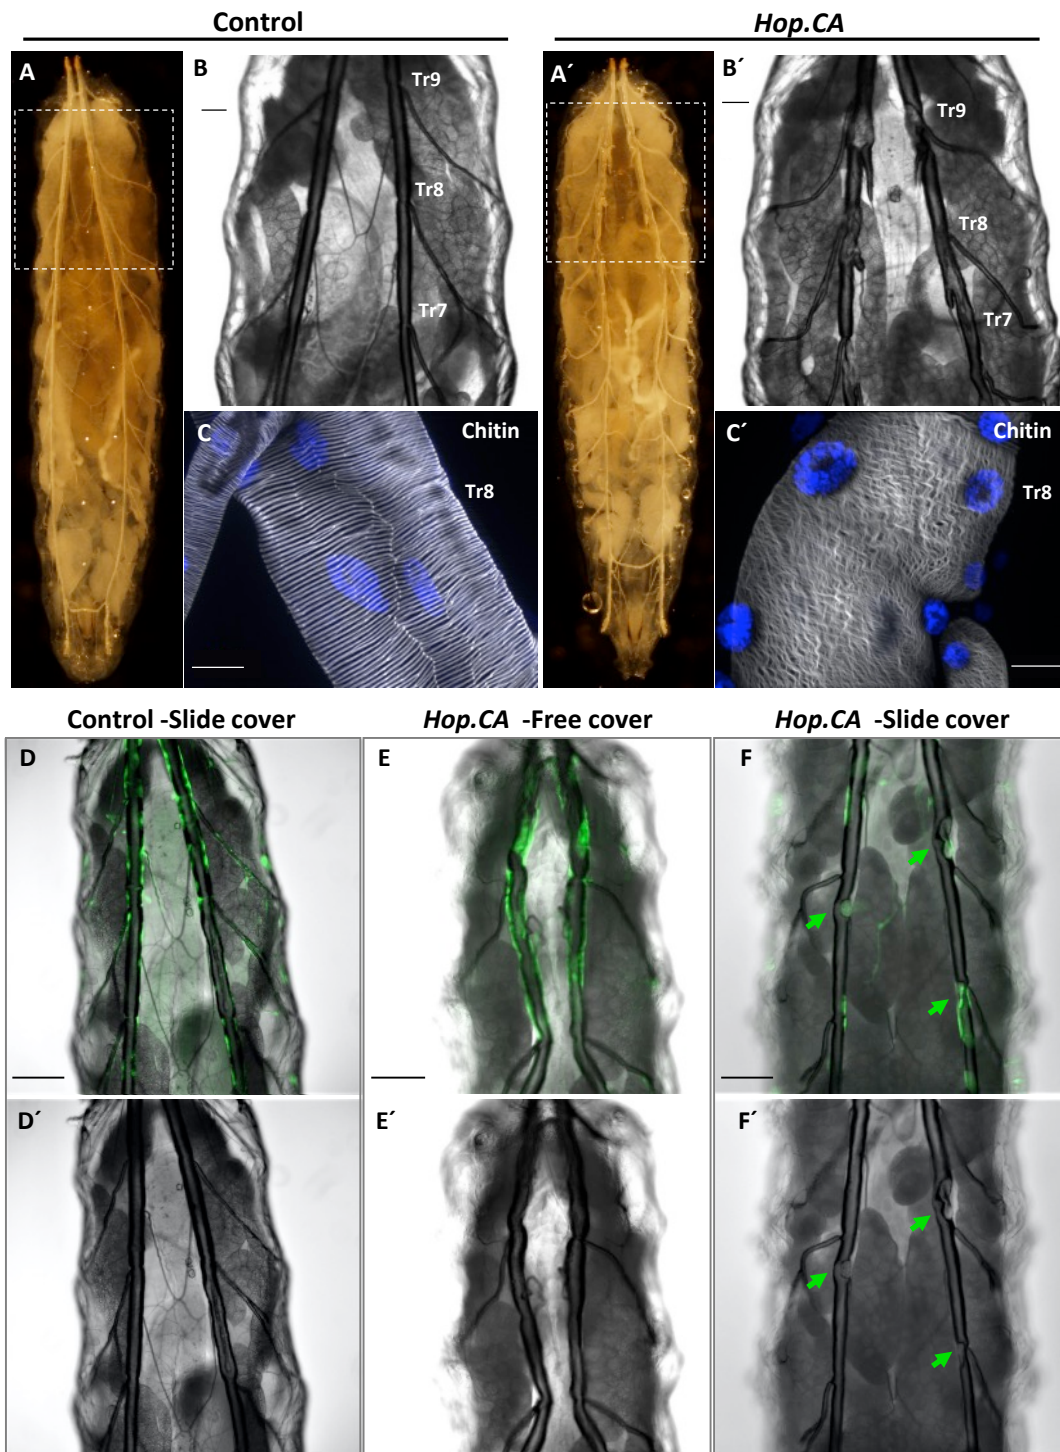

792

793 Figure 9: Activation of JAK/STAT signaling in airway epithelial cells affects the development of the  
794 epicuticle. (A-C) Activation of JAK/STAT signaling in airway epithelia observed in whole larvae by  
795 expressing *UAS-Hop.CA* under the control of the *btl.ts*. Controls (A-C) and induction of expression by  
796 shifting the temperature to 29 °C causes the defects in the tracheal epicuticle (A'-C'). 50 control larvae

797 and *btl.ts>Hop.CA* larvae were investigated in A-C. (A, A') Overview of the whole larvae showing the  
 798 whole tracheal system. In (B, B') the region containing Tr7-Tr9 is shown. (C, C') Chitin staining of isolated  
 799 airways (at the Tr8 region). (D-F) Micrographs of the trachea of *vvl-coin* larvae under different  
 800 conditions. In D, D' the control is shown, in E, E', the undisturbed larval of animals experiencing *Hop.CA*  
 801 overexpression are displayed. F, F' similar animals as in E, E', but the animals covered with a slide,  
 802 inducing a certain degree of compression. The arrows show the collapsed sites in the tracheal tube.  
 803 30 larvae in each group were investigated in D-F. Scale bar: 50  $\mu$ m in B; 20  $\mu$ m in C; 200  $\mu$ m in D-F.

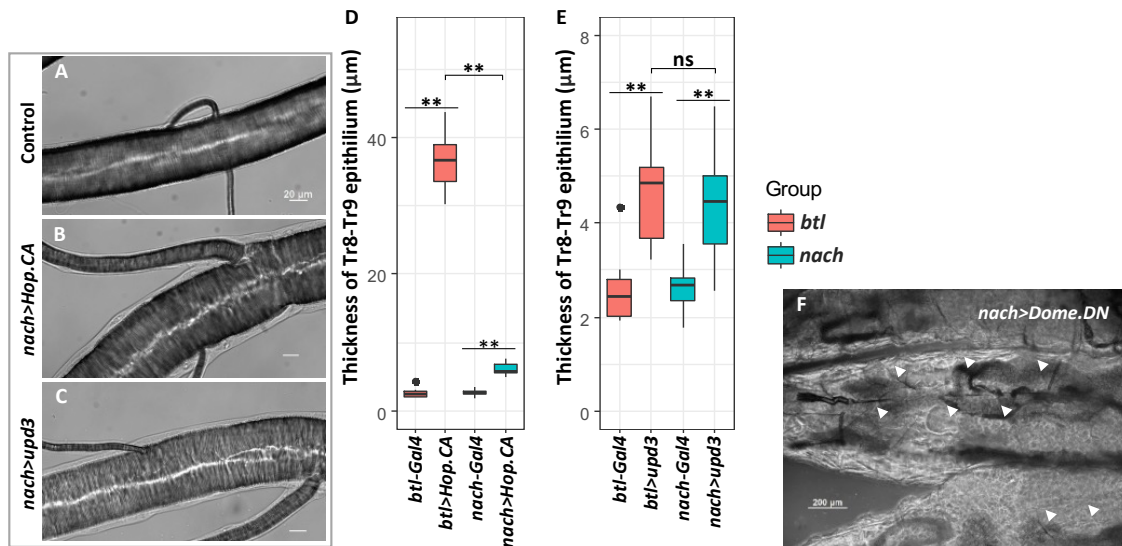

804

805 Figure 10: Mild activation of epithelial JAK/STAT signaling mitigated the thickening phenotype. (A-C)  
 806 Micrographs of the Tr8-Tr9 regions of *nach-Gal4* larvae (control, A), *nach>Hop.CA* (treatment, B), and  
 807 *nach>upd3* larvae (treatment, C). (D-E) Quantification of the epithelial thickness of the Tr8-Tr9 region  
 808 of those larvae whose JAK/STAT signaling were activated by expressing *Hop.CA* or *upd3* under the  
 809 control of *nach-Gal4* and *btl-Gal4*. (F) Micrographs of *nach>Dome.DN* larvae experiencing suppression  
 810 of the JAK/STAT pathway make trachea translucent and filled with fluids (arrows); triangle indicates the  
 811 tracheal position. 30 larvae in each group were used to quantify the thickness. ns means not significant,  
 812 \*  $p < 0.05$ , \*\*  $p < 0.01$  by Student's t-test. Scale bar: 20  $\mu$ m in A-C; 200  $\mu$ m in F.

813

814

815

816

817
