1 **Maintaining structural and functional homeostasis of the**  
2 ***Drosophila* respiratory epithelia requires stress-modulated**  
3 **JAK/STAT activity**

4  
5 Xiao Niu<sup>1, 2</sup>, Christine Fink<sup>1</sup>, Kimberley Kallsen<sup>3, 4</sup>, Leizhi Shi<sup>1, 5</sup>, Viktoria Mincheva<sup>1</sup>, Sören  
6 Franzenburg<sup>6</sup>, Ruben Prange<sup>1</sup>, Iris Bruchhaus<sup>7</sup>, Judith Bossen<sup>1, 8</sup>, Holger Heine<sup>2, 8</sup>, Thomas  
7 Roeder<sup>1, 8</sup>

8  
9 <sup>1</sup>Kiel University, Zoology, Dept. of Molecular Physiology, Kiel, Germany

10 <sup>2</sup>Current address: Weifang Medical University, College of Life Science and Technology,  
11 Weifang, China

12 <sup>3</sup>Research Center Borstel – Leibniz Lung Center, Div. of Innate Immunity, Borstel, Germany

13 <sup>4</sup>Current address: Boehringer Ingelheim, Ingelheim, Germany

14 <sup>5</sup>Department of Thoracic Surgery, Linyi People's Hospital, Linyi, Shandong, 276000, China

15 <sup>6</sup>Kiel University, IKMB, Kiel, Germany

16 <sup>7</sup>Bernhard Nocht Institute for Tropical Medicine, Hamburg, Germany

17 <sup>8</sup>German Center for Lung Research, Airway Research Center North, Kiel, Germany

18 **Highlights**

- 19 1. JAK/STAT signaling is active in the entire *Drosophila* respiratory system in all  
20 developmental stages.
- 21 2. The signaling pathway is indispensable for the survival of the tracheal cell.
- 22 3. Overactivation of the signaling has significant effects on tracheal development and also  
23 displays a human disease-associated phenotype in *Drosophila* trachea.

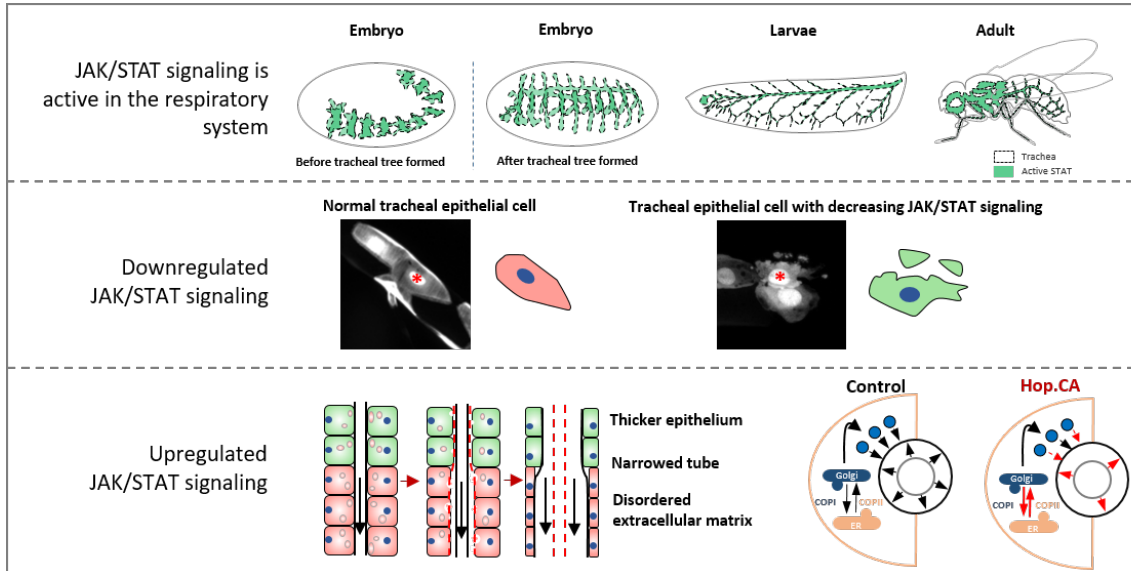

24

25

26

27

28 **Summary**

29 Signaling mediated by the Janus kinase (JAK)/Signal Transducer and Activator of  
30 Transcription (STAT) pathway is critical for maintaining cellular and functional homeostasis  
31 in the lung. Thus, chronically activated JAK/STAT signaling is causally associated with lung  
32 diseases such as lung cancer, asthma, and chronic obstructive pulmonary disease. To  
33 elucidate the molecular processes that transform increased JAK/STAT signaling in airway  
34 epithelial cells into the known pathological states, we used a highly simplified model  
35 system, the fruit fly *Drosophila melanogaster*. Here, the JAK/STAT pathway is permanently  
36 active in almost all airway cells and responds to airborne stressors with increased activity.  
37 Silencing of this signaling pathway in epithelial cells resulted in apoptosis. Since the above-  
38 mentioned lung diseases are commonly associated with increased JAK/STAT signaling, we  
39 assessed this by its ectopic activation in the respiratory epithelium of *Drosophila*. This  
40 intervention triggered cell-autonomous structural changes in epithelial cells. These  
41 structural changes included phenotypes associated with asthma, namely, thickening of  
42 the epithelium, substantial narrowing of the air-conducting space, and impairment of the  
43 secretory epicuticular structure of the tracheae. Pharmacological manipulation of  
44 JAK/STAT signaling reversed this pathological phenotype. Transcriptomic analyses  
45 revealed that several biological processes were affected, which is consistent with the  
46 impairment of junction protein trafficking also observed in this study. These results  
47 indicate that balanced JAK/STAT signaling is essential for the functionality of the

48 respiratory epithelium and, by extension, the entire organ. In contrast, chronic  
49 overactivation of this signaling leads to massive structural changes that are closely  
50 associated with pathologies typical of chronic inflammatory lung diseases.

## 51 **Introduction**

52 The Janus kinase (JAK)/signal transducer and activator of transcription (STAT) signaling  
53 system is of central importance for several critical physiological processes such as  
54 development, tissue homeostasis, and immune responses (Philips et al., 2022; Rawlings  
55 et al., 2004). Signal transduction via this pathway is straightforward and allows  
56 environmental factors to directly influence transcriptional activity, linking key biological  
57 processes to the environment (Kiu and Nicholson, 2012). Deregulation of this pathway is  
58 linked to numerous human diseases, with cancer and inflammatory pathologies being  
59 particularly prominent (Hu et al., 2021; Milara et al., 2018). JAK/STAT signaling acts  
60 downstream of a plethora of cytokines that transmit immune-related information, acting  
61 as a central integration hub in almost all cells of the lung (Yew-Booth et al., 2015)(Villarino  
62 et al., 2017). Signaling via this pathway is essential during organ development and for  
63 maintaining tissue and immune homeostasis of the fully differentiated lung. Here,  
64 JAK/STAT signaling is required to cope with stressors, infection, and damage (Jin et al.,  
65 2018; Kida et al., 2008; Major et al., 2020; Makris et al., 2017; Tadokoro et al., 2014). Given  
66 the importance of JAK/STAT signaling in the lung, it is predictable that decreased or  
67 increased signaling via this pathway leads to pathologies. Whereas reduced JAK/STAT  
68 signaling corresponds with impaired repair capacities (Tadokoro et al., 2014), increased  
69 JAK/STAT signaling is associated with a plethora of chronic lung diseases including asthma,  
70 chronic obstructive pulmonary disease (COPD), idiopathic pulmonary fibrosis (IPF), and

71 lung cancer (Dutta et al., 2014; Georas et al., 2021; Milara *et al.*, 2018; Yew-Booth *et al.*,  
72 2015). Despite its simple general organization, the JAK/STAT signaling pathway in  
73 vertebrates shows multiple redundancies, parallels, and convergences; a situation that is  
74 further complicated since these signaling pathways may act differently in different cell  
75 types of the same organ (Hu *et al.*, 2021; Morris et al., 2018; Villarino *et al.*, 2017).  
76 Therefore, models with a much simpler JAK/STAT signaling pathway and a less complex  
77 cellular composition in the airways should help to elucidate the effects of deregulated  
78 JAK/STAT signaling, especially in airway epithelial cells. *Drosophila melanogaster* can be  
79 used for this task, as only one receptor (Domeless), one JAK kinase (Hopscotch), and one  
80 STAT transcription factor (STAT92E) are present (Arbouzova and Zeidler, 2006; Zeidler and  
81 Bausek, 2013). This low level of redundancy offers the unique advantage to study the  
82 generic relevance of JAK/STAT signaling. Furthermore, the use of *Drosophila* allows  
83 focusing exclusively on the airway epithelium, a resident cell population playing a central  
84 role in the orchestration of organ homeostasis, but also for developing chronic pathologies.  
85 In the tracheal system of *Drosophila*, the lung's functional equivalent, there is so far only  
86 information on the relevance of JAK/STAT signaling during embryonic development and  
87 the formation of the adult tracheal system (Brown et al., 2001; Perrimon and Mahowald,  
88 1986; Powers and Srivastava, 2019). A lack of JAK/STAT signaling during very early phases  
89 of tracheal development impairs tracheal development including cell movement and  
90 elongation, as well as invagination processes that lead to tube formation (Brown et al.,

91 2001; Isaac and Andrew, 1996). During the development of the vertebrate lung, very  
92 similar processes are operative (Nogueira-Silva et al., 2006; Piairo et al., 2018). In recent  
93 years, *Drosophila* served as a model for numerous human diseases (Pandey and Nichols,  
94 2011) including those of the lung (Bossen et al., 2021; Levine and Cagan, 2016; Prange et  
95 al., 2018; Roeder et al., 2009; Roeder et al., 2012).

96 The current study aimed to elucidate the general importance of JAK/STAT signaling in the  
97 airways and understand how chronic deregulation of this pathway in airway epithelial cells  
98 results in pathological outcomes. Applying a tailored *Drosophila* model, we could not only  
99 show that JAK/STAT signaling is required to prevent apoptosis of airway epithelial cells but  
100 that a wide variety of stressors increased signaling via this pathway significantly. Ectopic  
101 activation on the other hand, leads to massive structural changes that drastically limit  
102 airway epithelial functionality. Using this model, we demonstrated that balanced JAK/STAT  
103 signaling in airway epithelia is imperative to prevent the development of pathology and  
104 that pharmacological intervention at precisely this point is excellent for addressing it.

105

## 106 **Results**

107 Activation of the JAK/STAT pathway occurs in a wide variety of organs and can easily and  
108 reliably be visualized in *Drosophila* using transcriptional reporters. Here, the activity of the  
109 pathway (Fig. 1A) is visualized by a STAT92E-promoter-dependent GFP-based reporter

110 approach (Bach et al., 2007). It was already known that the JAK/STAT pathway is strongly  
111 activated in the trachea during embryogenesis and it could be assumed to be important  
112 for tracheal development (Bach et al., 2007). However, the exact pattern of its activation  
113 is still unclear. To fill this gap of knowledge, we analyzed the *STAT92E*-reporter activity  
114 concurrently with *btl>LacZ.nls* (Shiga et al., 1996), which specifically labels the trachea.  
115 Activation of the *STAT92E-GFP* reporter was pronounced in a central region in the trachea,  
116 mainly in the transverse connective area (Fig. 1B–D). To evaluate if the JAK/STAT pathway  
117 also operates in a functional airway epithelium under control conditions, we used the  
118 *STAT92E-GFP* reporter line to monitor pathway activity in the larval tracheal system (Fig.  
119 1E). JAK/STAT activity was relatively low in the posterior zone of the trachea (Fig. 1F), the  
120 tenth tracheal metamere (Tr10), where cells progressively undergo apoptosis in response  
121 to trachea metamorphosis (Bosch et al., 2015; Chen and Krasnow, 2014). However,  
122 JAK/STAT activity was much stronger in regions such as Tr2, the spiracular branch (SB), and  
123 the dorsal branch (DB) than in nearby areas (Fig. 1G and H). In these areas with high  
124 JAK/STAT activity, cells re-enter the cell cycle at this developmental stage (Guha et al.,  
125 2008; Sato et al., 2008; Weaver and Krasnow, 2008). We next evaluated if JAK/STAT activity  
126 is observed in airway epithelial cells of adults. The same approach detected substantial  
127 reporter activity in airway epithelial cells of fully developed adults (Fig. 1I). The JAK/STAT  
128 pathway was active throughout the entire tracheal system. In addition, we evaluated the  
129 expression of the three *upds* in the larval trachea. Experiments using the corresponding



130 enhancer-*Gal4* lines demonstrated that especially *upd2* was highly expressed in the  
131 tracheal system (Fig. S1).

### 132 **The JAK/STAT pathway responds to stressful stimuli**

133 To investigate whether external, stress-associated stimuli can affect JAK/STAT signaling in  
134 airway epithelia, we exposed the just-described reporter lines to these stimuli. We  
135 focused on airborne stressors and exposed both larvae and adults to them. Here, the  
136 administration of cold air (cold), hypoxia, and cigarette smoke (CSE) boosted the activity  
137 of the JAK/STAT pathway in airway epithelial cells (Figure 2A and 2C) of both larval and  
138 adult animals. A quantitative evaluation of the induced fluorescent signals showed that  
139 these increases were statistically significant (Fig. 2C).

140 Then we expanded the analysis of the effects of airborne stressors to include the ligands  
141 of the signaling system. We found that one of the three ligands, *upd*, did not show any  
142 expression independent of the situation (data not shown). In contrast, the expression of  
143 *upd2* and *upd3* were induced by external stimuli, for *upd2* only by CSE, for *upd3* by CSE  
144 and hypoxia (Fig. S2). The activity of the *STAT92E-GFP* reporter was induced exactly in the  
145 region where also the ligand showed enhanced expression. For further analyses, we  
146 focused on the most responsive *upd* gene, namely *upd3*. Expression of *upd3* was low in  
147 the tracheal cells of larvae or adult animals that lived under control conditions but could  
148 easily be observed in all these tracheal cells when the animals were exposed to external  
149 stimuli (Fig. 2B and 2D).

150 **JAK/STAT signaling is essential for the survival of airway epithelial cells**

151 To evaluate the relevance of the JAK/STAT pathway in the *Drosophila* respiratory system,  
152 we blocked its activity in the trachea by driving the expression of a dominant-negative  
153 isoform of Domeless (*Dome.DN*) using the trachea-specific *btl-Gal4* driver. As a result,  
154 some animals developed to the larval stage (Fig. 3A), but all died before reaching the pupal  
155 stage. Microscopic analysis of surviving larvae showed that the dorsal trunk (DT) was  
156 absent (Fig. 3B'). Time-lapse imaging of embryos experiencing trachea-specific *Dome.DN*  
157 expression revealed that all tracheal segments were fused, however, the DT subsequently  
158 separated (Fig. 3C). STAT92E-RNAi was used to confirm this kind of effects on trachea. A  
159 detailed analysis of the effects caused by constitutive *Dome.DN* expression was performed  
160 using a mosaic approach (Wu et al., 2006). Here, driving expression in a mosaic fashion by  
161 *vvl-FLP, CoinFLP-Gal4* changed the morphology of the affected cells. These cells appear to  
162 undergo apoptosis (Fig. 3D). Apoptosis of these affected cells was confirmed by the  
163 detection of Dcp1 in exactly these cells, which is a hallmark of apoptosis (Fig. 3E-F).  
164 Apoptosis was induced to an even greater extent (and faster) in progenitor cells of the  
165 larval tracheal system, where Dcp1-positive cells were observed on day 1 after induction  
166 of *Dome.DN* expression (Fig. 3G-I).

167 **Increased JAK/STAT signaling induced cell-autonomous structural changes in epithelial**  
168 **cells**

169 We tested the effects of ectopic activation of the JAK/STAT pathway induced by expression  
170 of the ligand (*upd3*) or a constitutively active JAK-allele (*Hop.CA*) on tracheal development.  
171 These animals died prematurely at the embryo or larval stage (Fig. 4A-B). Microscopic  
172 analysis of larvae and embryos showed that the tracheal segment separated at the larval  
173 stage (Fig. 4E), however, the disconnection of segments was due to the failure of their  
174 fusion at the beginning of tracheal development (Fig. 4C and 4D). In contrast with animals  
175 that ectopically expressed *upd3*, more animals expressing *Hop.CA* exhibited an intact  
176 tracheal tree (Fig. 4D). However, they all died at the first larval stage, which indicates that  
177 JAK/STAT signaling can influence both tracheal formation and growth.

178 To elucidate the effects of JAK/STAT upregulation in the tracheal system, we employed the  
179 temperature inducible Gal4/Gal80[ts] system which could initiate activation of the  
180 signaling pathway at different time points during larval development (Fig. S3A). We first  
181 tested the effects of inhibition of the tracheal JAK/STAT pathway induced by ectopic  
182 expression of *Dome.DN* on the animals. Ectopic expression was initiated at three time  
183 points during larval development (Fig. S3B). Larval mortality was higher, the earlier  
184 expression was initiated. No larvae survived to the pupal stage (Fig. S3C). On the other  
185 hand, activation of JAK/STAT signaling induced by ectopic expression of *upd3* or *Hop.CA*  
186 led to lower levels of larval death (Fig. S3B). In both cases, no pupae developed into adults  
187 (Fig. S3C). Furthermore, we analyzed the effects of this intervention on tracheal structure.  
188 Whereas *Dome.DN* overexpression elicited only minor effects on tracheal structure, *upd3*

189 or *Hop.CA* overexpression caused substantial epithelial thickening (Fig. 4F). Quantitative  
190 measurements revealed that ectopic overexpression of *Hop.CA* greatly increased  
191 epithelial thickness up to more than 10-fold (Fig. 4H). Experiments involving mosaic  
192 expression of *Hop.CA* driven by *vvl-FLP*, *CoinFLP-Gal4*, *UAS-EGFP (vvl-coin)* demonstrated  
193 that this effect was cell-autonomous. In the same trachea, cells that expressed *Hop.CA*  
194 were much thicker than their neighboring cells that did not express *Hop.CA* (Fig. 4I). The  
195 thicker epithelium could be caused by increased cell volume, increased cell number, or  
196 reduced tube surface area. To elucidate the mechanisms underlying this structural  
197 response, we analyzed the phenotype in more detail. Consequently, the length-thickness  
198 (Fig. 4G) product mirrored the findings made when assessing thickness (Fig. 4J). However,  
199 the number of cells in the dorsal trunk of Tr8, or DT8 of the trachea with manipulated  
200 JAK/STAT signaling was like that in matching controls (Fig. 4K). Hence, the thickening was  
201 due to an increase in cell volume, not an increase in cell number. To determine if this  
202 thickening is an artifact caused by the isolation method, we directly fixed the trachea *in*  
203 *situ* or isolated it in cell culture medium with the same osmolarity as the hemolymph. The  
204 same thickening was observed in both cases (Fig. S4). To quantify the time course of this  
205 thickening, we subjected the trachea to different treatment regimens prior to analysis. At  
206 least 2 days of ectopic expression were necessary to induce this phenotype (Fig. S5).

207 The effects of activating the JAK/STAT pathway on the epithelium were time-dependent  
208 (Fig. 4F). To determine if a weaker expression of *Hop.CA* induces similar phenotypes, we

209 used another trachea-specific Gal4-driver, namely, *nach-Gal4* (also called *ppk4-Gal4*). In  
210 the *nach-Gal4* line, *Gal4* is expressed from the late embryo stage. Moreover, it is strongly  
211 expressed in the early L1 and late L2 stages, at which point expression is stronger than  
212 that driven by *btl-Gal4* but is weakly expressed at other larval stages (Liu et al., 2003;  
213 Wagner et al., 2009). Microscopic analysis of the trachea showed that weak expression of  
214 *Hop.CA* in the trachea promoted epithelial thickening (Fig. 4L). However, epithelial  
215 thickening after 4 days of *Hop.CA* induction was lower in *nach>Hop.CA* than in *btl>Hop.CA*  
216 (Fig. 4M). On the other hand, weakly driven *upd3* expression in the trachea resulted in  
217 identical increases in the thickness as those observed using *btl-Gal4* (Fig. 4N). Finally, we  
218 used the same driver to inhibit JAK/STAT signaling in the trachea by expressing *Dome.DN*.  
219 Animals died prematurely at the larval stage and their trachea were filled with liquid,  
220 demonstrating that functionality was strongly impaired (Fig. 4O). As activation of the IMD  
221 pathway by PGRP-LC overexpression induced a very similar phenotype (Wagner et al.,  
222 2021), we tested the hypothesis that both, IMD- and JAK/STAT- activation act in the same  
223 pathway. Therefore, we activated the IMD-pathway (via PGRP-LC overexpression) while  
224 concurrently silencing JAK/STAT signaling (via STAT92e-RNAi) and found no rescue of the  
225 thickening phenotype (Fig. 4P).

226 Treatment with various JAK inhibitors (Roskoski, 2016) reversed epithelial thickening  
227 induced by ectopic overexpression of *Hop.CA* in the trachea (Fig. 4Q). Treatment with  
228 Baricitinib, Oclacitinib, or Filgotinib reduced epithelial thickening by more than 60%

229 therewith showing its potential in interfering with the JAK/STAT signaling pathway and the  
230 induced pathological situations (Fig. 4R).

### 231 **Transcriptomic response to enhanced JAK/STAT signaling**

232 To investigate the molecular mechanisms underlying the effects of chronic JAK/STAT  
233 activation on the airways, we performed mRNA-sequencing analysis of tracheal cells  
234 expressing *Hop.CA* in third instar larvae. The validity of this experimental procedure was  
235 controlled by measuring transcript levels of *hopscotch* (including *Hop.CA*) and *Socs36E*  
236 (one of the best-characterized STAT92E target genes) (Bach et al., 2007), which were  
237 upregulated 35-fold and 2.7-fold, respectively ( $p < 10^{-12}$ ) (Fig. S6B). Principal component  
238 analysis of biological replicates separated control and overexpression samples into  
239 different groups (Fig. S6A, inner region). Finally, the analysis revealed that the expression  
240 of 2004 genes was statistically significantly regulated ( $p < 0.05$ ;  $> 1.5$  fold up or down),  
241 with 1128 downregulated genes and 876 upregulated genes ( $p < 0.05$ ). A circular heatmap  
242 of a subgroup of them under more stringent conditions with 707 differentially expressed  
243 genes ( $p < 0.01$  and fold change  $> 2$ ) is shown (Fig. S6A). Moreover, we analyzed changes  
244 in expression upon ectopic silencing of the JAK/STAT pathway using *Dome.DN*. A Venn  
245 diagram revealed that there was a statistically significant overlap in the cohorts of genes  
246 regulated by both interventions (Fisher's exact test,  $p < 0.0001$ ; Fig. S6C).

247 To further elucidate the molecular mechanisms functioning in the thickened epithelium,  
248 we performed promotor scan studies and functional enrichment analyses. Genes with the

249 highest rates of induction supported by the lowest p-values were subjected to promoter  
250 scanning (Pscan) analysis. Putative genes directly regulated by the JAK/STAT pathway were  
251 identified (Tab. 1 and Tab. 2). Among these highly regulated genes, the largest group  
252 contained genes that encoded products involved in innate immunity, including seven  
253 antimicrobial peptide genes (*IM1 (BomS1)*, *IM2 (BomS2)*, *IM4 (Dso1)*, *IM14 (Dso2)*,  
254 *CG5791 (BomBc3)*, *CG5778 (BomT3)*, and *Drs*). All these antimicrobial peptides, except for  
255 *Drs*, contain one or two CXXC regions. These CXXC-containing peptides belong to the  
256 family of Bomanins, whose expression is highly induced following bacterial or fungal  
257 infection, and high levels of the corresponding mature peptides are found in the  
258 hemolymph of infected flies (Lindsay et al., 2018).

259 Next, we analyzed all significantly regulated genes based on KEGG and GO annotations.  
260 Six KEGG pathways and ten categories in GO analysis were enriched in the comparison of  
261 the *Hop.CA* expressing trachea compared with the matching controls (Tab. S1 and Fig. 5A-  
262 B). One striking feature of the epithelium with chronically activated JAK/STAT signaling  
263 was the induced expression of genes involved in “vesicle-mediated transport processes”  
264 (Fig. 5A). GO enrichment analysis demonstrated that this term was shared by 32 regulated  
265 genes. All these genes were upregulated, except for one (*CG5946*). However, according to  
266 a Pscan analysis, these genes did not seem to be direct JAK/STAT targets since predicted  
267 STAT92E promoter binding sites were not enriched in the corresponding promoter regions  
268 (Tab. S2 and S3). The transcript levels of genes that could be assigned for the term

269 “epicuticle development” were reduced. Here, fifty-five genes relevant to cuticle  
270 development were regulated, of which 40 were downregulated. In addition, other  
271 biological processes such as “muscle cell differentiation”, “cellular protein-containing  
272 complex assembly”, “RNA processing, translation”, and “detection of chemical stimuli”  
273 were significantly enriched. In the latter three categories, the number of upregulated  
274 genes was like the number of downregulated genes. A schematic representation of the  
275 different biological processes superimposed on a scheme of an epithelial cell is shown (Fig.  
276 5B). These alterations at the transcript level were reminiscent of the finding in allergic  
277 airways disease, where the expression of cell adhesion molecules or their transport to the  
278 membrane of airway epithelial cells are impaired (Bonnelykke et al., 2014; Giridhar et al.,  
279 2016; Heijink et al., 2020; Xiao et al., 2011). To test this, we analyzed mouse lungs of an  
280 experimental asthma model based on the usage of OVA for sensitization (Fig. 5C-E). Those  
281 animals of the asthma model displayed typical structural changes in the airways (Fig. 5D)  
282 and the relevant proinflammatory cytokines showed the anticipated increase in  
283 expression (Fig. 5E). Consistent with the effects observed in *Drosophila*, the expression of  
284 genes involved in the biological process vesicle transport were significantly affected in  
285 those mice with an induced experimental allergic airway disease (Fig. 5F) and most of  
286 these differentially expressed genes were increased.

287 **Impairment of protein transport in airway epithelial cells with chronically enhanced**  
288 **JAK/STAT signaling**



289 To evaluate if the transport capacities in the *Drosophila* airway epithelial cells is improved  
290 or impaired, we focused on two peripheral membrane-associated proteins involved in  
291 cell-cell interactions. These proteins were Coracle (Cora), a component of the septate  
292 junctions, and Armadillo (Arm), a component of the adherens junctions. Both proteins  
293 depend on vesicle transport to reach their final destinations (Lock and Stow, 2005; Oshima  
294 and Fehon, 2011) (Fig. 6A). Immunofluorescence analysis of *Hop.CA*-overexpressing  
295 animals revealed that Arm and Cora accumulated in the cytoplasm, which is indicative of  
296 dysfunctional vesicle transport (Fig. 6B–E).

297 The transcriptome data revealed that “cuticle development” was another GO that was  
298 enriched. This process depends on the secretory abilities of epithelial cells in the larval  
299 trachea. Here, chitin-rich structures, called taenidia, are believed to make tubes flexible  
300 as well as sufficiently strong in order to avoid collapse (Glasheen et al., 2010). The chitin  
301 structure in the trachea showed a strongly reduced degree of regularity in *Hop.CA*-  
302 expressing animals compared with control ones (Fig. 7A-B). Chitin staining revealed that  
303 the highly organized structure of the chitinous intima was almost completely lost in  
304 *Hop.CA*-expressing animals (Fig. 7A'' and 7B''). The mosaic analysis demonstrated that the  
305 trachea was structurally disorganized exactly at those sites where *Hop.CA* was expressed  
306 (Fig. S7).

307 We propose a simple model that explains structural phenotypes mainly based on the  
308 impaired vesicle-mediated transport and the lack of adhesion-associated proteins to the

309 membrane, which is in line with previous findings about this biological process (Jayaram  
310 et al., 2008; Tsarouhas et al., 2007) (Fig. 7C). Lumen narrowing is another phenotype that  
311 might be caused by the dysfunction of the process which could be observed in our study  
312 as well. This is prominently seen when epithelial cells expressed *Hop.CA* at very high levels,  
313 as indicated by strong green fluorescence (Fig. 7D-E and Fig. S4).

314

## 315 **Discussion**

316 The present study aimed to clarify the generic role of the JAK/STAT pathway in the  
317 respiratory epithelium. We mainly used the fruit fly *Drosophila* because it has ideal  
318 characteristics for conducting this study. The unique features of this model allowed us to  
319 focus on the essentials, namely the entirety of the signaling pathway and its importance  
320 in respiratory epithelial cells. The JAK/STAT signaling pathway in mammals has a degree of  
321 redundancy and parallelism in all its levels, rarely observed in other signaling systems.  
322 However, this exceptionally high degree of parallelism hampers determining the significance  
323 of JAK/STAT signaling per se and whether it differs substantially from signaling through  
324 individual cytokines or receptors. As mentioned earlier, the *Drosophila* JAK/STAT signaling  
325 pathway is simple, allowing targeted manipulation. Here, we showed that 1) JAK/STAT  
326 signaling exhibited tonic activity in almost all respiratory epithelial cells, 2) that exposure  
327 to airborne stressors such as hypoxia or cigarette smoke enhanced its activity, 3) that  
328 blocking JAK/STAT signaling induces apoptosis, and that 4) ectopic activation in epithelial

329 cells induced several phenotypes reminiscent of those found in chronic inflammatory lung  
330 diseases such as epithelial thickening or narrowing of the airways. The main results 1-3  
331 are thematically very closely related. The tonus of JAK/STAT signaling shown in embryonic,  
332 larval, and adult airway epithelia suggests that this cellular function is essential as it  
333 probably ensures the survival of these epithelial cells. JAK/STAT signaling is required to  
334 maintain the cellular identity of airway epithelial cells (D'Amico et al., 2018) and is  
335 important for the response to airway epithelial injury and epithelial cell survival  
336 (Juncadella et al., 2013; Paris et al., 2020; Tadokoro *et al.*, 2014). This agrees with our  
337 studies, which revealed that blockade of the signaling pathway leads to apoptosis of  
338 airway epithelial cells of flies. Furthermore, it implies that the JAK/STAT pathway plays a  
339 central role in homeostatic processes in this organ, which also appears to be the case in  
340 mammalian airway epithelia. Perturbation of JAK/STAT signaling induces apoptosis in cell  
341 lines derived from airway epithelia (Zheng et al., 2016), and this is particularly relevant for  
342 tissues and cells that can still divide or grow (Quinton and Mizgerd, 2011). This ability to  
343 grow might be one reason for the high susceptibility of *Drosophila* airway epithelial cells  
344 to the blockade of JAK/STAT signaling. Thus, cytokines that activate the JAK/STAT signaling  
345 pathway act as survival factors, especially when repair mechanisms are operative.  
346 Functional JAK/STAT signaling is also required for regenerative processes after epithelial  
347 damage (Kida *et al.*, 2008; Paris *et al.*, 2020; Tadokoro *et al.*, 2014), the response to  
348 infections (Matsuzaki et al., 2006), and the reaction to hyperoxia (Hokuto et al., 2004).

349 This indicates that JAK/STAT signaling in mammalian airway epithelial cells and the  
350 *Drosophila* trachea is particularly relevant for a protective reaction to stressful stimuli. In  
351 *Drosophila*, we observed a basal level of JAK/STAT signaling in these cells, and this  
352 signaling was further activated in response to very strong stressors such as chronic  
353 exposure to smoke particles. An organ-autonomous JAK/STAT signaling system seems to  
354 be operative, composed of the cytokines Upd2 and Upd3 and the activated signaling  
355 pathway induced in the same regions of the tracheal system. A comparable, stress-  
356 induced system was identified in the intestinal epithelium of flies, where highly stressful  
357 insults targeting absorptive enterocytes induce the production and release of the cytokine  
358 Upd3 (Jiang et al., 2009; Miguel-Aliaga et al., 2018). In contrast to the intestine, where  
359 cytokines produced by stressed enterocytes induce the proliferation of stem cells to  
360 replenish the enterocyte pool, stem cells are not involved in the tracheal response.

361 Although a threshold level of JAK/STAT signaling is required for the functionality and  
362 survival of airway epithelial cells, excessive activation of this signaling is associated with  
363 several lung diseases such as lung cancer, acute lung injury, asthma, pulmonary fibrosis,  
364 and COPD (Adnot et al., 2019; Chen et al., 2021; D'Amico *et al.*, 2018; Dutta *et al.*, 2014;  
365 Gao et al., 2004; Milara *et al.*, 2018; Parakh et al., 2021; Prele et al., 2012; Simeone-Penney  
366 et al., 2007; Yew-Booth *et al.*, 2015; Zhang et al., 2012). The ectopic activation of JAK/STAT  
367 signaling in the fly's airway epithelium induced major structural changes, mainly to the  
368 architecture of tracheal cells. The mosaic analysis demonstrated that this effect was cell

369 autonomous. These structural changes of the trachea are reminiscent of those observed  
370 in asthma, COPD, acute lung injury, and lung cancer. Structural changes that permit  
371 fulfillment of the original function of epithelial cells are hallmarks of the epithelial-to-  
372 mesenchymal transition. In lung cancer, the epithelial-to-mesenchymal transition  
373 depends on JAK/STAT signaling (Liu et al., 2014).

374 Ectopic JAK/STAT pathway activation also induced complex transcriptomic alterations in  
375 airway epithelial cells. These changes also affected immune-relevant genes, such as those  
376 encoding antimicrobial peptides, mainly from the Bomanin family. This dependency of  
377 antimicrobial responses on JAK/STAT signaling is also seen in the mammalian airway  
378 epithelium (Choi et al., 2013; Simeone-Penney *et al.*, 2007). However, chronically  
379 activated JAK/STAT signaling perturbed secretory processes and the formation of  
380 extracellular structures. The extracellular matrix defects caused by *Hop.CA* overexpression  
381 are reminiscent of the pathophysiology of the aforementioned chronic lung diseases that  
382 involve responses to acute or chronic injury (Fahy and Dickey, 2010). Therefore, attempts  
383 to enhance the repair capacities of epithelial cells by inducing structural changes via  
384 excessive JAK/STAT signaling would also perturb normal cellular functions, such as the  
385 transport of junction proteins to the membrane. This would lead to a reduced barrier  
386 function of the epithelium, which is a hallmark of chronic lung diseases such as asthma  
387 and COPD (Georas and Rezaee, 2014; Gon and Hashimoto, 2018; Heijink et al., 2012). We

388 also observed epicuticular changes, which considerably influenced the structure of the  
389 whole organ. However, it is difficult to identify an equivalent response in vertebrates.

390 Furthermore, our finding that the JAK/STAT signaling pathway operates in airway epithelial  
391 cells of embryos, larvae, and adults implies that it plays a central role in these cells at all  
392 developmental stages. The JAK/STAT pathway is involved in the embryonic development  
393 of the tracheal system (Hombria and Sotillos, 2013). We clarified the sequence of  
394 developmental steps in which this signaling pathway plays a central role. The JAK/STAT  
395 signaling pathway is particularly relevant for developing and maintaining the dorsal trunk.  
396 It is a matter of debate, whether JAK/STAT signaling is essential for mammalian lung  
397 development. However, the prevailing view that JAK/STAT signaling is not essential for  
398 embryonic lung development (Tadokoro et al., 2014) has been challenged by recent  
399 studies (Pairo et al., 2018). Although JAK/STAT signaling is essential for different aspects  
400 of tracheal development, the major focus of the current study was to understand its role  
401 in maintaining homeostasis in the fully functional airway epithelium.

402 The JAK/STAT pathway is an excellent target for therapeutic intervention in many lung  
403 diseases, including asthma, COPD, acute lung injury, idiopathic pulmonary fibrosis, and  
404 lung cancer (Athari, 2019; Loh et al., 2019; Milara *et al.*, 2018; Severgnini et al., 2004; Song  
405 et al., 2011; Yew-Booth *et al.*, 2015). We demonstrated that pharmacological interference  
406 of the JAK/STAT signaling pathway reverted the structural phenotype observed upon  
407 ectopic activation of this signaling and, consequently flies survived. This shows that the

408 *Drosophila* model is not only suitable to study the structural effects of excessive JAK/STAT  
409 signaling and the underlying molecular mechanisms but also to screen compounds and  
410 thereby identify novel therapeutic strategies. Moreover, the intrinsic architecture of the  
411 *Drosophila* system allows the prediction that the major site of action is the airway  
412 epithelium, thus implying that inhalation would be the ideal route of drug administration  
413 in a therapeutic setting.

414 It should be remembered that the vertebrate lung and insect trachea are not homologous.  
415 Nevertheless, both airway systems share a high degree of similarity regarding their  
416 development, physiology, innate immunity, and operative signaling systems (Andrew and  
417 Ewald, 2010; Bergman et al., 2017). Therefore, the fruit fly is a valuable tool for studying  
418 genes associated with a great variety of chronic lung diseases, including asthma, COPD,  
419 and lung cancer (Bossen et al., 2019; Kallsen et al., 2015; Levine and Cagan, 2016; Prange  
420 et al., 2018; Roeder et al., 2009; Roeder et al., 2012). This simple model can be used as  
421 part of an experimental toolbox to elucidate the role of JAK/STAT signaling in the airways  
422 and the effects of chronic deregulation of this signaling. In addition, it provides a readily  
423 accessible experimental system that is amenable to pharmacologic interventions and  
424 allows hypotheses and intervention strategies to be easily tested.

425

## 426 **Material and Methods**

427 ***Drosophila* strains and husbandry**

428 *STAT92E-GFP* was used to monitor the activation of the pathway (Bach et al., 2007); the  
429 Gal4-UAS system (Brand and Perrimon, 1993) was used to target ectopic expression to the  
430 tracheal system. Gal4 drivers used were: *btl-Gal4*, *UAS-GFP* on the 3rd chromosome, and  
431 *btl-Gal4*, *UAS-GFP* on the 2nd chromosome (obtained from the Leptin group, Heidelberg,  
432 Germany); *upd2-Gal4*; *upd3-Gal4* (Prange et al., 2018); *nach-Gal4* (Liu et al., 2003). The  
433 UAS responders included: *UAS-LacZ.nls* (BDSC 3956), *UAS-dome $\Delta$ cyt2.1* (*UAS-Dome.DN*)  
434 and *UAS-Hop.CA* (*UAS-hopTumL*) were obtained from N. Perrimon (Brown et al., 2001;  
435 Harrison et al., 1995). The *UAS-upd3* was constructed in our lab. *TubP-Gal80[ts]* (BDSC  
436 7018) was obtained from the Bloomington stock center. Unless otherwise stated, the flies  
437 were raised on standard medium at 25 °C with 50–60% relative humidity under a 12:12 h  
438 light/dark cycle as described earlier (Fink et al., 2016).

439 **Coin-FLP expression system**

440 *Vvl-FLP/CyO*; *btl-moe.mRFP* (BDSC 64233), *tubP-Gal80[ts]* and *CoinFLP-Gal4*, *UAS-2xEGFP*  
441 (BDSC 58751) were used to construct animals for the tracheal mosaic analysis. Ventral  
442 veins lacking (*vvl*) was expressed in larval tracheal clones that covered approximately 30  
443 to 80% of the trachea (Bosch et al., 2015; Chen and Krasnow, 2014). The genotype of the  
444 flies was *vvl-FLP*, *CoinFLP-Gal4*, *UAS-2xEGFP/CyO* (*vvl-coin*) and *vvl-FLP*, *CoinFLP-Gal4*,  
445 *UAS-2xEGFP/CyO*; *tub-Gal80[ts]* (*vvl-coin.ts*).



446 **Developmental viability**

447 For developmental viability of eggs, the eggs were collected overnight and were not  
448 physically handled in any way. The number of the hatched eggs and the pupae were  
449 counted starting from two days after the collection. Each group has 4 replicates that  
450 included more than 20 eggs. For developmental viability of larvae, *tub-Gal80[ts]* was used  
451 to limit UAS responder expression at the larvae stage. Animals were raised at 18 °C to keep  
452 the UAS responder gene silent. Larvae at different instar stages were transferred to a new  
453 medium at 29 °C. In this study, usually 4 replicates were performed with 30 larvae. The  
454 stage of larvae was determined via the appearance of anterior spiracles.

455 **Determination of epithelial thickness**

456 The trachea of L2 and L3 Larvae were carefully dissected from the posterior side of the  
457 body in PBS. The isolated trachea were immersed in 50% glycerol and digital images were  
458 captured within 15 min. L2 Larvae were distinguished from L3 larvae by the appearance  
459 of anterior spiracles. The relative ages of L3 larvae were inferred from the size of the  
460 animal. 30 larvae were used in each group and specimens were analyzed by Image J.

461 **Drug application in *Drosophila***

462 JAK inhibitors (Baricitinib #16707, Oclacitinib #18722, Filgotinib #17669 - Cayman  
463 Chemicals, Michigan, USA) were diluted in DMSO [100 mM]. For later application the  
464 inhibitors were diluted 1:10 in 100% EtOH. We used 20 µl of each diluted inhibitor for 2

465 ml of concentrated medium (5% yeast extract, 5% corn flour, 5% sucrose, 1% low-melt  
466 agarose, 1 ml of 10% propionic acid and 3 ml of 10% Nipagin). The eggs of each crossing  
467 have been applied on the modified medium and kept at 20 °C until the larvae reach  
468 the L2 stage. Afterwards they were incubated at 30 °C for 2 days to induce the *btl-Gal4*,  
469 *UAS-GFP; tub-Gal80[ts] (btl.ts)*–driver. The trachea of L3 Larvae were carefully dissected  
470 from the posterior side of the body in PBS. Isolated trachea was immersed in 50% glycerol  
471 and digital images were captured in 15 min. 10 larvae were used for each group.

472

#### 473 **Experimental design for hypersensitivity pneumonitis in mice**

474 Experimental design for hypersensitivity pneumonitis contains two processes,  
475 sensitization and challenge of mice with ovalbumin (Sigma Aldrich, A5503). The protocol  
476 refers to the protocol that (Daubeuf and Frossard, 2013) described with a few  
477 modifications. 8 week-old Balb/C mice were sensitized with intraperitoneal injections of  
478 20 µg of OVA emulsified in aluminum hydroxide in a total volume of 1 ml on days 7 and  
479 14, followed by 3 consecutive challenges each day by exposure to OVA or PBS aerosol for  
480 30 min. Mice were sacrificed 24 h following the final challenge. The left lungs were  
481 collected for histological analysis and the superior lobes were dissected for RNA analysis.  
482 6 mice per group were used in this experiment and 4 mice were randomly selected in  
483 each group for analyses. Total mRNA sequencing, data processing, and statistical analysis  
484 were performed by Genesky (Shanghai, China). The experimental protocols were

485 approved by the Animal Care and Protection Committee of Weifang Medical University  
486 (2021SDL418).

#### 487 **AB-PAS staining and immunofluorescence analysis of mouse lung**

488 Mice were sacrificed in excess CO<sub>2</sub> gas. The lungs of euthanized mice were inflated by  
489 intratracheal injection of cold 4% paraformaldehyde and then were fixed and embedded  
490 in paraffin as described in (Baligar et al., 2016). AB-PAS staining, and Immunofluorescence  
491 analysis were supported by Servicebio (Wuhan, China). All sections were photographed  
492 using a microscope slide scanner (Pannoramic MIDI: 3Dhistech). The materials and  
493 methods could be found at the following link [https://www.servicebio.cn/data-](https://www.servicebio.cn/data-detail?id=3040&code=MYYGSYBG)  
494 [detail?id=3040&code=MYYGSYBG](https://www.servicebio.cn/data-detail?id=3040&code=MYYGSYBG) and [https://www.servicebio.cn/data-](https://www.servicebio.cn/data-detail?id=3595&code=RSSYBG)  
495 [95&code=RSSYBG](https://www.servicebio.cn/data-detail?id=3595&code=RSSYBG). We list the main reagents here: AB-PAS solution set (Servicebio,  
496 G1049), Anti-CD11b (Servicebio, GB11058) and DAPI (Servicebio, G1012-10ML).

#### 497 **Time-lapse microscopy**

498 All images were acquired using a ZEISS Axio Image Z1 and a ZEISS LSM 880 fluorescent  
499 microscope (INST 257/591-1 FUGG). Embryos were dechorionated in 3% sodium  
500 hypochlorite and immersed in Halocarbon oil 700 (Sigma Aldrich, 9002-83-9). Then the  
501 embryos were imaged after stage 15 when the tracheal tree formed at 3 hours intervals.  
502 40 embryos were investigated in each group.

#### 503 **Cigarette smoke and hypoxic exposure**

504 All cigarette smoke exposure experiments were carried out in a smoking chamber,  
505 attached to a diaphragm pump. Common research 3R4F cigarettes (CTRP, Kentucky  
506 University, Lexington, USA) were used for all experiments. The vials containing animals  
507 were capped with a monitoring grid to allow the cigarette smoke to diffuse into the vial.  
508 For long-time smoke experiments, L2 larvae were exposed to smoke three times a day for  
509 30 min each, on two consecutive days. For heavy smoke experiments, L3 larvae were  
510 exposed to smoke of 2 cigarettes for 45 min, which led to about 35-50% mortality. To study  
511 the effects of hypoxia on the activity of JAK/STAT signaling pathway, larvae were exposed  
512 to long-term hypoxia and short-term hypoxia separately. For long-term hypoxia  
513 experiments, L2 larvae were exposed to 5% oxygen three times a day for 30 min each, on  
514 two consecutive days. For short-term hypoxia experiments, L3 larvae were exposed to 1%  
515 oxygen once for 5 hours. At least 20 animals in 4 vials were investigated in each group.

#### 516 **Immunohistochemistry of *Drosophila* trachea**

517 Larvae were dissected by ventral filleting and fixed in 4% paraformaldehyde for 30 min.  
518 Embryos were staged according to Campos-Ortega and Hartenstein (Campos-Ortega and  
519 Hartenstein, 1997) and fixed in 4% formaldehyde for 30 min. Immunostaining followed  
520 standard protocols as described earlier (Jeon et al., 2008; Levi et al., 2006). GFP signals  
521 were amplified by immunostaining with polyclonal rabbit anti-GFP (used at 1:500, Sigma-  
522 Aldrich, Merck KGaA, Darmstadt, Germany, SAB4301138). 40-1a (used at 1:50, DSHB, Iowa  
523 City, USA) was used to detect Beta-galactosidase. Coracle protein was detected with a

524 monoclonal mouse anti-coracle antibody (used at 1:200, DSHB, Iowa City, USA, C566.9).  
525 Armadillo protein was detected with a monoclonal mouse anti-armadillo antibody (DSHB,  
526 US, N2 7A1, used at 1:500). A monoclonal rabbit Cleaved *Drosophila* Dcp1 (used at 1:200,  
527 Cell Signaling, Frankfurt/M, Germany, #9578) was used to detect apoptotic cells.  
528 Secondary antibodies used were: Cy3-conjugated goat-anti-mouse, Cy3-conjugated goat-  
529 anti-rabbit, Alexa488-conjugated goat-anti-mouse (used at 1:500, Jackson  
530 Immunoresearch, Dianova, Hamburg, Germany), Alexa488-conjugated goat-anti-rabbit  
531 (used at 1:500, Cell signaling, Frankfurt/M, Germany, #9578). Tracheal chitin was stained  
532 with 505 star conjugated chitin-binding probe (NEB, Frankfurt/M, Germany, used at 1:300).  
533 Nuclei were stained with 4',6-Diamidino-2-Phenylindole, Dihydrochloride (DAPI) (Roth,  
534 Karlsruhe, Germany, 6843). 30 specimens were investigated in each group. Specimens  
535 were analyzed and digital images were captured either with a confocal (Zeiss LSM 880,  
536 Oberkochen, Germany) or a conventional fluorescence microscope (ZEISS Axio Imager Z1,  
537 Zeiss, Oberkochen, Germany), respectively.

### 538 **RNA isolation and RNA sequencing**

539 For the gene expression analysis of 3rd instar larvae trachea, animals were dissected in  
540 cold PBS and isolated trachea transferred to RNA Magic (BioBudget, Krefeld, Germany)  
541 and processed essentially as described earlier (Prange et al., 2018) with slight  
542 modifications. The tissue was homogenized in a Bead Ruptor 24 (BioLab products,  
543 Bebensee, Germany) and the RNA was extracted by using the PureLink RNA Mini Kit

544 (Thermo Fisher, Waltham, MA, USA) for phase separation with the RNA Magic reagent. An  
545 additional DNase treatment was performed following the on-column PureLink DNase  
546 treatment protocol (Thermo Fisher, Waltham, MA, USA).

547 Sequencing libraries were constructed using the TruSeq stranded mRNA kit (Illumina, San  
548 Diego, USA) and 50 bp single-read sequencing was performed on an Illumina HiSeq 4000  
549 with 16 samples per lane. Resulting sequencing reads were trimmed for low-quality bases  
550 and adapters using the fastq Illumina filter (<http://cancan.cshl.edu/labmembers/gordon>  
551 [/fastq\\_illumina\\_filter/](http://fastq_illumina_filter/)) and cutadapt (version 1.8.1) (Martin, 2011). Transcriptomics  
552 analysis including gene expression values and differential expression analysis was done  
553 using CLC Genomics Workbench. The detailed protocols can be obtained from the CLC  
554 Web site (<http://www.clcbio.com/products/clc-genomics-workbench>). *Drosophila*  
555 *melanogaster* reference genome (Release 6) (Hoskins et al., 2015) was used for mapping  
556 in this research.

557 The transcription factor binding site enrichment and the Gene Ontology enrichment  
558 analyses of the differentially expressed genes were carried out using Pscan  
559 (<http://159.149.160.88/pscan/>) and online GO enrichment analysis (<http://geneontology.org/>), respectively. We chose -450- 50 bases of the annotated transcription start site of  
560 the genes as the transcription factor binding sites for enrichment analysis. The analysis  
561 performed with the TFBSs matrices that is available in the JASPAR databases (version

563 Jaspar 2018\_NR). Data were visualized through the circos software  
564 <http://circos.ca/software/>.

565

## 566 **Statistics and reproducibility**

567 We did not use statistical methods to predetermine sample sizes but the sample sizes used  
568 in this study are similar or higher as those used in previous studies (Proske et al., 2021;  
569 Wagner *et al.*, 2021). Specific approaches to randomly allocate samples to groups were  
570 not used and the experiments were not performed in a blinded design. No data were  
571 excluded from the analysis. Prism (GraphPad version 7) was used for statistical analyses  
572 and the corresponding tests used are listed in the figure legends.

573

574 Acknowledgments

## 575 **Funding**

576 This work was funded by the DFG as part of the CRC 1182 and by funding of the CLSM  
577 (INST 257/591-1 FUGG). Moreover, Xiao Niu received funds from the Chinese Scholarship  
578 Council and Weifang Medical University. Leizhi Shi received funds from the Linyi People's  
579 Hospital.

580

## 581 **References**

582

583 Adnot, S., Lipskaia, L., and Bernard, D. (2019). The STATus of STAT3 in Lung Cell Senescence? *Am J Respir*  
584 *Cell Mol Biol* *61*, 5-6. 10.1165/rcmb.2019-0013ED.

585 Andrew, D.J., and Ewald, A.J. (2010). Morphogenesis of epithelial tubes: Insights into tube formation,  
586 elongation, and elaboration. *Dev Biol* *341*, 34-55. 10.1016/j.ydbio.2009.09.024.

587 Arbouzova, N.I., and Zeidler, M.P. (2006). JAK/STAT signalling in *Drosophila*: insights into conserved  
588 regulatory and cellular functions. *Development* *133*, 2605-2616. 10.1242/dev.02411.

589 Athari, S.S. (2019). Targeting cell signaling in allergic asthma. *Signal Transduct Target Ther* *4*, 45.  
590 10.1038/s41392-019-0079-0.

591 Bach, E.A., Ekas, L.A., Ayala-Camargo, A., Flaherty, M.S., Lee, H., Perrimon, N., and Baeg, G.H. (2007). GFP  
592 reporters detect the activation of the *Drosophila* JAK/STAT pathway in vivo. *Gene Expr Patterns* *7*, 323-331.  
593 10.1016/j.modgep.2006.08.003.

594 Baligar, P., Pokhrel, S., and Mukhopadhyay, A. (2016). Experimental Liver Fibrosis and Intrasplenic  
595 Transplantation of CD45+ Bone Marrow Cells. *Bio-protocol* *6*, e1972. 10.21769/BioProtoc.1972.

596 Bergman, P., Seyedoleslami Esfahani, S., and Engstrom, Y. (2017). *Drosophila* as a Model for Human  
597 Diseases-Focus on Innate Immunity in Barrier Epithelia. *Curr Top Dev Biol* *121*, 29-81.  
598 10.1016/bs.ctdb.2016.07.002.

599 Bonnelykke, K., Sleiman, P., Nielsen, K., Kreiner-Moller, E., Mercader, J.M., Belgrave, D., den Dekker, H.T.,  
600 Husby, A., Sevelsted, A., Faura-Tellez, G., et al. (2014). A genome-wide association study identifies CDHR3  
601 as a susceptibility locus for early childhood asthma with severe exacerbations. *Nat Genet* *46*, 51-55.  
602 10.1038/ng.2830.

603 Bosch, J.A., Tran, N.H., and Hariharan, I.K. (2015). CoinFLP: a system for efficient mosaic screening and for  
604 visualizing clonal boundaries in *Drosophila*. *Development* *142*, 597-606. 10.1242/dev.114603.

605 Bossen, J., Uliczka, K., Steen, L., Neugebauer, P., Mai, M.M., Fink, C., Stracke, F., Heine, H., and Roeder, T.  
606 (2021). Driver mutations in major lung cancer oncogenes can be analyzed in *Drosophila* models. *ALTEX* *38*,  
607 235-244. 10.14573/altex.1912131.

608 Bossen, J., Uliczka, K., Steen, L., Pfefferkorn, R., Mai, M.M., Burkhardt, L., Spohn, M., Bruchhaus, I., Fink, C.,  
609 Heine, H., and Roeder, T. (2019). An EGFR-Induced *Drosophila* Lung Tumor Model Identifies Alternative  
610 Combination Treatments. *Mol Cancer Ther* *18*, 1659-1668. 10.1158/1535-7163.MCT-19-0168.

611 Brand, A.H., and Perrimon, N. (1993). Targeted gene expression as a means of altering cell fates and  
612 generating dominant phenotypes. *Development* *118*, 401-415.

613 Brown, S., Hu, N., and Hombria, J.C. (2001). Identification of the first invertebrate interleukin JAK/STAT  
614 receptor, the *Drosophila* gene *domeless*. *Curr Biol* *11*, 1700-1705. 10.1016/s0960-9822(01)00524-3.

615 Campos-Ortega, J.A., and Hartenstein, V. (1997). *The Embryonic Development of Drosophila melanogaster*  
616 (Springer-Verlag Berlin Heidelberg). 10.1007/978-3-662-22489-2.

617 Chen, F., and Krasnow, M.A. (2014). Progenitor outgrowth from the niche in *Drosophila* trachea is guided  
618 by FGF from decaying branches. *Science* *343*, 186-189. 10.1126/science.1241442.



- 619 Chen, X., Miao, M., Zhou, M., Chen, J., Li, D., Zhang, L., Sun, A., Guan, M., Wang, Z., Liu, P., et al. (2021).  
620 Poly-L-arginine promotes asthma angiogenesis through induction of FGF1 in airway epithelial cells via  
621 activation of the mTORC1-STAT3 pathway. *Cell Death Dis* 12, 761. 10.1038/s41419-021-04055-2.
- 622 Choi, S.M., McAleer, J.P., Zheng, M., Pociask, D.A., Kaplan, M.H., Qin, S., Reinhart, T.A., and Kolls, J.K.  
623 (2013). Innate Stat3-mediated induction of the antimicrobial protein Reg3gamma is required for host  
624 defense against MRSA pneumonia. *J Exp Med* 210, 551-561. 10.1084/jem.20120260.
- 625 D'Amico, S., Shi, J., Martin, B.L., Crawford, H.C., Petrenko, O., and Reich, N.C. (2018). STAT3 is a master  
626 regulator of epithelial identity and KRAS-driven tumorigenesis. *Genes Dev* 32, 1175-1187.  
627 10.1101/gad.311852.118.
- 628 Daubeuf, F., and Frossard, N. (2013). Acute Asthma Models to Ovalbumin in the Mouse. *Curr Protoc*  
629 *Mouse Biol* 3, 31-37. 10.1002/9780470942390.mo120202.
- 630 Dutta, P., Sabri, N., Li, J., and Li, W.X. (2014). Role of STAT3 in lung cancer. *JAKSTAT* 3, e999503.  
631 10.1080/21623996.2014.999503.
- 632 Fahy, J.V., and Dickey, B.F. (2010). Airway mucus function and dysfunction. *N Engl J Med* 363, 2233-2247.  
633 10.1056/NEJMra0910061.
- 634 Fink, C., Hoffmann, J., Knop, M., Li, Y., Isermann, K., and Roeder, T. (2016). Intestinal FoxO signaling is  
635 required to survive oral infection in *Drosophila*. *Mucosal Immunol* 9, 927-936. 10.1038/mi.2015.112.
- 636 Gao, H., Guo, R.F., Speyer, C.L., Reuben, J., Neff, T.A., Hoesel, L.M., Riedemann, N.C., McClintock, S.D.,  
637 Sarma, J.V., Van Rooijen, N., et al. (2004). Stat3 activation in acute lung injury. *J Immunol* 172, 7703-7712.  
638 10.4049/jimmunol.172.12.7703.
- 639 Georas, S.N., Donohue, P., Connolly, M., and Wechsler, M.E. (2021). JAK inhibitors for asthma. *J Allergy Clin*  
640 *Immunol* 148, 953-963. 10.1016/j.jaci.2021.08.013.
- 641 Georas, S.N., and Rezaee, F. (2014). Epithelial barrier function: at the front line of asthma immunology and  
642 allergic airway inflammation. *J Allergy Clin Immunol* 134, 509-520. 10.1016/j.jaci.2014.05.049.
- 643 Giridhar, P.V., Bell, S.M., Sridharan, A., Rajavelu, P., Kitzmiller, J.A., Na, C.L., Kofron, M., Brandt, E.B.,  
644 Erickson, M., Naren, A.P., et al. (2016). Airway Epithelial KIF3A Regulates Th2 Responses to Aeroallergens. *J*  
645 *Immunol* 197, 4228-4239. 10.4049/jimmunol.1600926.
- 646 Glasheen, B.M., Robbins, R.M., Piette, C., Beitel, G.J., and Page-McCaw, A. (2010). A matrix  
647 metalloproteinase mediates airway remodeling in *Drosophila*. *Dev Biol* 344, 772-783.  
648 10.1016/j.ydbio.2010.05.504.
- 649 Gon, Y., and Hashimoto, S. (2018). Role of airway epithelial barrier dysfunction in pathogenesis of asthma.  
650 *Allergol Int* 67, 12-17. 10.1016/j.alit.2017.08.011.
- 651 Guha, A., Lin, L., and Kornberg, T.B. (2008). Organ renewal and cell divisions by differentiated cells in  
652 *Drosophila*. *Proc Natl Acad Sci U S A* 105, 10832-10836. 10.1073/pnas.0805111105.
- 653 Harrison, D.A., Binari, R., Nahreini, T.S., Gilman, M., and Perrimon, N. (1995). Activation of a *Drosophila*  
654 Janus kinase (JAK) causes hematopoietic neoplasia and developmental defects. *EMBO J* 14, 2857-2865.
- 655 Heijink, I.H., Brandenburg, S.M., Postma, D.S., and van Oosterhout, A.J. (2012). Cigarette smoke impairs  
656 airway epithelial barrier function and cell-cell contact recovery. *Eur Respir J* 39, 419-428.  
657 10.1183/09031936.00193810.

- 658 Heijink, I.H., Kuchibhotla, V.N.S., Roffel, M.P., Maes, T., Knight, D.A., Sayers, I., and Nawijn, M.C. (2020).  
659 Epithelial cell dysfunction, a major driver of asthma development. *Allergy* *75*, 1902-1917.  
660 10.1111/all.14421.
- 661 Hokuto, I., Ikegami, M., Yoshida, M., Takeda, K., Akira, S., Perl, A.K., Hull, W.M., Wert, S.E., and Whitsett,  
662 J.A. (2004). Stat-3 is required for pulmonary homeostasis during hyperoxia. *J Clin Invest* *113*, 28-37.  
663 10.1172/JCI19491.
- 664 Hombria, J.C., and Sotillos, S. (2013). JAK-STAT pathway in *Drosophila* morphogenesis: From organ selector  
665 to cell behavior regulator. *JAKSTAT* *2*, e26089. 10.4161/jkst.26089.
- 666 Hoskins, R.A., Carlson, J.W., Wan, K.H., Park, S., Mendez, I., Galle, S.E., Booth, B.W., Pfeiffer, B.D., George,  
667 R.A., Svirskas, R., et al. (2015). The Release 6 reference sequence of the *Drosophila melanogaster* genome.  
668 *Genome Res* *25*, 445-458. 10.1101/gr.185579.114.
- 669 Hu, X., Li, J., Fu, M., Zhao, X., and Wang, W. (2021). The JAK/STAT signaling pathway: from bench to clinic.  
670 *Signal Transduct Target Ther* *6*, 402. 10.1038/s41392-021-00791-1.
- 671 Isaac, D.D., and Andrew, D.J. (1996). Tubulogenesis in *Drosophila*: a requirement for the tracheless gene  
672 product. *Genes Dev* *10*, 103-117. 10.1101/gad.10.1.103.
- 673 Jayaram, S.A., Senti, K.A., Tiklova, K., Tsarouhas, V., Hemphala, J., and Samakovlis, C. (2008). COPI vesicle  
674 transport is a common requirement for tube expansion in *Drosophila*. *PLoS One* *3*, e1964.  
675 10.1371/journal.pone.0001964.
- 676 Jeon, M., Nguyen, H., Bahri, S., and Zinn, K. (2008). Redundancy and compensation in axon guidance:  
677 genetic analysis of the *Drosophila* Ptp10D/Ptp4E receptor tyrosine phosphatase subfamily. *Neural Dev* *3*,  
678 3. 10.1186/1749-8104-3-3.
- 679 Jiang, H., Patel, P.H., Kohlmaier, A., Grenley, M.O., McEwen, D.G., and Edgar, B.A. (2009). Cytokine/Jak/Stat  
680 signaling mediates regeneration and homeostasis in the *Drosophila* midgut. *Cell* *137*, 1343-1355.  
681 10.1016/j.cell.2009.05.014.
- 682 Jin, H., Ciechanowicz, A.K., Kaplan, A.R., Wang, L., Zhang, P.X., Lu, Y.C., Tobin, R.E., Tobin, B.A., Cohn, L.,  
683 Zeiss, C.J., et al. (2018). Surfactant protein C dampens inflammation by decreasing JAK/STAT activation  
684 during lung repair. *Am J Physiol Lung Cell Mol Physiol* *314*, L882-L892. 10.1152/ajplung.00418.2017.
- 685 Juncadella, I.J., Kadl, A., Sharma, A.K., Shim, Y.M., Hochreiter-Hufford, A., Borish, L., and Ravichandran, K.S.  
686 (2013). Apoptotic cell clearance by bronchial epithelial cells critically influences airway inflammation.  
687 *Nature* *493*, 547-551. 10.1038/nature11714.
- 688 Kallsen, K., Zehethofer, N., Abdelsadik, A., Lindner, B., Kabesch, M., Heine, H., and Roeder, T. (2015).  
689 ORMDL deregulation increases stress responses and modulates repair pathways in *Drosophila* airways. *J*  
690 *Allergy Clin Immunol* *136*, 1105-1108. 10.1016/j.jaci.2015.04.009.
- 691 Kida, H., Mucenski, M.L., Thitoff, A.R., Le Cras, T.D., Park, K.S., Ikegami, M., Muller, W., and Whitsett, J.A.  
692 (2008). GP130-STAT3 regulates epithelial cell migration and is required for repair of the bronchiolar  
693 epithelium. *Am J Pathol* *172*, 1542-1554. 10.2353/ajpath.2008.071052.
- 694 Kiu, H., and Nicholson, S.E. (2012). Biology and significance of the JAK/STAT signalling pathways. *Growth*  
695 *Factors* *30*, 88-106. 10.3109/08977194.2012.660936.
- 696 Levi, B.P., Ghabrial, A.S., and Krasnow, M.A. (2006). *Drosophila* talin and integrin genes are required for  
697 maintenance of tracheal terminal branches and luminal organization. *Development* *133*, 2383-2393.  
698 10.1242/dev.02404.

- 699 Levine, B.D., and Cagan, R.L. (2016). *Drosophila* Lung Cancer Models Identify Trametinib plus Statin as  
700 Candidate Therapeutic. *Cell Rep* *14*, 1477-1487. 10.1016/j.celrep.2015.12.105.
- 701 Lindsay, S.A., Lin, S.J.H., and Wasserman, S.A. (2018). Short-Form Bomanins Mediate Humoral Immunity in  
702 *Drosophila*. *J Innate Immun* *10*, 306-314. 10.1159/000489831.
- 703 Liu, L., Johnson, W.A., and Welsh, M.J. (2003). *Drosophila* DEG/ENaC pickpocket genes are expressed in the  
704 tracheal system, where they may be involved in liquid clearance. *Proc Natl Acad Sci U S A* *100*, 2128-2133.  
705 10.1073/pnas.252785099.
- 706 Liu, R.Y., Zeng, Y., Lei, Z., Wang, L., Yang, H., Liu, Z., Zhao, J., and Zhang, H.T. (2014). JAK/STAT3 signaling is  
707 required for TGF-beta-induced epithelial-mesenchymal transition in lung cancer cells. *Int J Oncol* *44*, 1643-  
708 1651. 10.3892/ijo.2014.2310.
- 709 Lock, J.G., and Stow, J.L. (2005). Rab11 in recycling endosomes regulates the sorting and basolateral  
710 transport of E-cadherin. *Mol Biol Cell* *16*, 1744-1755. 10.1091/mbc.e04-10-0867.
- 711 Loh, C.Y., Arya, A., Naema, A.F., Wong, W.F., Sethi, G., and Looi, C.Y. (2019). Signal Transducer and Activator  
712 of Transcription (STATs) Proteins in Cancer and Inflammation: Functions and Therapeutic Implication. *Front*  
713 *Oncol* *9*, 48. 10.3389/fonc.2019.00048.
- 714 Major, J., Crotta, S., Llorian, M., McCabe, T.M., Gad, H.H., Priestnall, S.L., Hartmann, R., and Wack, A.  
715 (2020). Type I and III interferons disrupt lung epithelial repair during recovery from viral infection. *Science*  
716 *369*, 712-717. 10.1126/science.abc2061.
- 717 Makris, S., Paulsen, M., and Johansson, C. (2017). Type I Interferons as Regulators of Lung Inflammation.  
718 *Front Immunol* *8*, 259. 10.3389/fimmu.2017.00259.
- 719 Martin, M. (2011). Cutadapt Removes Adapter Sequences From High-Throughput Sequencing Reads.  
720 *EMBnet.journal* *17*, 10-12. doi.org/10.14806/ej.17.1.200.
- 721 Matsuzaki, Y., Xu, Y., Ikegami, M., Besnard, V., Park, K.S., Hull, W.M., Wert, S.E., and Whitsett, J.A. (2006).  
722 Stat3 is required for cytoprotection of the respiratory epithelium during adenoviral infection. *J Immunol*  
723 *177*, 527-537. 10.4049/jimmunol.177.1.527.
- 724 Miguel-Aliaga, I., Jasper, H., and Lemaitre, B. (2018). Anatomy and Physiology of the Digestive Tract of  
725 *Drosophila melanogaster*. *Genetics* *210*, 357-396. 10.1534/genetics.118.300224.
- 726 Milara, J., Ballester, B., Morell, A., Ortiz, J.L., Escriva, J., Fernandez, E., Perez-Vizcaino, F., Cogolludo, A.,  
727 Pastor, E., Artigues, E., et al. (2018). JAK2 mediates lung fibrosis, pulmonary vascular remodelling and  
728 hypertension in idiopathic pulmonary fibrosis: an experimental study. *Thorax* *73*, 519-529.  
729 10.1136/thoraxjnl-2017-210728.
- 730 Morris, R., Kershaw, N.J., and Babon, J.J. (2018). The molecular details of cytokine signaling via the  
731 JAK/STAT pathway. *Protein Sci* *27*, 1984-2009. 10.1002/pro.3519.
- 732 Nogueira-Silva, C., Santos, M., Baptista, M.J., Moura, R.S., and Correia-Pinto, J. (2006). IL-6 is constitutively  
733 expressed during lung morphogenesis and enhances fetal lung explant branching. *Pediatr Res* *60*, 530-536.  
734 10.1203/01.pdr.0000242300.09427.3b.
- 735 Oshima, K., and Fehon, R.G. (2011). Analysis of protein dynamics within the septate junction reveals a  
736 highly stable core protein complex that does not include the basolateral polarity protein Discs large. *J Cell*  
737 *Sci* *124*, 2861-2871. 10.1242/jcs.087700.
- 738 Pandey, U.B., and Nichols, C.D. (2011). Human disease models in *Drosophila melanogaster* and the role of  
739 the fly in therapeutic drug discovery. *Pharmacol Rev* *63*, 411-436. 10.1124/pr.110.003293.

- 740 Parakh, S., Ernst, M., and Poh, A.R. (2021). Multicellular Effects of STAT3 in Non-small Cell Lung Cancer:  
741 Mechanistic Insights and Therapeutic Opportunities. *Cancers (Basel)* *13*. 10.3390/cancers13246228.
- 742 Paris, A.J., Hayer, K.E., Oved, J.H., Avgousti, D.C., Toulmin, S.A., Zepp, J.A., Zacharias, W.J., Katzen, J.B.,  
743 Basil, M.C., Kremp, M.M., et al. (2020). STAT3-BDNF-TrkB signalling promotes alveolar epithelial  
744 regeneration after lung injury. *Nat Cell Biol* *22*, 1197-1210. 10.1038/s41556-020-0569-x.
- 745 Perrimon, N., and Mahowald, A.P. (1986). *l(1)hopscotch*, A larval-pupal zygotic lethal with a specific  
746 maternal effect on segmentation in *Drosophila*. *Dev Biol* *118*, 28-41. 10.1016/0012-1606(86)90070-9.
- 747 Philips, R.L., Wang, Y., Cheon, H., Kanno, Y., Gadina, M., Sartorelli, V., Horvath, C.M., Darnell, J.E., Jr., Stark,  
748 G.R., and O'Shea, J.J. (2022). The JAK-STAT pathway at 30: Much learned, much more to do. *Cell* *185*, 3857-  
749 3876. 10.1016/j.cell.2022.09.023.
- 750 Piai, P., Moura, R.S., Baptista, M.J., Correia-Pinto, J., and Nogueira-Silva, C. (2018). STATs in Lung  
751 Development: Distinct Early and Late Expression, Growth Modulation and Signaling Dysregulation in  
752 Congenital Diaphragmatic Hernia. *Cell Physiol Biochem* *45*, 1-14. 10.1159/000486218.
- 753 Powers, N., and Srivastava, A. (2019). JAK/STAT signaling is involved in air sac primordium development of  
754 *Drosophila melanogaster*. *FEBS Lett* *593*, 658-669. 10.1002/1873-3468.13355.
- 755 Prange, R., Thiedmann, M., Bhandari, A., Mishra, N., Sinha, A., Hasler, R., Rosenstiel, P., Uliczka, K., Wagner,  
756 C., Yildirim, A.O., et al. (2018). A *Drosophila* model of cigarette smoke induced COPD identifies Nrf2  
757 signaling as an expedient target for intervention. *Aging (Albany NY)* *10*, 2122-2135.  
758 10.18632/aging.101536.
- 759 Prele, C.M., Yao, E., O'Donoghue, R.J., Mutsaers, S.E., and Knight, D.A. (2012). STAT3: a central mediator of  
760 pulmonary fibrosis? *Proc Am Thorac Soc* *9*, 177-182. 10.1513/pats.201201-007AW.
- 761 Proske, A., Bossen, J., von Frieling, J., and Roeder, T. (2021). Low-protein diet applied as part of  
762 combination therapy or stand-alone normalizes lifespan and tumor proliferation in a model of intestinal  
763 cancer. *Aging (Albany NY)* *13*, 24017-24036. 10.18632/aging.203692.
- 764 Quinton, L.J., and Mizgerd, J.P. (2011). NF-kappaB and STAT3 signaling hubs for lung innate immunity. *Cell*  
765 *Tissue Res* *343*, 153-165. 10.1007/s00441-010-1044-y.
- 766 Rawlings, J.S., Rosler, K.M., and Harrison, D.A. (2004). The JAK/STAT signaling pathway. *J Cell Sci* *117*, 1281-  
767 1283. 10.1242/jcs.00963.
- 768 Roeder, T., Isermann, K., and Kabesch, M. (2009). *Drosophila* in asthma research. *Am J Respir Crit Care*  
769 *Med* *179*, 979-983. 10.1164/rccm.200811-1777PP.
- 770 Roeder, T., Isermann, K., Kallsen, K., Uliczka, K., and Wagner, C. (2012). A *Drosophila* asthma model - what  
771 the fly tells us about inflammatory diseases of the lung. *Adv Exp Med Biol* *710*, 37-47. 10.1007/978-1-  
772 4419-5638-5\_5.
- 773 Roskoski, R., Jr. (2016). Janus kinase (JAK) inhibitors in the treatment of inflammatory and neoplastic  
774 diseases. *Pharmacol Res* *111*, 784-803. 10.1016/j.phrs.2016.07.038.
- 775 Sato, M., Kitada, Y., and Tabata, T. (2008). Larval cells become imaginal cells under the control of  
776 homothorax prior to metamorphosis in the *Drosophila* tracheal system. *Dev Biol* *318*, 247-257.  
777 10.1016/j.ydbio.2008.03.025.
- 778 Severgnini, M., Takahashi, S., Roza, L.M., Homer, R.J., Kuhn, C., Jhung, J.W., Perides, G., Steer, M., Hassoun,  
779 P.M., Fanburg, B.L., et al. (2004). Activation of the STAT pathway in acute lung injury. *Am J Physiol Lung Cell*  
780 *Mol Physiol* *286*, L1282-1292. 10.1152/ajplung.00349.2003.

781 Shiga, Y., M., T.M., and Hayashi, S. (1996). A nuclear GFP/ $\beta$ -galactosidase fusion protein as a marker for  
782 morphogenesis in living *Drosophila*. *Development, Growth & Differentiation* **38**, 99-106.  
783 doi.org/10.1046/j.1440-169X.1996.00012.x.

784 Simeone-Penney, M.C., Severgnini, M., Tu, P., Homer, R.J., Mariani, T.J., Cohn, L., and Simon, A.R. (2007).  
785 Airway epithelial STAT3 is required for allergic inflammation in a murine model of asthma. *J Immunol* **178**,  
786 6191-6199. 10.4049/jimmunol.178.10.6191.

787 Song, L., Rawal, B., Nemeth, J.A., and Haura, E.B. (2011). JAK1 activates STAT3 activity in non-small-cell  
788 lung cancer cells and IL-6 neutralizing antibodies can suppress JAK1-STAT3 signaling. *Mol Cancer Ther* **10**,  
789 481-494. 10.1158/1535-7163.MCT-10-0502.

790 Tadokoro, T., Wang, Y., Barak, L.S., Bai, Y., Randell, S.H., and Hogan, B.L. (2014). IL-6/STAT3 promotes  
791 regeneration of airway ciliated cells from basal stem cells. *Proc Natl Acad Sci U S A* **111**, E3641-3649.  
792 10.1073/pnas.1409781111.

793 Tsarouhas, V., Senti, K.A., Jayaram, S.A., Tiklova, K., Hemphala, J., Adler, J., and Samakovlis, C. (2007).  
794 Sequential pulses of apical epithelial secretion and endocytosis drive airway maturation in *Drosophila*. *Dev*  
795 *Cell* **13**, 214-225. 10.1016/j.devcel.2007.06.008.

796 Villarino, A.V., Kanno, Y., and O'Shea, J.J. (2017). Mechanisms and consequences of Jak-STAT signaling in  
797 the immune system. *Nat Immunol* **18**, 374-384. 10.1038/ni.3691.

798 Wagner, C., Isermann, K., and Roeder, T. (2009). Infection induces a survival program and local remodeling  
799 in the airway epithelium of the fly. *FASEB J* **23**, 2045-2054. 10.1096/fj.08-114223.

800 Wagner, C., Uliczka, K., Bossen, J., Niu, X., Fink, C., Thiedmann, M., Knop, M., Vock, C., Abdelsadik, A.,  
801 Zissler, U.M., et al. (2021). Constitutive immune activity promotes JNK- and FoxO-dependent remodeling  
802 of *Drosophila* airways. *Cell Rep* **35**, 108956. 10.1016/j.celrep.2021.108956.

803 Weaver, M., and Krasnow, M.A. (2008). Dual origin of tissue-specific progenitor cells in *Drosophila* tracheal  
804 remodeling. *Science* **321**, 1496-1499. 10.1126/science.1158712.

805 Xiao, C., Puddicombe, S.M., Field, S., Haywood, J., Broughton-Head, V., Puxeddu, I., Haitchi, H.M., Vernon-  
806 Wilson, E., Sammut, D., Bedke, N., et al. (2011). Defective epithelial barrier function in asthma. *J Allergy*  
807 *Clin Immunol* **128**, 549-556 e541-512. 10.1016/j.jaci.2011.05.038.

808 Yew-Booth, L., Birrell, M.A., Lau, M.S., Baker, K., Jones, V., Kilty, I., and Belvisi, M.G. (2015). JAK-STAT  
809 pathway activation in COPD. *Eur Respir J* **46**, 843-845. 10.1183/09031936.00228414.

810 Zeidler, M.P., and Bausek, N. (2013). The *Drosophila* JAK-STAT pathway. *JAKSTAT* **2**, e25353.  
811 10.4161/jkst.25353.

812 Zhang, X., Yue, P., Page, B.D., Li, T., Zhao, W., Namanja, A.T., Paladino, D., Zhao, J., Chen, Y., Gunning, P.T.,  
813 and Turkson, J. (2012). Orally bioavailable small-molecule inhibitor of transcription factor Stat3 regresses  
814 human breast and lung cancer xenografts. *Proc Natl Acad Sci U S A* **109**, 9623-9628.  
815 10.1073/pnas.1121606109.

816 Zheng, X.J., Yang, Z.X., Dong, Y.J., Zhang, G.Y., Sun, M.F., An, X.K., Pan, L.H., and Zhang, S.L. (2016).  
817 Downregulation of leptin inhibits growth and induces apoptosis of lung cancer cells via the Notch and  
818 JAK/STAT3 signaling pathways. *Biol Open* **5**, 794-800. 10.1242/bio.017798.

819

820

821 Table 1 Genes that were highly upregulated in response to *Hop.CA* overexpression.

| Name            | Maximum group mean | Fold change | FDR p-value |
|-----------------|--------------------|-------------|-------------|
| CG16772         | 11.85              | 135.44      | 0           |
| hop             | 286.06             | 35.43       | 0           |
| CG14570         | 42.21              | 35.37       | 0           |
| CG14147         | 55.31              | 32.88       | 0           |
| Hsp70Bb         | 161.51             | 29.99       | 0           |
| Ubx             | 200.46             | 23.51       | 0           |
| pre-mod(mdg4)-I | 1.12               | 18.67       | 2.22648E-06 |
| IM14            | 11.46              | 15.14       | 3.80132E-07 |
| IM4             | 26.43              | 14.97       | 1.74645E-12 |
| CG14569         | 1576.88            | 14.73       | 0           |
| IM2             | 7.26               | 14.47       | 2.01792E-06 |
| CG5791          | 1.79               | 13.80       | 2.90502E-05 |
| CG9121          | 3.41               | 11.54       | 0           |
| IM1             | 7.16               | 10.97       | 7.52122E-05 |
| CG11413         | 35.70              | 10.64       | 3.44242E-07 |
| CG16710         | 2.13               | 10.32       | 1.72352E-07 |
| CG31960         | 267.26             | 10.05       | 0           |
| CG16789         | 1.45               | 9.46        | 5.58576E-09 |
| CG6034          | 6.92               | 8.47        | 4.7943E-11  |
| Ace             | 2.06               | 8.19        | 0           |
| CG13059         | 9.90               | 7.58        | 1.33893E-06 |
| CG31809         | 8.64               | 7.39        | 0           |
| CG7203          | 9.41               | 7.21        | 8.66989E-09 |
| Vha14-2         | 2.51               | 7.05        | 2.31024E-07 |
| wb              | 7.35               | 6.69        | 0           |
| Drs             | 8166.47            | 6.64        | 0           |
| CG5778          | 3.20               | 6.61        | 0.000294835 |
| CG3457          | 2.69               | 6.34        | 2.38755E-06 |
| Lcp65Ad         | 9.93               | 5.79        | 2.58249E-08 |
| lectin-22C      | 29.06              | 5.67        | 6.88538E-06 |
| fuss            | 3.97               | 5.67        | 0           |
| CG43333         | 2.39               | 5.63        | 1.48392E-09 |
| CG18336         | 2.96               | 5.49        | 5.52167E-05 |

Niu et al.

JAK/STAT signaling in the larval trachea of *Drosophila*

|         |       |      |             |
|---------|-------|------|-------------|
| CG32563 | 3.06  | 5.35 | 0.000696584 |
| FASN2   | 1.65  | 5.34 | 2.95545E-10 |
| Cyp4d21 | 45.70 | 5.31 | 0           |
| Obp57d  | 1.80  | 5.28 | 0.000102926 |
| CG17560 | 2.31  | 5.22 | 0.000766701 |
| CG5888  | 68.16 | 5.20 | 0           |

822  $p < 1 \times 10^{-4}$ , fold change > 5, maximum group mean > 1. The list is restricted to 39 genes.

823

824 Table 2 Transcription factor-binding site motifs enriched in 41 highly upregulated genes.

| Matrix ID | Matrix name | P-value     |
|-----------|-------------|-------------|
| MA0023.1  | dl (var.2)  | 0.000443261 |
| MA0022.1  | dl          | 0.00407113  |
| MA0532.1  | STAT92E     | 0.00794732  |
| MA0450.1  | hkb         | 0.00811969  |
| MA0197.2  | nub         | 0.0154201   |
| MA0242.1  | Bgb::run    | 0.0371696   |
| MA0204.1  | Six4        | 0.0443521   |
| MA0444.1  | CG34031     | 0.0488169   |

825 A total of 133 transcription factor profiles were used.

826

827

828

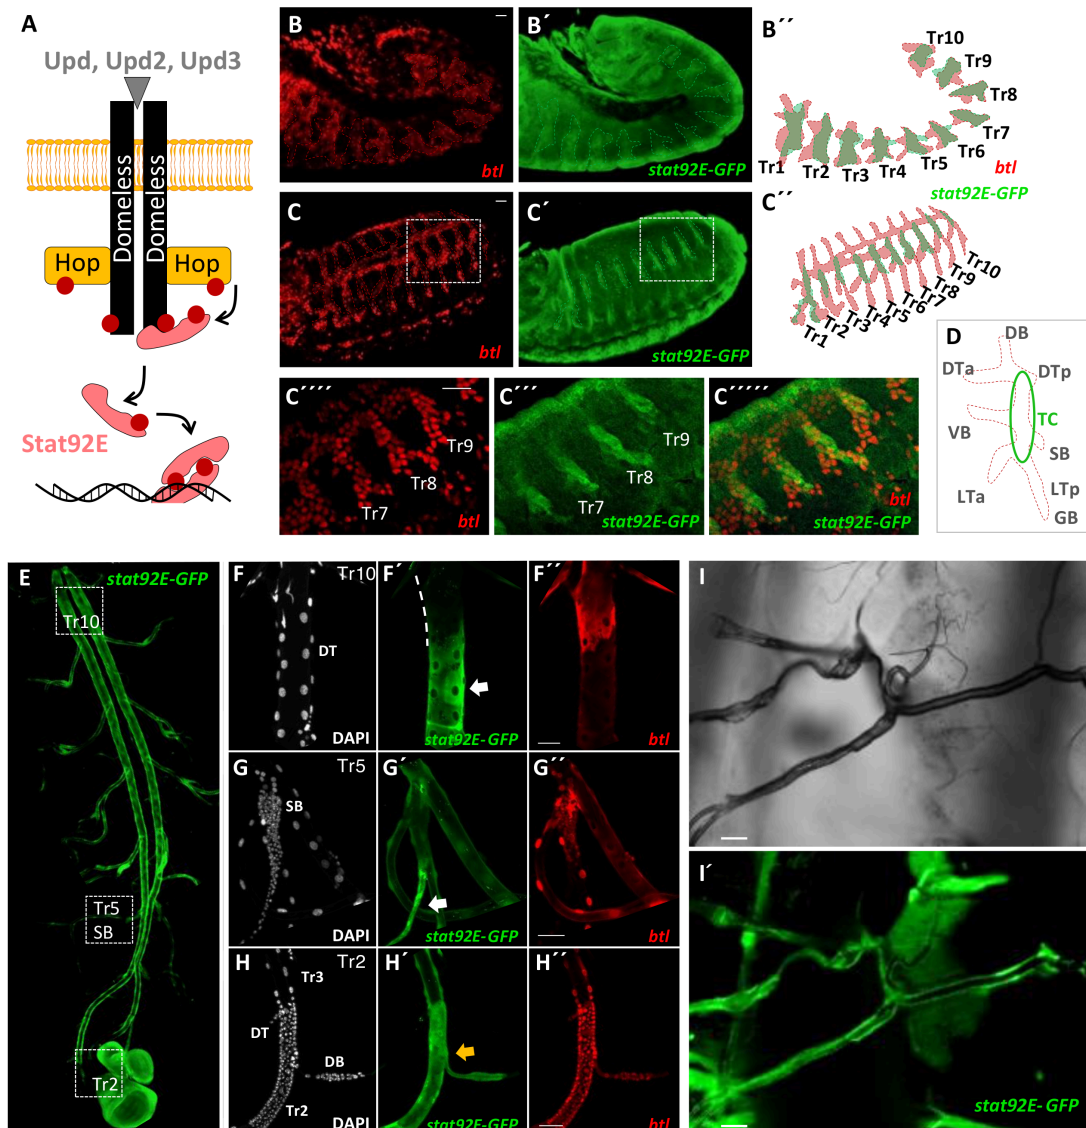

829

830 Figure 1: The activation of JAK/STAT signaling pathway in the respiratory system of *Drosophila*. (A)  
 831 shows a model of JAK/STAT signaling pathway in *Drosophila* comprising all major components. Three  
 832 ligands (Upd, Upd2 and Upd3) bind to a single receptor, Domeless (Dome), which transmits this  
 833 information via a single JAK (Hopscotch (Hop)) to a single STAT transcription factor (STAT92E). The  
 834 activation of JAK/STAT signaling through all developmental stages was detected by using a *STAT92E*-  
 835 *GFP* reporter (*btl-Gal4, STAT92E-GFP; UAS-LacZ.nls*). (B-D) Fluorescence micrographs of embryonic  
 836 trachea stained for GFP (green, JAK/STAT pathway activated zones), and beta-galactosidase (red,  
 837 tracheal metamere (Tr)), respectively. The activation of JAK/STAT pathway in the terminal regions is  
 838 weaker than that in the central regions before (B) and after the fuse of tracheal invaginations of all  
 839 segments (C). (D) shows the activation pattern of JAK/STAT signaling in the embryonic trachea  
 840 metamere. The stronger signal in the central region mainly belongs to TC (green circle). DB, dorsal



841 branch; DTa, dorsal trunk anterior; DTp, dorsal trunk posterior; VB, visceral branch; LTa, lateral trunk  
842 anterior; LTp, lateral trunk posterior; and GB, ganglionic branch; SB, spiracular branch; transverse  
843 connective, TC. The stronger signal in the central regions mainly belongs to TC. Scale bar: 20  $\mu\text{m}$ . (E-H)  
844 Fluorescence micrographs of larval trachea. JAK/STAT activity is present in most parts of the trachea  
845 (E). The region in the posterior region of the trachea (dorsal trunk (DT) of Tr10, white dash line in F)  
846 showed a decreased activity of JAK/STAT signaling compared to other tracheal epithelial cells. Scale  
847 bar: 50  $\mu\text{m}$ . Conversely, some regions like SB (G, marked by white arrow) and Tr2, DB (H, marked by  
848 white arrow) showed an increased activity of JAK/STAT signaling compared to the tracheal epithelial  
849 cells. Scale bar: 50  $\mu\text{m}$ . (I) Fluorescence micrographs of adult trachea. JAK/STAT signaling was induced  
850 in the trachea of the adult.

851

852

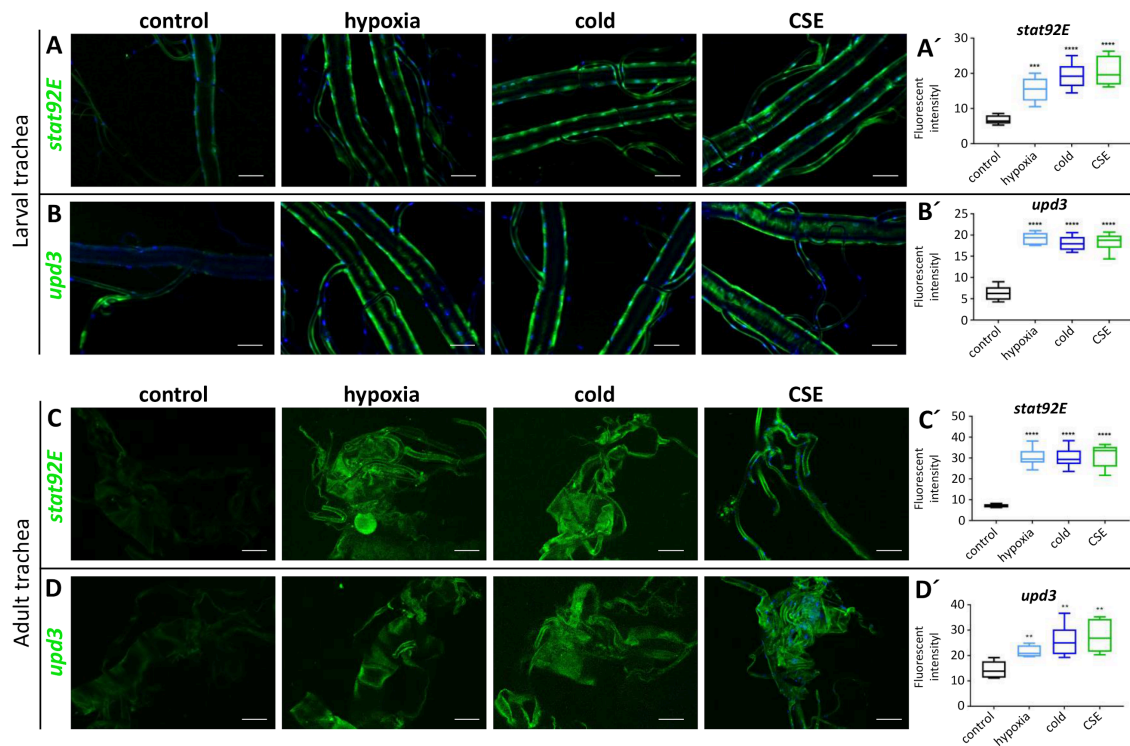

853

854 Figure 2: JAK/STAT signaling pathway in trachea was activated by external stimuli. (A and C)  
 855 Fluorescence micrographs of the trachea of *STAT92E-GFP* larvae (A) and adult (C) under normal  
 856 conditions and external stimuli, including hypoxia, cold air (cold), cigarette smoke exposure (CSE). The  
 857 external stimuli induced activity of STAT92E could be observed and was quantified through fluorescent  
 858 intensity (A' and C'). (B and D) Fluorescence micrographs of the trachea of *upd3-Gal4; UAS-GFP* larvae  
 859 (B) and adult (D) that were exposed to normal condition and external stimuli. The external stimuli  
 860 induced expression of *upd3* could be observed and was quantified through fluorescent intensity (B'  
 861 and D'). \*\*  $p < 0.01$ , \*\*\*  $p < 0.001$ , \*\*\*\*  $p < 0.0001$  by Student's t-test. Scale bar: 100  $\mu$ m.

862

863

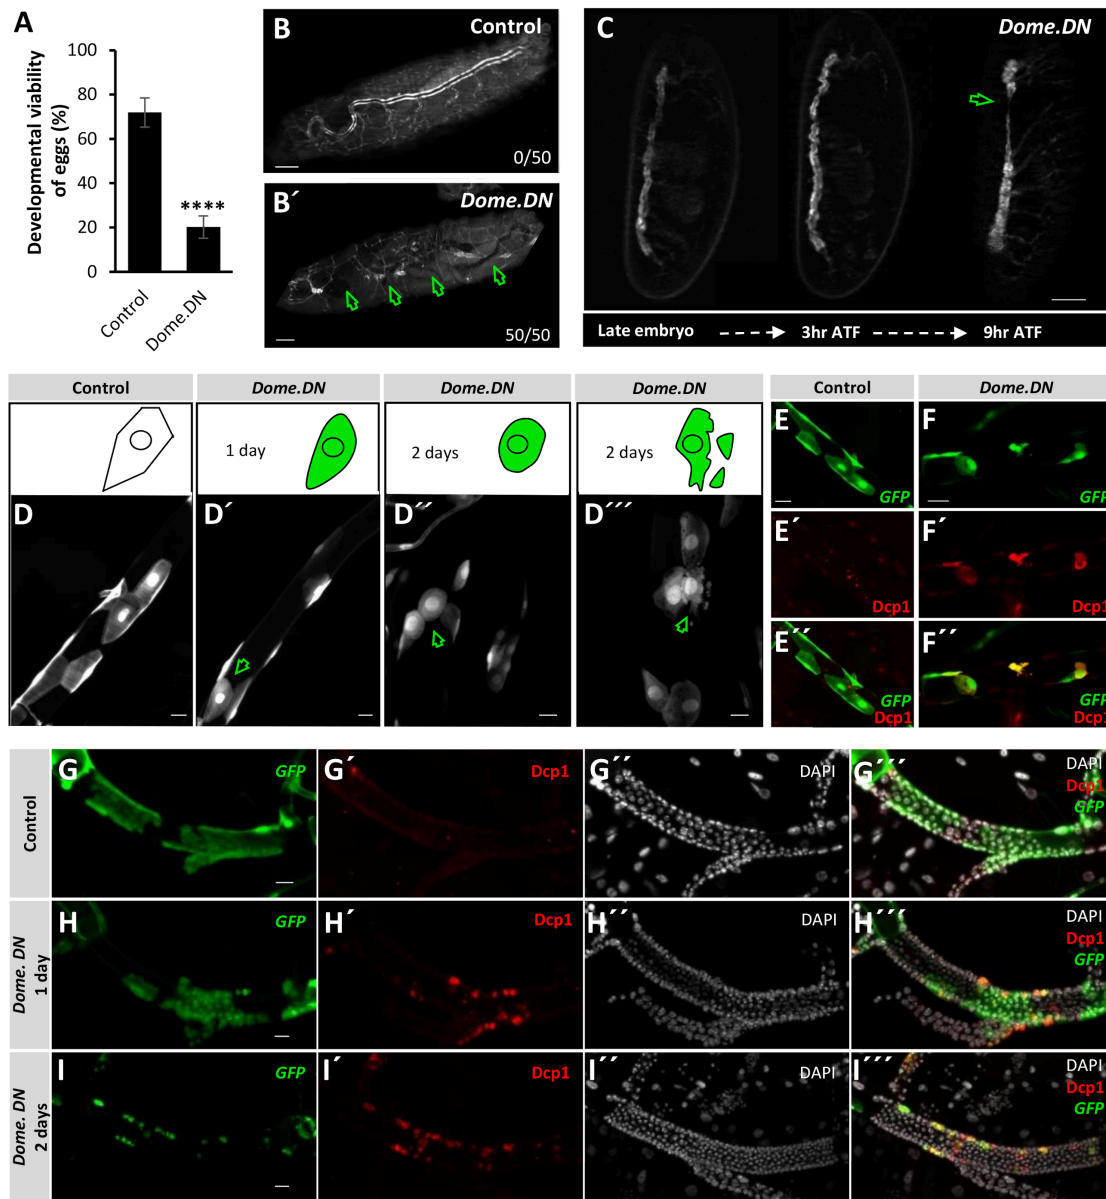

864

865 Figure 3: Inhibition of JAK/STAT signaling pathway induced epithelial cell apoptosis. (A) Ectopic blocking  
 866 of JAK/STAT signaling in the trachea was done by expressing *Dome.DN* under the control of *btl-Gal4*.  
 867 The developmental viability is shown by the percentage of embryos that hatched. (\*\*\*\*  $p < 0.0001$  by  
 868 Student's t-test). (B) Micrographs of surviving larvae. Scale bar: 50  $\mu$ m. *Dome.DN* expression inhibited  
 869 the formation of an intact tracheal tree. X/XX: emerged phenotype/total animals. (C) Time-lapse  
 870 imaging of the trachea of *btl-Gal4>Dome.DN* embryos continuously for 9 hours after tracheal  
 871 formation (9hr ATF). Scale bar: 50  $\mu$ m. (D-I) Fluorescence micrographs of *Dome.DN* expressing mosaic  
 872 mutant clones (GFP, green) in the larval trachea (*vv1-FLP, CoinFLP-Gal4, UAS-EGFP; tub-Gal80[ts] (vv1-*  
 873 *coin.ts)>Dome.DN*). (D) Negative regulation of JAK/STAT pathway by expressing *Dome.DN* in the trachea  
 874 led to changes in cell morphology (D' and D'') and disintegration afterwards (D''', green arrows, Scale

Niu et al.

JAK/STAT signaling in the larval trachea of *Drosophila*

875 bar: 20  $\mu\text{m}$ ). (E-F) Fluorescence micrographs of the tracheal somatic cells of *vvl-coin.ts* larvae (E), and  
876 the tracheal somatic cells of *vvl-coin.ts>Dome.DN* larvae (F) stained for cleaved Dcp1 (red, on day 2  
877 after induction). Scale bar: 50  $\mu\text{m}$ . (G-I) The progenitor cells of Tr2 could be stained by cleaved Dcp1  
878 earlier than the mutant somatic cells (red, on day 1 after induction). Scale bar: 50  $\mu\text{m}$ . Nuclei are  
879 stained with DAPI.

880

881

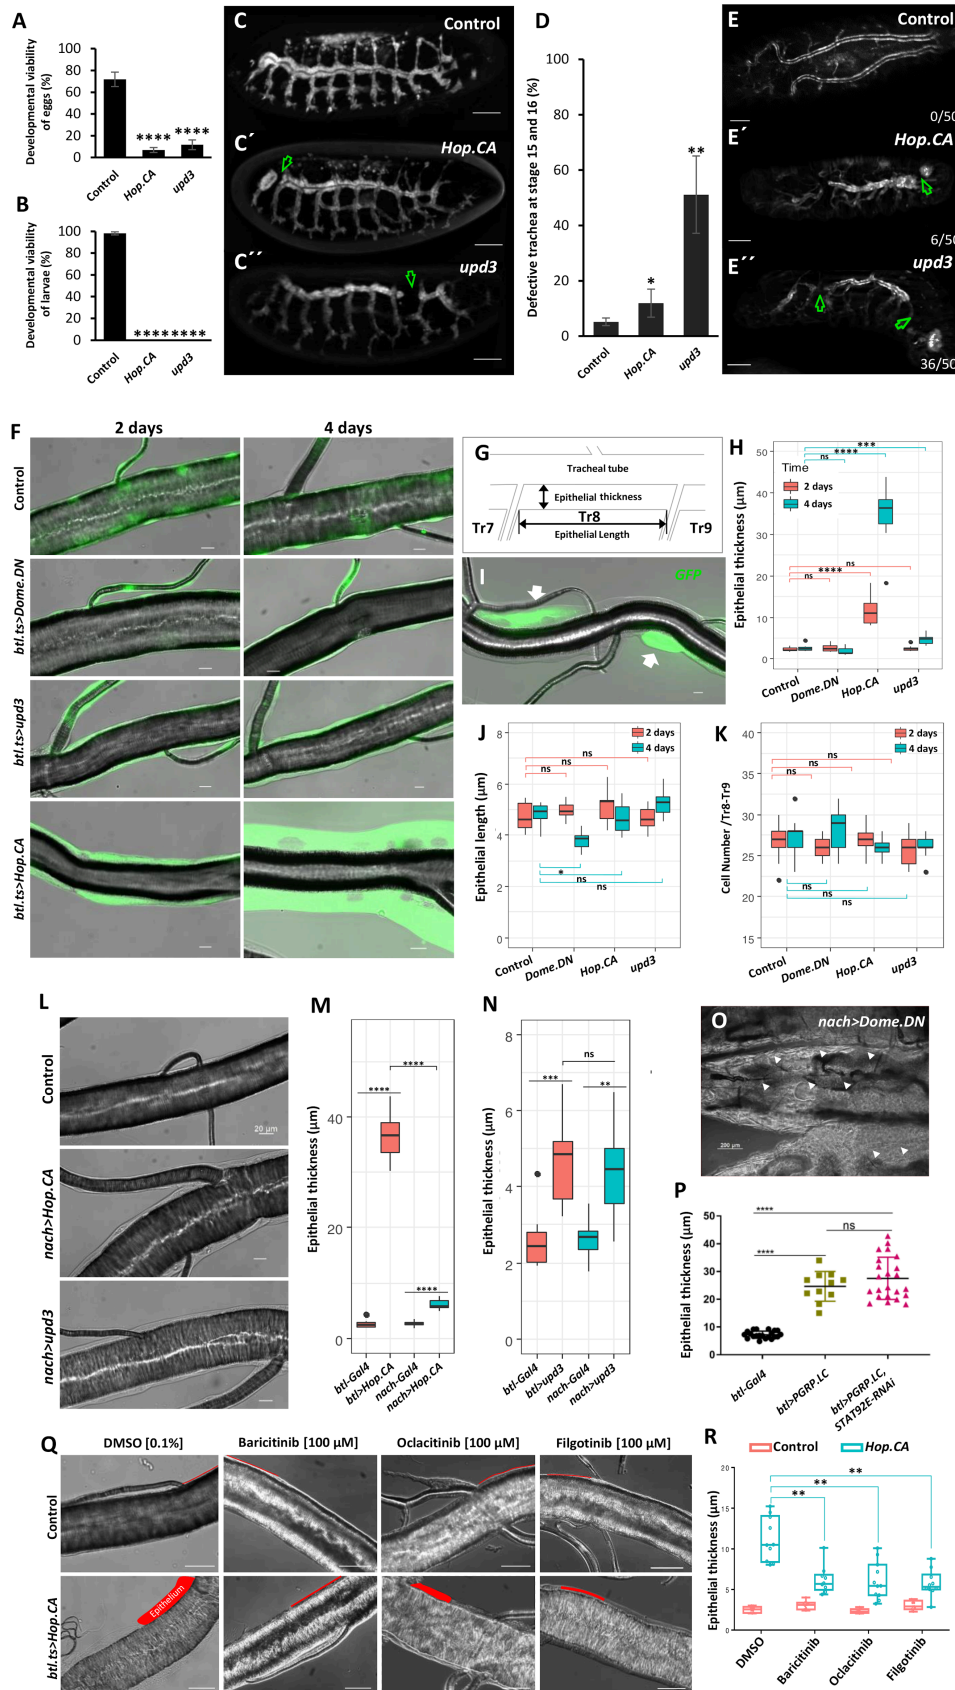

883 Figure 4: Ectopic activation of JAK/STAT signaling in the trachea induced cell thickening. Ectopic  
884 regulation of JAK/STAT signaling in the trachea was performed by expressing *Hop.CA* or *upd3*  
885 activation and *Dome.DN* for inhibition of the pathway, under the control of *btl-Gal4*. The percentage  
886 of embryos that hatched (A) and the percentage of larvae that developed into pupa (B) are shown. (C)  
887 Fluorescence micrographs of *btl>Hop.CA* (or *btl>upd3*) embryos. Scale bar: 50  $\mu$ m. (D-E) Activation of  
888 the JAK/STAT pathway in the trachea led to uncompleted tracheal development during tracheal  
889 morphogenesis. (D) Quantification of the numbers of defect trachea in *btl>Hop.CA* or *btl>upd3*  
890 embryos. (E) Micrographs of the trachea of the surviving larvae. Scale bar: 50  $\mu$ m. (F) Ectopic activation  
891 of epithelial JAK/STAT signaling (*Hop.CA* or *upd3*) or inactivation (*Dome.DN*) under control of *btl.ts-Gal4*  
892 (dorsal trunk of Tr8 of L3 larvae). Larvae were raised at 29 °C for 2 or 4 days for induction, respectively.  
893 Scale bar: 20  $\mu$ m. (G) Illustration of epithelial thickness, epithelial length. (H) Statistical analysis of the  
894 epithelial thicknesses in DT8 of the corresponding larvae. (I) Micrographs of DT8 of *vvl-FLP, CoinFLP-*  
895 *Gal4, UAS-EGFP (vvl-coin)>Hop.CA* larvae. Scale bar: 20  $\mu$ m. The thickening of the tracheal epithelium  
896 is observed in those cells that express *Hop.CA* (arrows). (J-K) Quantification of epithelial length and the  
897 cell number of the DT8 region of larvae with different types of ectopic manipulation (including  
898 *Dome.DN, Hop.CA* and *upd3* expression in the trachea driven by *btl-Gal4, tubPGal80ts*) for 2 or 4 days,  
899 respectively. Mild activation of epithelial JAK/STAT signaling mitigated the thickening phenotype. (L)  
900 Micrographs of the DT8 regions of *nach-Gal4* larvae, *nach>Hop.CA* larvae and *nach>upd3* larvae. Scale  
901 bar: 20  $\mu$ m. (M-N) Quantification of the epithelial thickness of the DT8 region of those larvae whose  
902 JAK/STAT signaling were activated by expressing *Hop.CA* or *upd3* under the control of *nach-Gal4* and  
903 *btl-Gal4*. (O) Micrographs of *nach>Dome.DN* larvae experiencing suppression of the JAK/STAT pathway  
904 make trachea translucent and filled with fluids. Triangle indicates the tracheal position. Scale bar: 200  
905  $\mu$ m. (P) Quantification of the epithelial thickness of the DT8 region of *btl-Gal4* larvae, *btl>PGRP.LC*  
906 larvae and *btl>PGRP.LC, STAT92E-RNAi* larvae. *TubPGal80ts* was used to inhibit the expression of *UAS-*  
907 *PGRP.LC* and *UAS-STAT92E<sup>RNAi</sup>* before animal become L3 larvae and activated *UAS-* genes expression for  
908 one day. Changes in epithelial thickness could be rescued by application of specific JAK inhibitors (Q  
909 and R). (Q) Microscopy of the tracheal epithelium (L3 larvae). Control crossings *btl-Gal4,*  
910 *tubPGal80ts>w<sup>1118</sup>* compared to JAK/STAT activated crossings *btl-Gal4, tubPGal80ts>Hop.CA*. Scale bar:  
911 50  $\mu$ m. (R) Quantification of epithelial thickness (highlighted in red) of the JAK inhibitors (Baricitinib,  
912 Oclacitinib, Filgotinib) compared to DMSO control. Green arrow: the defective region, ns means no  
913 significant, \*  $p < 0.05$ , \*\*  $p < 0.01$ , \*\*\*  $p < 0.001$ , \*\*\*\*  $p < 0.0001$  by Student's t-test.

914

915

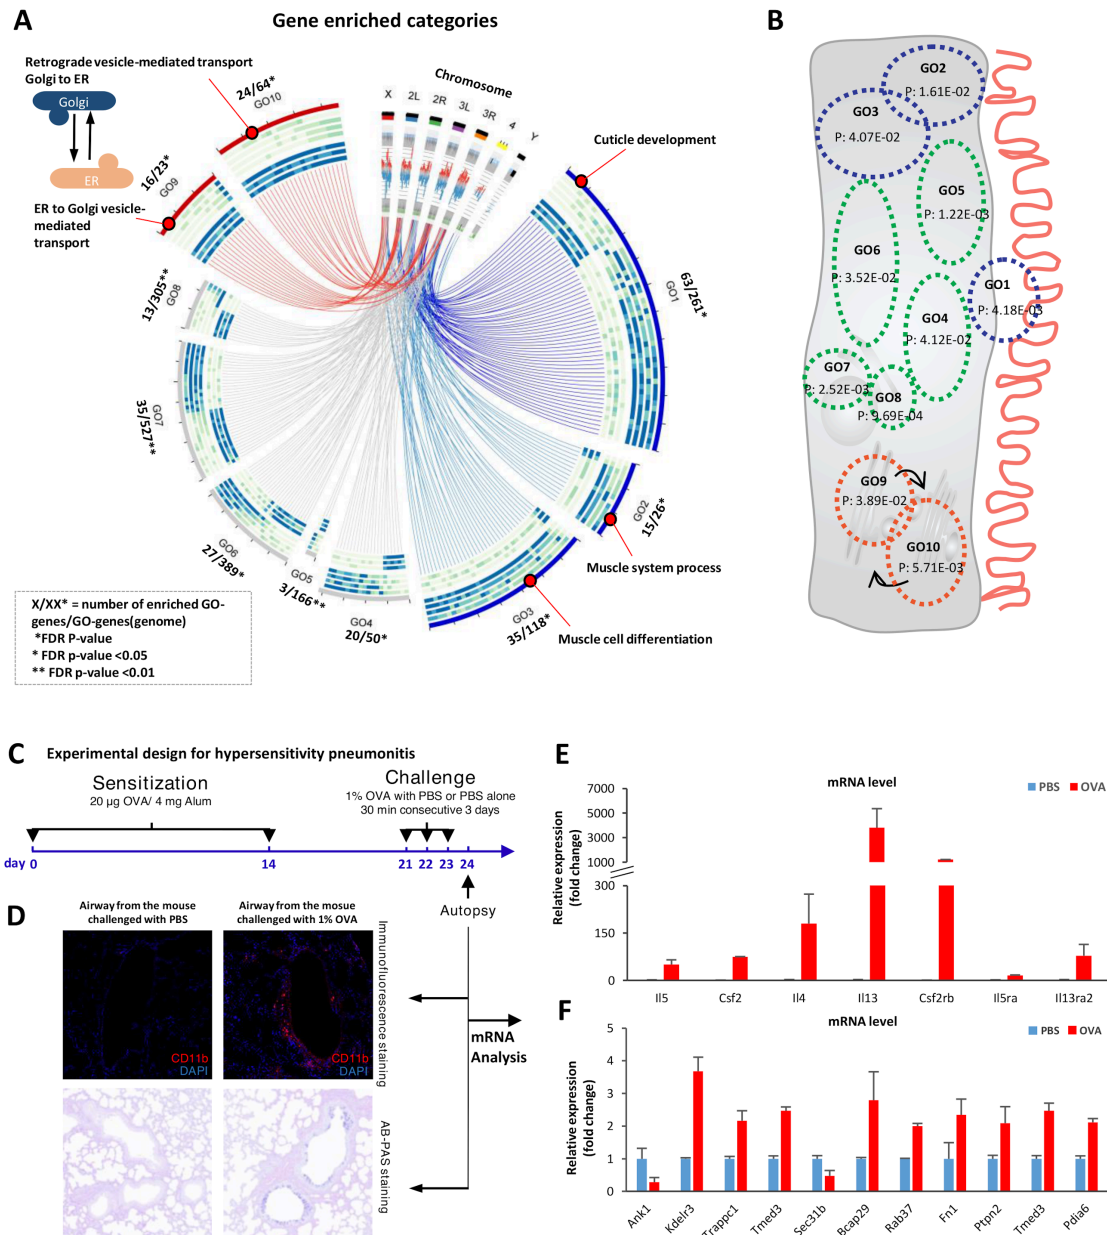

916

917 Figure 5: Gene Ontology (GO) enrichment analysis of the 2004 annotated differentially expressed genes  
 918 in *Hop.CA* overexpressing airways vs. controls. (A) Gene ontology analysis showed 10 biological  
 919 processes that were enriched in *Hop.CA* overexpressing airways compared with matching controls.  
 920 Most regulated genes in the GO1, GO2, and GO3 were downregulated. Most regulated genes that  
 921 involved in the COPI- and COPII-mediated vesicular transport between endoplasmic reticulum and  
 922 Golgi (GO9 and GO10) were up-regulated. GO1, cuticle development; GO2, muscle system process;  
 923 GO3, muscle cell differentiation; GO4, glutathione metabolic process; GO5, detection of chemical  
 924 stimulus; GO6, cellular protein-containing complex assembly; GO7, RNA processing; GO8, translation;  
 925 GO9, endoplasmic reticulum to Golgi vesicle-mediated transport; GO10, retrograde vesicle-mediated

926 transport Golgi to the endoplasmic reticulum. (B) Enriched biological processes were superimposed on  
927 a sketch depicting a tracheal epithelial cell, with the corresponding *p*-value added. Blue indicates  
928 processes where genes were mainly down-regulated; red indicates processes where genes were mainly  
929 up-regulated; green indicates processes where genes were both down-regulated and up-regulated to  
930 similar extents. (C) Experimental design for the OVA induced asthma model. Mice were sensitized with  
931 intraperitoneal injections of 20 µg of OVA emulsified in aluminum hydroxide in a total volume of 1 ml  
932 on days 7 and 14, followed by 3 consecutive challenges each day by exposure to OVA or PBS aerosol  
933 for 30 min. Mice were sacrificed 24 h following the final challenge. The left lungs were collected for  
934 histological analysis and the superior lobes were dissected for RNA analysis. (D) The lungs were stained  
935 with CD11b antibody and with the standard Alcian blue (AB) method followed by the Periodic acid–  
936 Schiff (PAS) technique. (E) Important chemokines and chemokine receptors induced by OVA aerosol  
937 are involved in JAK/STAT signaling pathway. (F) The genes that function in the process of ER to Golgi  
938 vesicle-mediated transport are mostly upregulated when the mice were exposed to OVA aerosol.

939

940



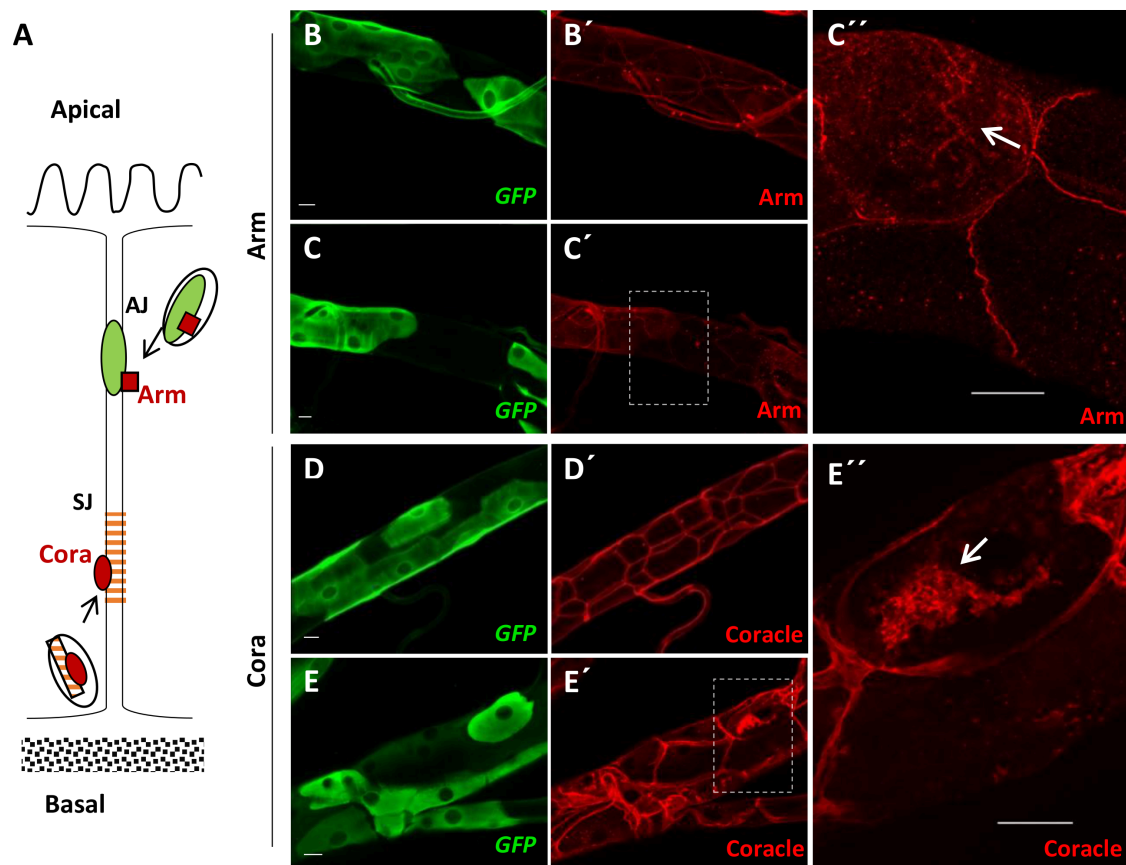

941

942 Figure 6: Activation of airway epithelial JAK/STAT signaling affects vesicle-mediated transport of  
943 proteins. (A) Schematic orientation of Arm and Cora at the contact zone between two airway epithelial  
944 cells. Adherens junction (AJ), septate junction (SJ). Trachea of *vvl-coin* larvae (control; B and D) and *vvl-*  
945 *coin>Hop.CA* larvae (treatment; C and E) stained for GFP (green, Gal4 positive cells), Arm or Cora (red),  
946 respectively. 30 specimens were investigated in each group. Scale bar: 20  $\mu$ m.

947

948

949

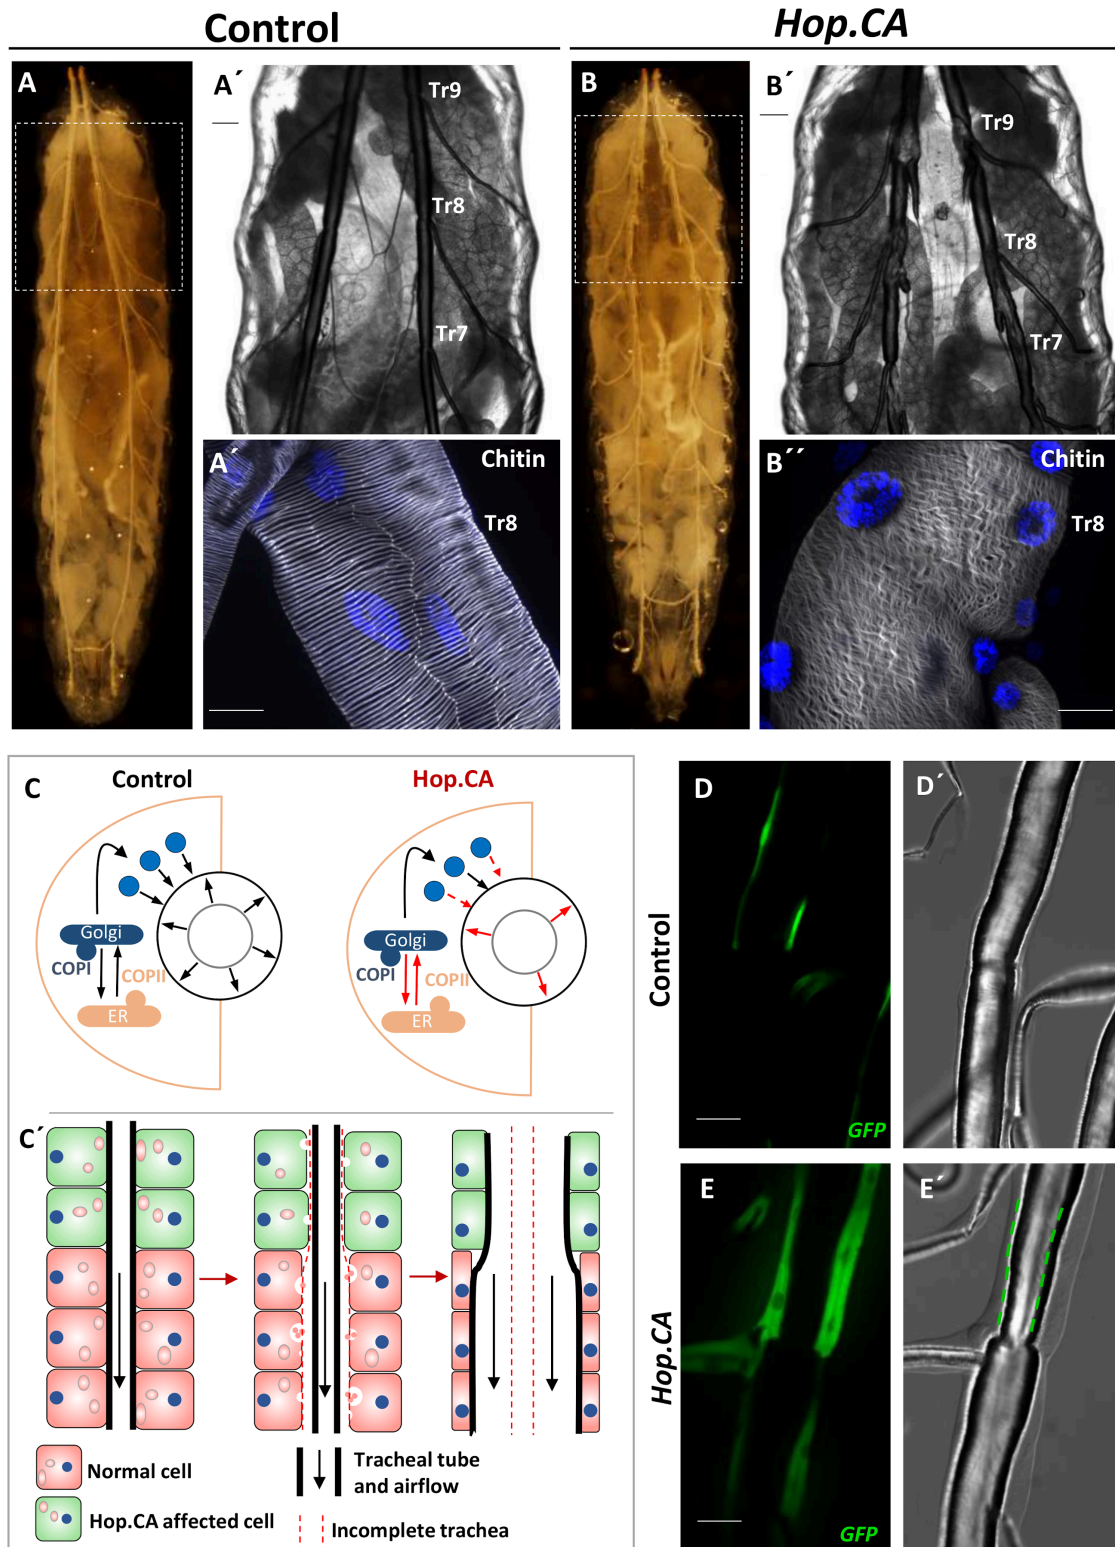

951 Figure 7: Activation of JAK/STAT signaling in airway epithelial cells affects the development of the  
952 epicuticle. (A-B) Activation of JAK/STAT signaling in airway epithelia observed in whole larvae by  
953 expressing *UAS-Hop.CA* under the control of the *btl.ts* (B-B'') compared to the control (A-A''). In (A'  
954 and B') the region containing Tr7-Tr9 is shown. (A'' and B'') Chitin staining of isolated airways (at the  
955 Tr8 region). Scale bar: 50  $\mu$ m. (C) Schematic illustration of a potential explanation for the thickening of  
956 the epithelium and narrowing of the tube. In the control epithelium, a secretory burst of luminal  
957 proteins drives the diametric expansion of the tubes, and this process depends on vesicle-mediated  
958 transport. COPI-and COPII-mediated vesicular transport plays a central role in this process, mutation  
959 members in the process underly the tube size defect in previous reports (Jayaram et al., 2008;  
960 Tsarouhas et al., 2007). Although active JAK induced the expression of the genes involved in the vesicle-  
961 mediated transport, long-term activation eventually impedes the transport of vesicles out of the cell  
962 (C). This dysfunction of transport could lead to the appearance of tube size defects such as the increase  
963 in the cell volume and narrowing of the tube size (C') (Jayaram et al., 2008; Tsarouhas et al., 2007). (D-  
964 E) Micrographs of the trachea of *vvl-coin* larvae (control; D) and *vvl-coin>Hop.CA* larvae (treatment; E).  
965 Cells with *vvl-Gal* expression are stained with GFP (D-E). The green dash line in the E' show stenosis in  
966 the regions with cells expressing *Hop.CA* to a high degree. Scale bar: 50  $\mu$ m.

967

968
