# Supplementary material for: Maintaining structural and functional homeostasis of the Drosophila respiratory epithelia requires stress-modulated JAK/STAT activity
Source: bioRxiv or medRxiv preprint supplement (doi:10.1101/2020.06.19.160929), 2022-11-25
Supplement: Supplementary file [file media-1.pdf]

Supplementary materials for Niu et al.

Supplementary figures

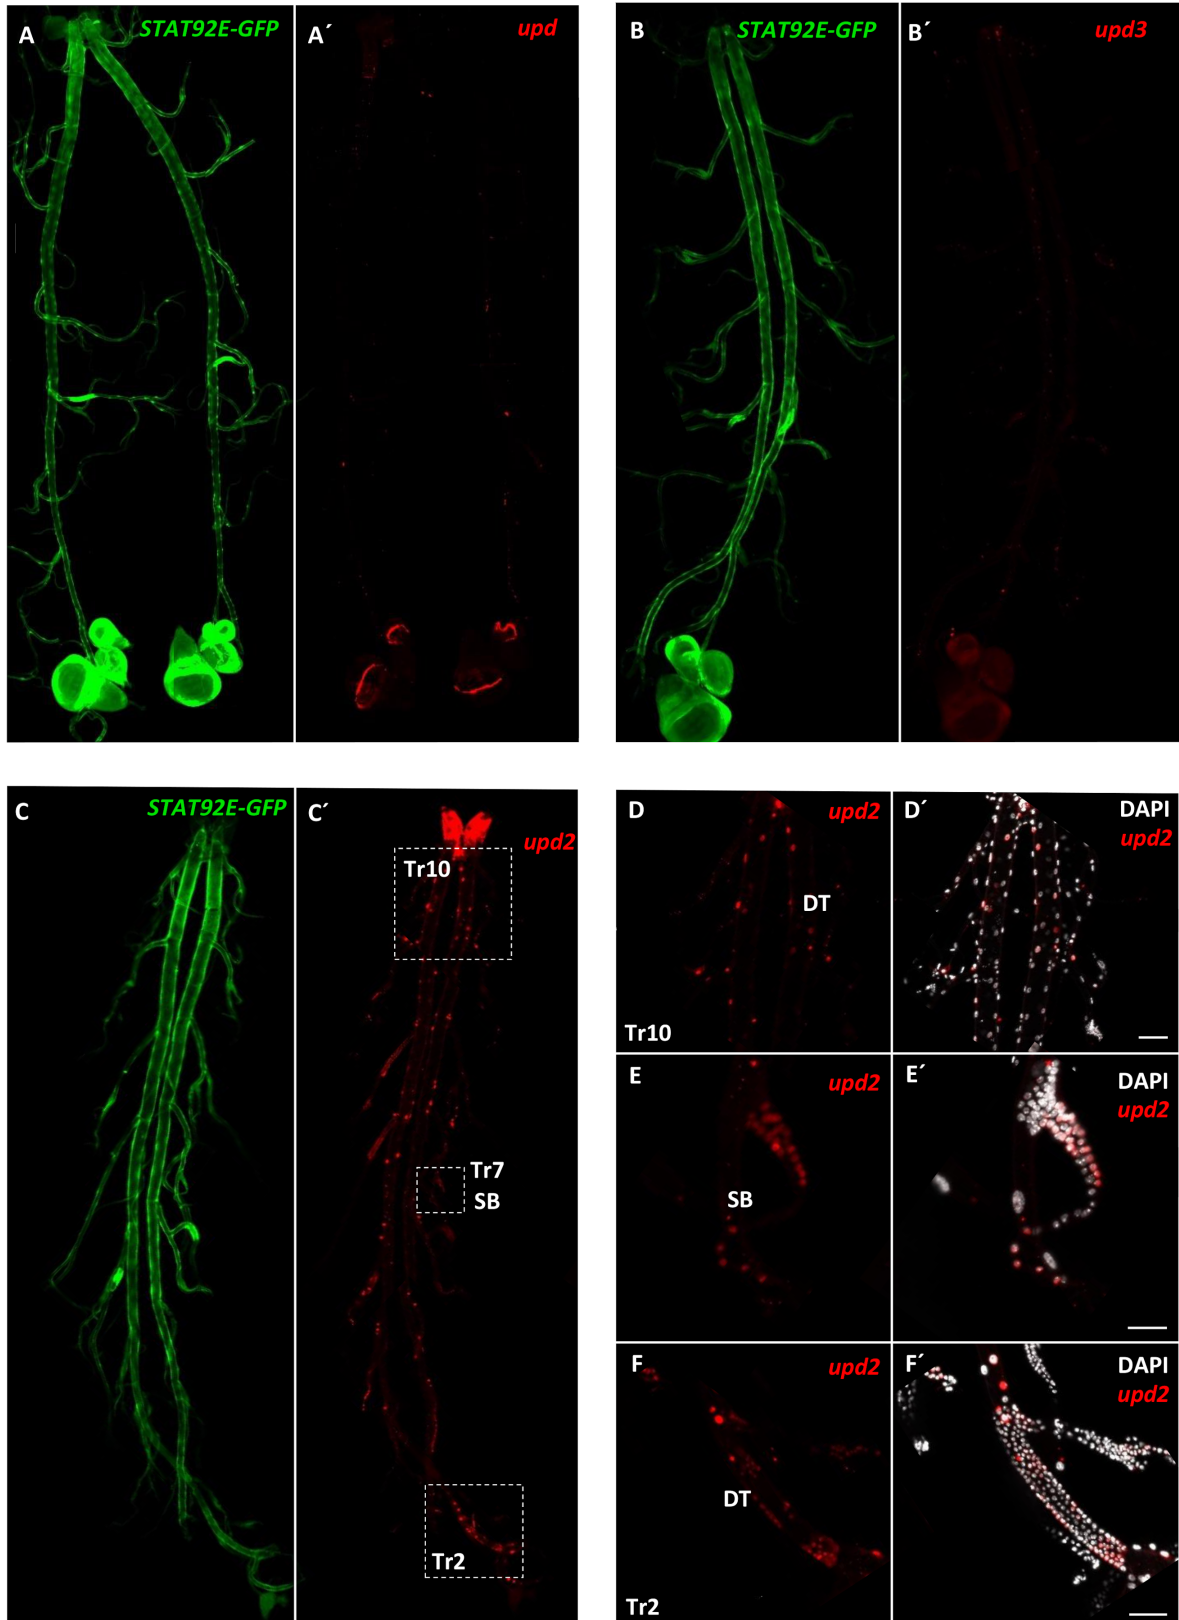

Figure S1 JAK/STAT signaling is activated in the larval trachea. (A-C) Fluorescence micrographs of the trachea of ligands (*upd*, *upd2* or *upd3*)-*Gal4*, *UAS-LacZ.nls*; *STAT92E-GFP* larvae stained to show ligand expressing cells (anti- $\beta$ -galactosidase, red) and JAK/STAT signaling activated cells (anti-GFP, green). *Upd2* displayed a higher transcript level in the trachea compared to *upd* (showed a strong expression in the other tissue, like an imaginal disc) and *upd3* (which expression in the trachea could be induced by CS (Fig. 5 and (Prange et al., 2018))). (D-F) Fluorescence micrographs of Tr2 DT, Tr7 SB and Tr10 DT of *upd2-Gal4*, *UAS-LacZ.nls*; *STAT92E-GFP* larvae. In the dividing active regions such as Tr2 DT and Tr7 SB there is stronger JAK/STAT activity and a high intensity of *upd2* positive cells (E-F) compared to their adjoining somatic cells (D). Nuclei are stained with DAPI. Scale bar: 50  $\mu$ m.

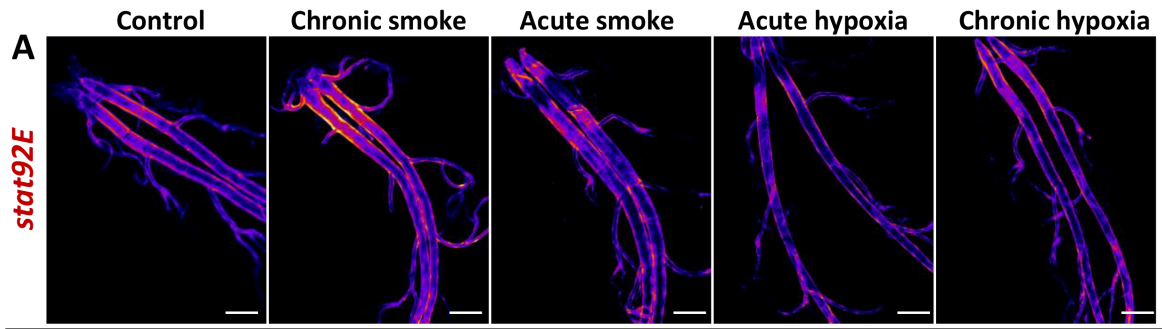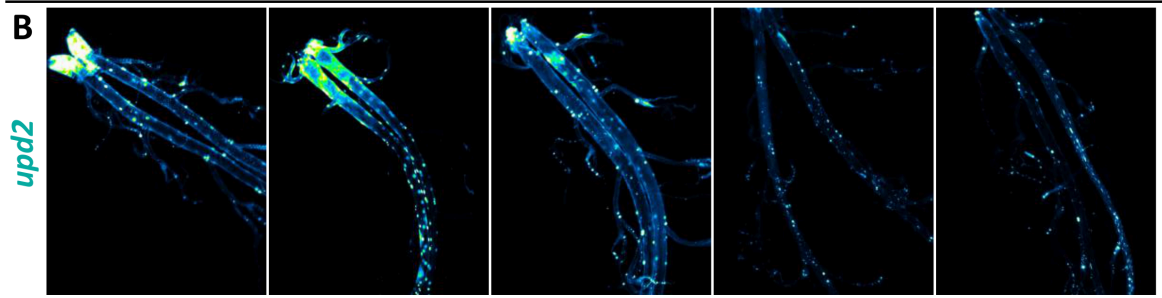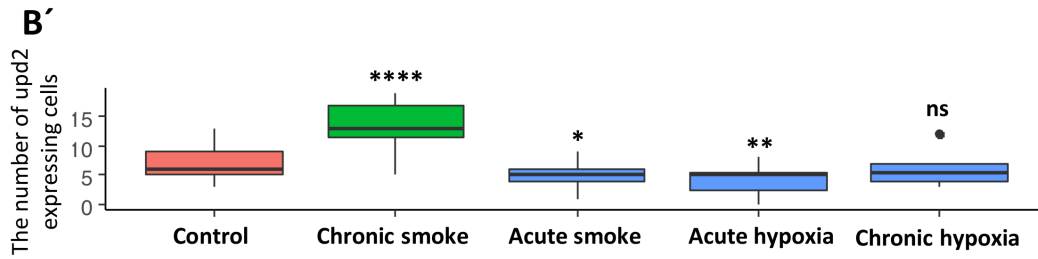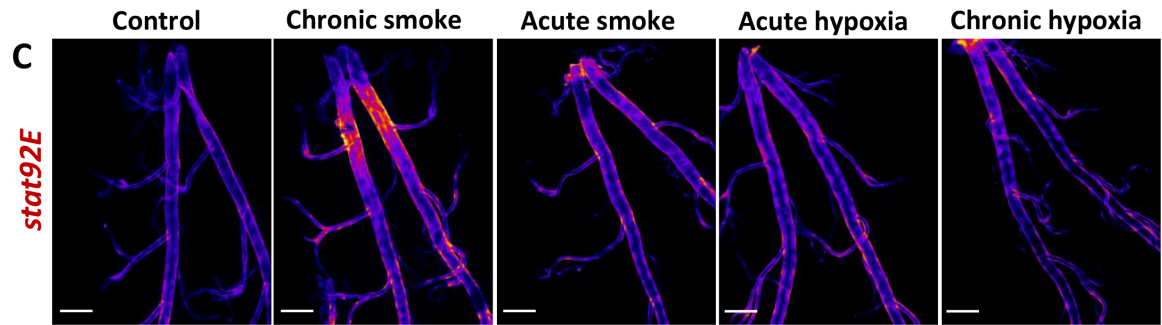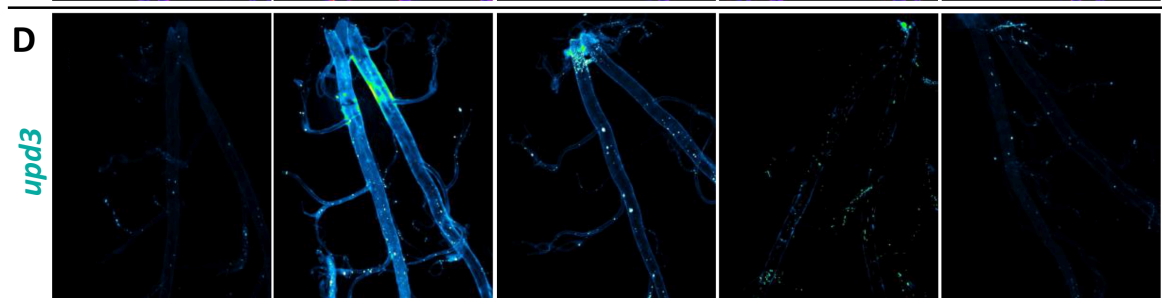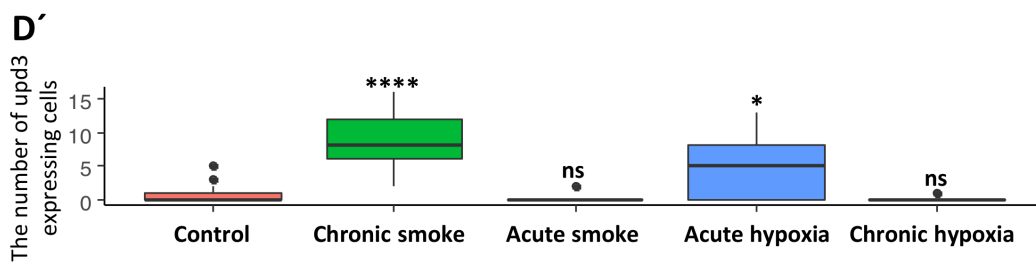

Figure S2 The activity of JAK/STAT pathway and the expression of its ligands *upd2* or *upd3* were observed in the trachea of larvae that were exposed to smoke and hypoxia. Fluorescence micrographs of the trachea of *upd2-Gal4* (A-B) or *upd3-Gal4* (C-D); *STAT92E-GFP*; *UAS-LacZ.nls* larvae that were exposed for 2 days smoke (chronic smoke), heavy smoke (acute smoke), strong hypoxia (acute hypoxia), and 2 days hypoxia (chronic hypoxia). Trachea were stained for GFP (A and C; red, JAK/STAT pathway activated zones) and Beta-galactosidase (green, cells that expressed *upd2* or *upd3*), respectively. The numbers of cells that expressed *upd2* (B') or *upd3* (D') were counted under these different conditions. ns means not significant, \*  $p < 0.05$ , \*\*  $p < 0.01$ , \*\*\*\*  $p < 0.0001$  by Student's t-test. Scale bar: 200  $\mu\text{m}$ .

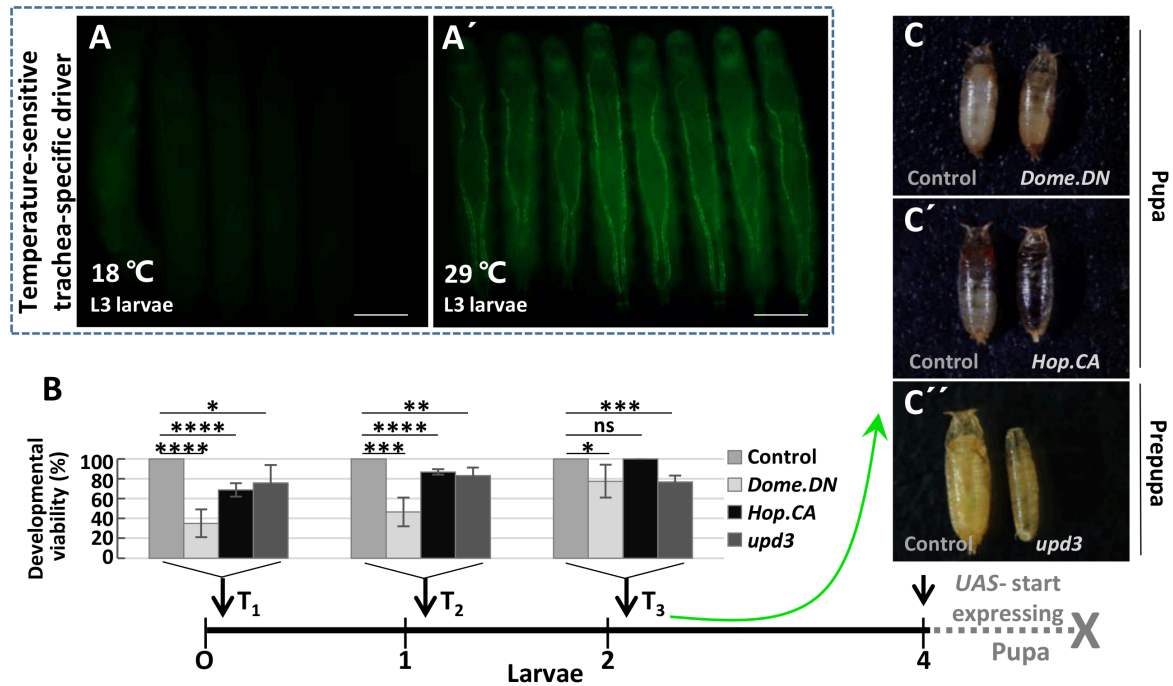

Figure S3 The temperature sensitive tracheal-specific driver line and the developmental viability analysis of larvae with abnormal JAK/STAT signaling. (A) *btl-Gal4*, *UAS-GFP*; *tub-Gal80[ts]* (*btl.ts*) larvae were raised at 18 °C (nonpermissive, A) and 29 °C (permissive, A'), respectively. Using the Gal4/UAS system, comprising the temperature-sensitive repressor Gal80[ts], were used to time ectopic gene expression. (B) Developmental viability of larvae with different genotypes (including *Dome.DN*, *Hop.CA*, and *upd3* expression in the trachea driven by *btl.ts*) and different start points of expression (indicated by black arrows). (C) None of these manipulations allowed survival up to adults shown by pictures of the non-closed pupae. ns means not significant, \*  $p < 0.05$ , \*\*  $p < 0.01$ , \*\*\*  $p < 0.001$ , \*\*\*\*  $p < 0.0001$  by Student's t-test.



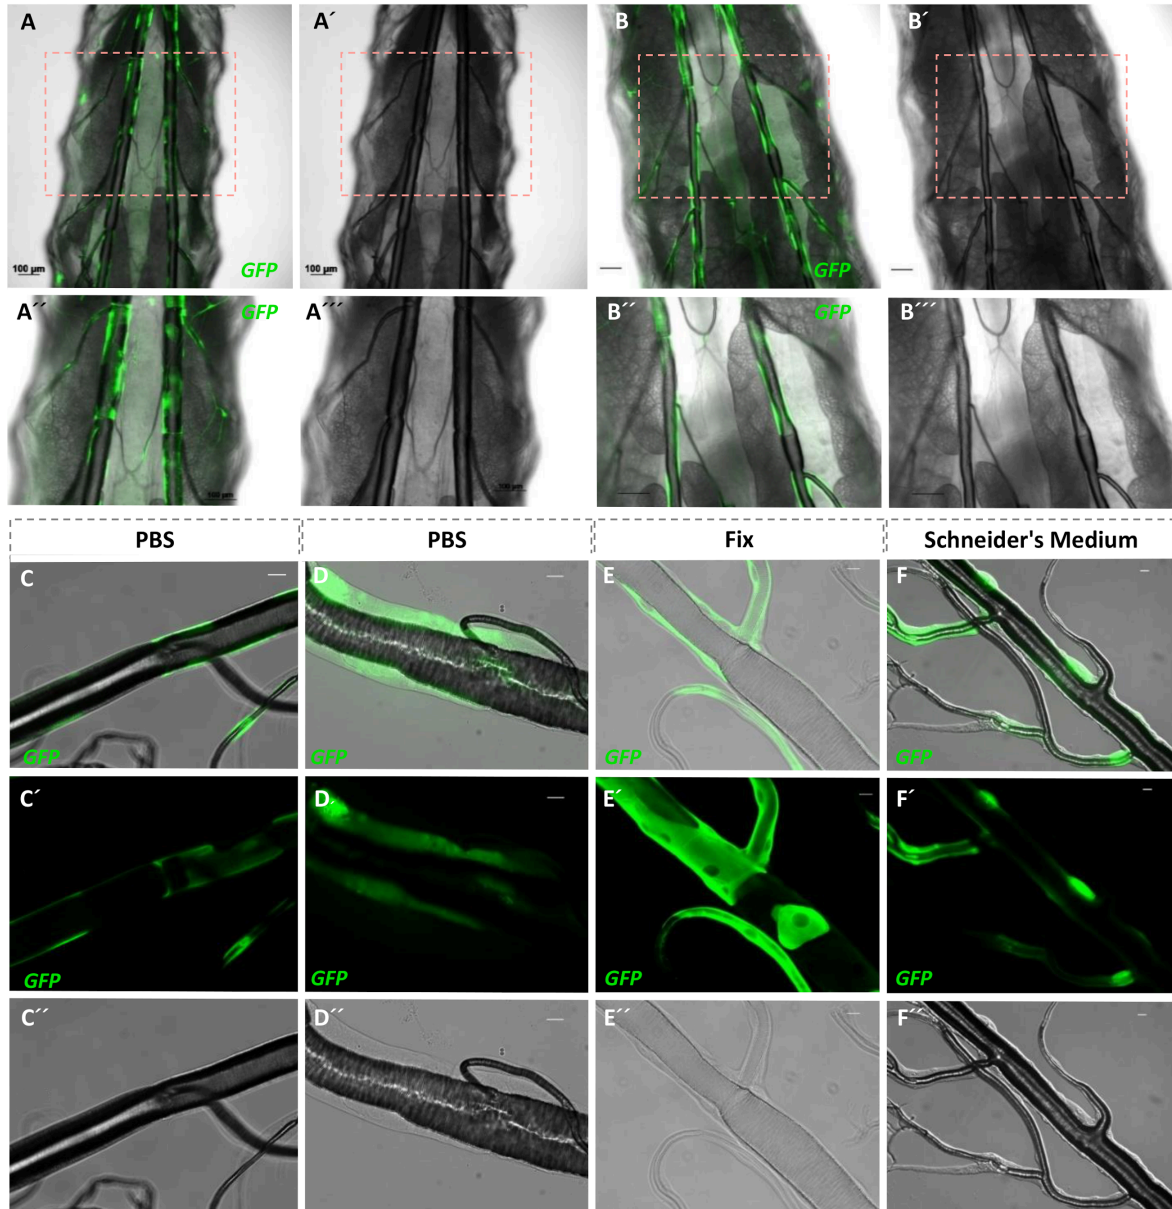

Figure S4: Validation that the increase in cell volume is not an artefact. (A-B) Micrographs of the posterior of *vvl-coin* larvae (A) and *vvl-coin>Hop.CA* larvae (B). Microscopy of the trachea in vivo displayed a thicker epithelium in affected clones (green) compared to the neighboring cells (B). The corresponding cells were not thicker in the control trachea (A). (C-F) Trachea of *vvl-coin* larvae (C) *vvl-coin>Hop.CA* larvae (D-F) were transferred to PBS (D) or Schneider's medium (F) or fixed immediately in 4% paraformaldehyde (E). All of them showed a significant increase in cell volume. Scale bar: 100  $\mu\text{m}$  in A-B; 20  $\mu\text{m}$  in C-F. 50 specimens are used in each experiment.

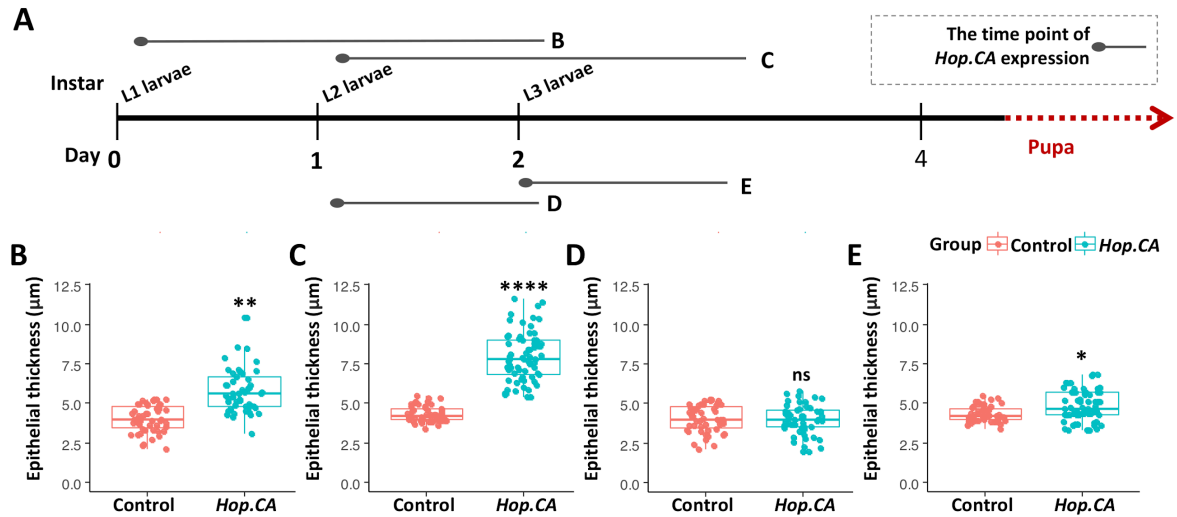

Figure S5 Time point and period of activation of *Hop.CA* expression by using the *btl.ts* driver. (A) Illustration of differing start and end points of *Hop.CA* expression by exposing them to the permissive temperature for one or two days in different larval stages. (B-E) Quantification of epithelial thickness of the DT8 region of control larvae (*btl.ts* driver line) and those experiencing ectopic manipulation (*btl.ts>Hop.CA* line). Each group contains 50 replicates in D-E. ns means not significant, \*  $p < 0.05$ , \*\*  $p < 0.01$ , \*\*\*\*  $p < 0.0001$  by Student's t-test.

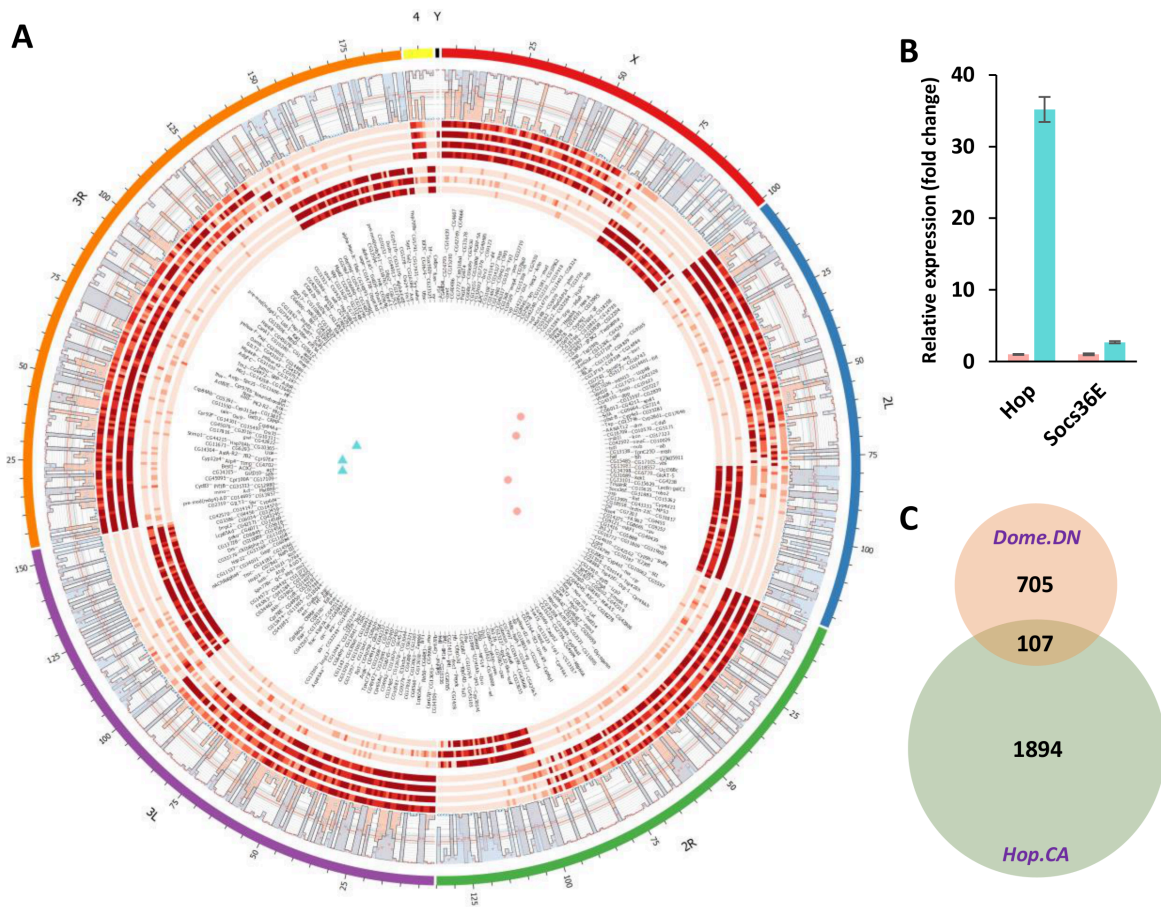

Figure S6: Changes at the transcript level in the airway epithelium of JAK/STAT mutants. Altered gene expression levels in the trachea caused by 16 hours persistent expression of *Hop.CA* driven by *btl.ts*. In total, 2004 genes were regulated significantly ( $p < 0.05$ ), in which 1128 genes were down-regulated, 876 genes were up-regulated. (A) 707 genes (fold change  $> 2$ ,  $p < 0.01$ ) were used to visualize the differences of the transcript levels between *Hop.CA* expressed trachea and control trachea. From the outside to the inside, a histogram for expression mean values (red, control; blue, *Hop.CA*), a heatmap for controls, a heatmap for *Hop.CA* overexpression, gene names, and PCA analysis, are shown. According to transcriptome analysis of the tracheal epithelium 1128 genes ( $p < 0.05$ ) were down-regulated, 876 genes ( $p < 0.05$ ) were up-regulated. The changes in the gene expression total value were not significant in the ectopic expression trachea compared to the controls. (B) Relative expression levels of *Hop* and *Socs36E* in *Hop.CA* trachea compared to control trachea. (C) The inhibition of the JAK/STAT signaling by ectopically expressing *Dome.DN* for 18 hours affects the transcription of 812 genes, however, which only 102 genes were regulated in both types of airways; with ectopically activated and inhibited JAK/STAT signaling.

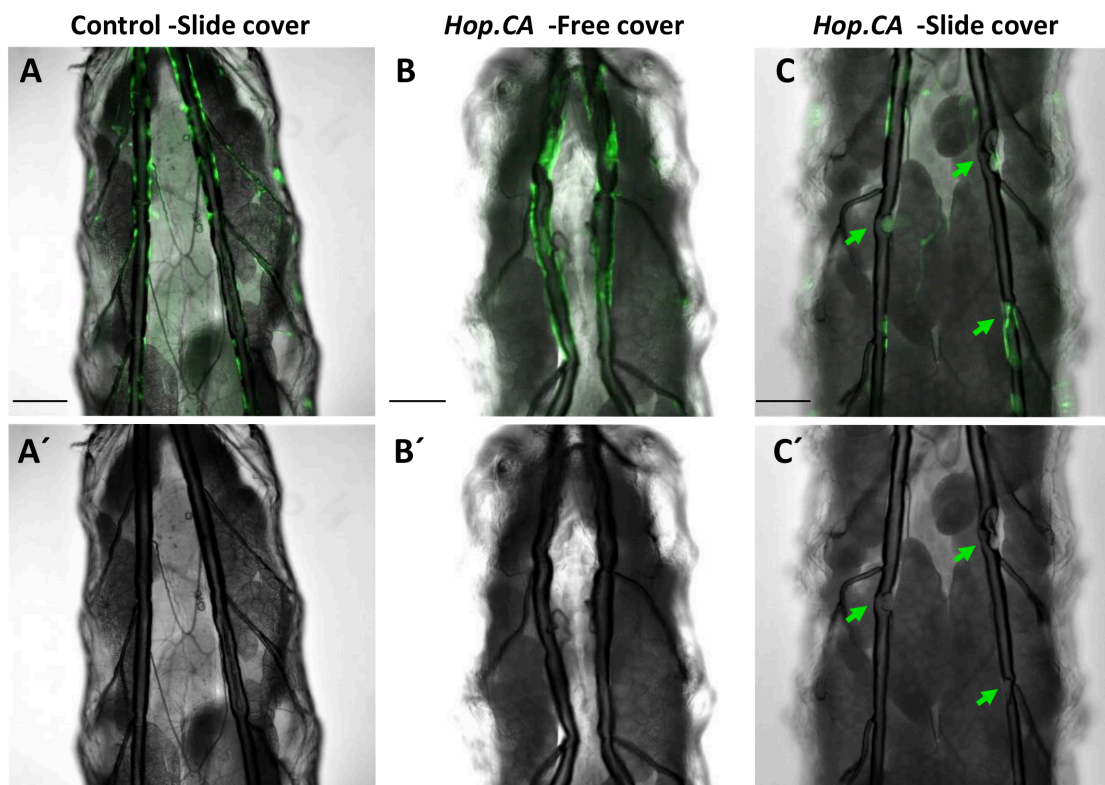

Figure S7 Micrographs of the trachea of *vvl-coin* larvae under different conditions. In A, the control is shown, in B, the undisturbed larvae of animals experiencing *Hop.CA* overexpression are displayed. (C) similar animals as in B, but the animals covered with a slide, inducing a certain degree of compression. The arrows show the collapsed sites in the tracheal tube. 30 larvae in each group were investigated in A-C. Scale bar: 200  $\mu\text{m}$ .

## Supplementary tables

Table S1: Kegg pathway analysis of genes, whose expression is regulated in response to *Hop.CA* overexpression.

| Term                                         | # regulated gene | #REF | corrective p-value |
|----------------------------------------------|------------------|------|--------------------|
| Protein processing in endoplasmic reticulum  | 37               | 122  | 0.000196415        |
| Metabolism of xenobiotics by cytochrome P450 | 21               | 62   | 0.005458041        |
| Glutathione metabolism                       | 20               | 62   | 0.006987233        |
| Drug metabolism - cytochrome P450            | 20               | 62   | 0.006987233        |
| Metabolic pathways                           | 143              | 924  | 0.010283682        |
| Fatty acid metabolism                        | 14               | 42   | 0.033601606        |

Table S2: 32 regulated genes in GO9 and GO10.

| Name       | Max group mean | Fold change | FDR p-value |
|------------|----------------|-------------|-------------|
| CG4293     | 30.32889       | 1.492049    | 0.004753    |
| Cog7       | 15.97701       | 1.44363     | 0.012736    |
| deltaCOP   | 103.7106       | 1.56551     | 0.00068     |
| CG9536     | 23.15629       | 1.351438    | 0.02827     |
| Sec22      | 72.30199       | 1.402676    | 0.031492    |
| sau        | 77.49881       | 1.431877    | 0.01605     |
| epsilonCOP | 76.10362       | 1.399189    | 0.011535    |
| CG7456     | 23.9483        | 1.537314    | 0.001188    |
| Syx18      | 28.09394       | 1.355287    | 0.021462    |
| CG11857    | 79.55307       | 1.348644    | 0.047345    |
| zetaCOP    | 96.3113        | 1.510022    | 0.003362    |
| CG31729    | 46.75703       | 1.881828    | 7.98E-07    |
| CG5946     | 43.55012       | -1.48145    | 0.006965    |
| CG7011     | 52.77113       | 1.986896    | 2.63E-08    |
| alphaCOP   | 74.65062       | 1.44925     | 0.029706    |
| GABPI      | 24.92601       | 1.662457    | 5.17E-05    |
| CG4293     | 30.32889       | 1.492049    | 0.004753    |
| p115       | 23.55302       | 1.500032    | 0.00275     |
| bai        | 264.6093       | 1.394544    | 0.025263    |
| KdelR      | 165.6429       | 1.434894    | 0.034105    |
| betaCOP    | 95.96036       | 1.602758    | 0.001899    |
| Bet1       | 36.37198       | 1.509118    | 0.005981    |
| Sec24AB    | 22.08689       | 1.427689    | 0.012235    |
| Tango1     | 26.83374       | 1.451327    | 0.021437    |
| Sec13      | 103.0673       | 1.556802    | 0.000783    |
| PAPLA1     | 18.71817       | 1.703538    | 5.78E-05    |
| Sec16      | 12.41264       | 1.385734    | 0.041951    |
| Sec23      | 122.68         | 1.544822    | 0.010929    |
| Sec31      | 49.0174        | 1.658867    | 0.000545    |
| loj        | 137.7512       | 1.573849    | 0.000975    |
| Sec24CD    | 53.79686       | 1.555751    | 0.002476    |
| eca        | 159.2751       | 1.512845    | 0.003406    |
| ergic53    | 180.2582       | 1.749912    | 0.000928    |
| alphaCOP   | 74.65062       | 1.44925     | 0.029706    |

Table S3: Transcription factor-binding site motifs enriched in 32 regulated genes in GO9 and GO10.

| Matrix ID | Matrix Name | P-value    |
|-----------|-------------|------------|
| MA0230.1  | lab         | 0.00226225 |
| MA0244.1  | slbo        | 0.00555053 |
| MA0446.1  | fkf         | 0.00663537 |
| MA0186.1  | Dfd         | 0.010245   |
| MA0165.1  | Abd-B       | 0.0114577  |
| MA0170.1  | C15         | 0.0120483  |
| MA0013.1  | Br (var.4)  | 0.0219955  |
| MA0203.1  | Scr         | 0.0261687  |
| MA0206.1  | abd-A       | 0.0264781  |
| MA0448.1  | H2.0        | 0.0340574  |
| MA0197.2  | nub         | 0.0356034  |
| MA0174.1  | Dbx         | 0.0369558  |
| MA0458.1  | slp1        | 0.0372846  |
| MA0221.1  | eve         | 0.0412541  |
| MA0219.1  | ems         | 0.0429901  |
| MA0225.1  | ftz         | 0.0474096  |
| MA0012.1  | Br (var.3)  | 0.0476299  |
